# Development of Accurate Long-lead COVID-19 Forecast

Wan Yang<sup>1,2</sup> and Jeffrey Shaman<sup>3,4</sup>

<sup>1</sup>Department of Epidemiology, Mailman School of Public Health, Columbia University, New York, NY, USA; <sup>2</sup>Herbert Irving Comprehensive Cancer Center, Columbia University Medical Center, New York, NY, USA; <sup>3</sup>Department of Environmental Health Sciences, Mailman School of Public Health, Columbia University, New York, NY, USA; <sup>4</sup>Columbia Climate School, Columbia University, New York, NY, USA

Correspondence to: [wy2202@cumc.columbia.edu](mailto:w2202@cumc.columbia.edu) (WY)

**Short title:** Long-lead COVID-19 forecast

**One sentence summary:** To support more proactive planning, we develop COVID-19 forecast methods that substantially improve accuracy with lead time up to 6 months.

## Abstract

Coronavirus disease 2019 (COVID-19) will likely remain a major public health burden; accurate forecast of COVID-19 epidemic outcomes several months into the future is needed to support more proactive planning. Here, we propose strategies to address three major forecast challenges, i.e., error growth, the emergence of new variants, and infection seasonality. Using these strategies in combination we generate retrospective predictions of COVID-19 cases and deaths 6 months in the future for 10 representative US states. Tallied over >25,000 retrospective predictions through September 2022, the forecast approach using all three strategies consistently outperformed a baseline forecast approach without these strategies across different variant waves and locations, for all forecast targets. Overall, probabilistic forecast accuracy improved by 64% and 38% and point prediction accuracy by 133% and 87% for cases and deaths, respectively. Real-time 6-month lead predictions made in early October 2022 suggested large attack rates in most states but a lower burden of deaths than previous waves during October 2022 – March 2023; these predictions are in general accurate compared to reported data. The superior skill of the forecast methods developed here demonstrate means for generating more accurate long-lead forecast of COVID-19 and possibly other infectious diseases.

## Author Summary

Infectious disease forecast aims to reliably predict the most likely future outcomes during an epidemic. To date, reliable COVID-19 forecast remains elusive and is needed to support more proactive planning. Here, we pinpoint the major challenges facing COVID-19 forecast and propose three strategies. Comprehensive testing shows the forecast approach using all three strategies consistently outperforms a baseline approach without these strategies across

39 different variant waves and locations in the United States for all forecast targets, improving the  
40 probabilistic forecast accuracy by ~50% and point prediction accuracy by ~100%. The superior  
41 skills of the forecast methods developed here demonstrate means for generating more  
42 accurate long-lead COVID-19 forecasts. The methods may be also applicable to other infectious  
43 diseases.

44  
45 **Keywords:** COVID-19 forecast; long lead-time; error growth; new variants; infection seasonality

## 46 47 **Main text**

### 48 **INTRODUCTION**

49 The severe acute respiratory syndrome coronavirus 2 (SARS-CoV-2) emerged in late 2019,  
50 causing the coronavirus disease 2019 (COVID-19) pandemic. Since its onset, mathematical  
51 modeling has been widely applied to generate projections of potential pandemic trajectories,  
52 including for cases, hospitalizations, and deaths. These model projections are often based on  
53 specific assumptions (i.e., scenarios) regarding critical factors affecting transmission dynamics.  
54 For example, the scenarios often include a combination of public health policies [e.g., non-  
55 pharmaceutical interventions (NPIs) including lockdown/reopening and masking, and  
56 vaccinations], population behavior (e.g., adherence to the policies and voluntary preventive  
57 measures), and anticipated changes in the epidemiological properties of SARS-CoV-2 variants  
58 (1-4). While such efforts have provided overviews of the potential outcomes under various  
59 scenarios, they do not assign likelihoods to the scenarios/projected trajectories, and the most  
60 likely trajectory is typically not known until the outcome is observed. That is, scenario  
61 projection is not equivalent to calibrated infectious disease *forecast*, which aims to reliably  
62 predict the most likely future outcomes during an epidemic. As COVID-19 will likely remain a  
63 major public health burden in the years to come, sensible forecast of the health outcomes  
64 several months in the future is needed to support more proactive planning.

65  
66 Compared to forecast of epidemic infections (e.g., influenza), a number of additional challenges  
67 exist for long-lead COVID-19 forecast. First, SARS-CoV-2 new variants will likely continue to  
68 emerge and remain a major source of uncertainty when generating COVID-19 forecasts (5, 6).  
69 As has been observed for the major variants of concern (VOCs) reported to date (i.e., Alpha,  
70 Beta, Gamma, Delta, and Omicron), future new variants could arise at any time, could quickly  
71 displace other circulating variants, and could be more contagious than pre-existing variants,  
72 and/or erode prior infection- and/or vaccination-induced immunity to affect underlying  
73 population susceptibility. Further, multiple new variants could arise successively to cause  
74 multiple waves during a time span of, e.g., 6 months. Such frequent emergence and fast  
75 turnover of circulating variants is in stark contrast with epidemic infections. Second, many  
76 infections for other respiratory viruses tend to occur during a certain season of the year and as

77 such, the seasonality can be incorporated to improve forecast accuracy (7, 8) as well as restrict  
78 the forecast window to the epidemic season (e.g., influenza during the winter in temperate  
79 regions). Potential seasonality for SARS-CoV-2 is still not well characterized. For instance, in the  
80 US, where larger waves have occurred in the winter during 2020-2022, smaller summer waves  
81 have also occurred (e.g. the initial Delta wave and Omicron subvariant waves; Fig 1). Third,  
82 given the unknown timing of new variant emergence, year-round, long-lead COVID-19 forecast  
83 will likely be needed. These unknowns also necessitate wider parameter ranges using a forecast  
84 ensemble to account for the uncertainty, which over long forecast horizons could lead to  
85 greater error growth and poorer predictive accuracy.

86  
87 In this study, we aim to address the above challenges and develop sensible approaches that  
88 support long-lead prediction of COVID-19 epidemic outcomes. We propose three strategies for  
89 improving forecast accuracy and test the methods in combination by generating retrospective  
90 forecasts of COVID-19 cases and deaths in 10 representative states in the US (i.e., California,  
91 Florida, Iowa, Massachusetts, Michigan, New York, Pennsylvania, Texas, Washington, and  
92 Wyoming; Fig 1). Relative to a baseline approach, the forecast approach based on our  
93 strategies largely improves forecast accuracy (64%/38% higher probabilistic log score for  
94 cases/deaths, and 133%/87% higher point prediction accuracy for cases/deaths, tallied over  
95 25,183 evaluations of forecasts initiated during July 2020 – September 2022, i.e., from the end  
96 of the initial wave to the time of this study). These results highlight strategies for developing  
97 and operationalizing long-lead COVID-19 forecasts with greater demonstrated accuracy and  
98 reliability. In addition, we generate real-time COVID-19 forecasts for October 2022 – March  
99 2023 (roughly covering the 2022-2023 respiratory virus season) and evaluate these forecasts  
100 using data reported 6 months later.

101

## 102 **RESULTS**

### 103 **Proposed strategies for long-lead COVID-19 forecast**

104 To address the three challenges noted above, we propose three strategies in combination.  
105 Details are provided in Methods. Here, we summarize the idea behind each strategy. The first  
106 strategy is to constrain error growth during the extended forecast period. As noted above, the  
107 multiple uncertainties regarding SARS-CoV-2 (e.g., new variant properties) necessitate wider  
108 distributions of the state variables (e.g., population susceptibility) and parameters (e.g., virus  
109 transmissibility) at the point of forecast initiation. With a wider forecast ensemble, some  
110 ensemble members could predict earlier, large outbreaks, which if premature, would deplete  
111 modeled susceptibility and incorrectly preclude outbreaks later on. More generally, like other  
112 infections, COVID-19 epidemics often grow exponentially at first, triggering exponential  
113 changes in susceptibility and other state variables, which in turn feed back on the longer  
114 epidemic trajectory. Such infectious disease dynamics imply forecast error can also grow

115 exponentially, leading to accelerated degradation of forecast accuracy after the first few weeks.  
116 To counteract this exponential error growth, we propose to apply a multiplicative factor  $\gamma < 1$   
117 to the covariance of the forecast state variables (e.g., susceptibility) while retaining the ensemble  
118 mean (see Methods). In so doing, we can represent initial uncertainty with a broad forecast  
119 ensemble while countering excessive error growth of the state variables. This strategy is similar  
120 to covariance inflation during system optimization (9, 10), where a  $\gamma > 1$  is applied to the  
121 covariance to counteract over-narrowing of the model ensemble. Since here it acts in the  
122 opposite direction, we refer to this technique as deflation. Fig 2A shows example forecasts  
123 with deflation compared to without it.

124  
125 The second strategy is to anticipate the impact of new variants. Genomic sequencing data can  
126 support prediction of the impact of a new variant a few weeks in the future (see Methods and  
127 the SI); however, variant displacement and competition dynamics can occur unexpectedly  
128 beyond those first few weeks, rendering historical data less relevant. Thus, for weeks farther in  
129 the future, instead of predicting specific new variants, we propose to use a set of heuristic rules  
130 to anticipate their likely emergence timing and impact on population susceptibility and virus  
131 transmissibility. Specifically, for the timing, we reason that new variants are more likely to  
132 emerge/circulate 1) after a large local wave when more infections could lead to more  
133 mutations, which could be timed based on local outbreak intensity during the preceding  
134 months; and 2) during a time when a large part of the world is experiencing a large wave, which  
135 also could lead to new mutations. For instance, in the US, this could be during the winter when  
136 local large waves tend to occur, or the summer when places in the southern hemisphere are  
137 amid their winter waves. As such, this could be timed based on the calendar. For the new  
138 variant impact, we observe that, new variant circulation often results in gradual increases in  
139 susceptibility (e.g., a few percentages per week, based on estimates from New York City during  
140 VOC waves), possibly due to the substantial population immunity accumulated via infections  
141 and vaccinations. Similarly, changes in transmissibility also tend to occur gradually. As such, we  
142 propose to apply small increases to the model population susceptibility and transmissibility  
143 during those two plausible times. The rationale here is to anticipate the more common, non-  
144 major changes so as not to overpredict, because major VOCs causing dramatic changes are  
145 rarer and difficult to predict. Fig 2B shows example forecasts with these new variant settings  
146 compared to without them.

147  
148 The third strategy accounts for seasonality. Instead of assuming a specific epidemic timing, we  
149 model the seasonal risk of SARS-CoV-2 infection based on plausible underlying drivers of  
150 infection seasonality for common respiratory viruses. Specifically, studies have shown that  
151 respiratory viruses including SARS-CoV-2 are sensitive to ambient humidity and temperature  
152 conditions, which could in turn modulate their survival and transmission (11-15). Accordingly,

153 we developed a climate-forced model that includes both humidity and temperature to capture  
154 the reported virus response and parameterized the model based on long-term epidemic data  
155 observed for influenza (16). When modified and applied to account for SARS-CoV-2 seasonality  
156 in a model-inference framework, the estimated seasonal trends are able to capture the effects  
157 of different climate conditions (e.g., for UK, Brazil, India, and South Africa (17-19)). Here, we  
158 thus propose to apply this model and local climate data to estimate SARS-CoV-2 seasonality in  
159 each location (referred to as “fixed seasonality”; see estimates for the 10 states in Fig S1). In  
160 addition, as the model is parameterized based on influenza data, this estimated seasonality  
161 could differ from the true SARS-CoV-2 seasonality. To test this, we propose an alternative  
162 seasonality form that transforms the fixed seasonality trend to allow a more flexible phase  
163 timing and structure of seasonality (referred to as “transformed seasonality”; see details in the  
164 SI and examples for the 10 states in Fig S1). Fig 2C shows a comparison of the two seasonality  
165 forms and example forecasts with no seasonality and the two seasonality forms.

166  
167 We test the above three strategies in combination, including three deflation settings (i.e.,  
168 setting  $\gamma = 1, 0.95,$  and  $0.9$ ), two new variant settings (i.e., assuming no new variants vs.  
169 anticipating new variants per the rules noted above), and three seasonality settings (i.e., no,  
170 fixed, and transformed seasonality): in total, 12 ( $= 3 \times 2 \times 3$ ) forecast approaches. To compare  
171 the performance of the 12 forecast approaches, we generated retrospective forecasts for 10  
172 states, from July 2020 – August 2021 (Pre-Omicron period; 65 weeks in total) and December  
173 2021 – September 2022 (Omicron period; ~37 weeks). For each week, a forecast for the  
174 following 26 weeks (~6 months) is generated after model training using data up to the week of  
175 forecast. We then evaluate the accuracy predicting the weekly number of cases and deaths  
176 during each of the 26 weeks (i.e. 1- to 26-week ahead prediction), as well as the peak timing  
177 (i.e. the week with the highest cases/deaths), peak intensity, cumulative number of cases and  
178 deaths over the 26 weeks.

179  
180 For the forecast comparisons below, we evaluated probabilistic forecast accuracy using log  
181 score, i.e., the logarithm of the probability correctly assigned to the true target (see Methods  
182 and SI). We also evaluated point prediction accuracy – assigning value 1 (i.e., accurate) to a  
183 forecast if the point prediction is within  $\pm 25\%$  of the observed case/death count or within  $\pm 1$   
184 week of the observed peak week, and 0 (i.e., inaccurate) otherwise; as such, when averaged  
185 over all forecasts, this accuracy gives the percentage of forecasts a point prediction is accurate  
186 within these tolerances. Thus, both higher log score and higher point prediction accuracy  
187 indicate superior forecast performance.

188

189 **The impact of deflation**

190 Compared to forecasts with no deflation ( $\gamma = 1$ ), applying a small deflation ( $\gamma = 0.95$  or  $0.9$ )  
191 consistently improves forecast performance (Fig 3, first two panels). This improvement is  
192 evident across all locations and combinations of the other two model settings (i.e., new variants  
193 and seasonality). The improvement is most pronounced for the long-lead (i.e., 17- to 26-week  
194 ahead) weekly forecasts and overall intensity-related targets (i.e., the totals accumulated over  
195 26 forecast weeks and peak intensity; Figs S2-3), indicating deflation is able to effectively  
196 reduce error growth accumulated over time. We note that, as deflation works by reducing  
197 forecast spread, the forecast ensemble can also become under-dispersed, assign zero  
198 probability to the true target (most notably, for peak week), and in turn produce a lower log  
199 score (see Fig S2, the 3<sup>rd</sup> row of each heatmap for peak week). Given this trade-off, we did not  
200 test deflation factors  $<0.9$ .

201  
202 Overall, relative to forecasts without deflation ( $\gamma = 1$ ), log scores aggregated over all locations  
203 and targets were 18 – 20% higher for forecasts of cases (range of relative change across all  
204 combinations of the other two model settings; Table S1) and 7 – 8% higher for forecasts of  
205 mortality when a deflation factor  $\gamma$  of 0.95 was applied. The log scores further increased when  
206 using  $\gamma = 0.9$ , to 34 – 43% higher (than  $\gamma = 1$ ) for forecasts of cases and 13 – 17% higher for  
207 forecasts of mortality. The improvement of point prediction accuracy was more pronounced.  
208 Aggregated over all locations and targets, point prediction accuracy was 33 – 63% higher for  
209 forecasts of cases and 24 – 40% higher for forecasts of mortality when using a deflation factor  $\gamma$   
210 of 0.9, relative to using no deflation (Table S1). As such, we use  $\gamma = 0.9$  as the best-performing  
211 setting for subsequent analyses.

212

### 213 **Impact of the new variant settings**

214 To ensure consistency and avoid over-fitting, we applied the same set of heuristic rules on new  
215 variant emergence timing and impact, as noted above, throughout the entire study period (i.e.,  
216 including weeks before the emergence of SARS-CoV-2 VOCs). We expect the new variant  
217 settings to improve forecast performance during VOC waves but have a less pronounced or no  
218 effect during the 2<sup>nd</sup> wave (roughly, fall/winter 2020 – 2021), prior to VOC emergence. Indeed,  
219 overall, for the 2<sup>nd</sup> wave, forecast systems with the new variant settings (referred to as “new  
220 variant model”) had similar performance as those assuming no new variants (relative changes  
221 in log score and accuracy: -2% to 0.6%, Table S2; Fig 4). However, for the VOC waves, applying  
222 the new variant settings improved forecast performance during the Alpha wave (roughly, spring  
223 2021), Delta wave (roughly, summer/fall 2021), and Omicron wave (after December 2021; note  
224 no further desegregation was made for Omicron subvariant waves due to small sample sizes;  
225 Fig 4). For forecasts of cases, the improvement was consistently seen for all three VOC waves  
226 (relative changes in log score and accuracy all  $> 0$ , Table S2). The relative increases of log score  
227 were up to 119% during the Delta wave and up to 37% during the Omicron wave; the relative

228 increases of point prediction accuracies were up to 89% during the Delta wave and up to 96%  
229 during the Omicron wave (Table S2 and Fig 4).

230  
231 For forecasts of mortality, the new variant model had higher log scores during the Alpha and  
232 Delta waves, as well as higher point prediction accuracies during all three VOC waves (Table S2).  
233 However, log scores during the Omicron wave were similar for both models (e.g., overall log  
234 scores: -0.22 for the new variant model and -0.17 for the baseline, both assuming no  
235 seasonality); in addition, the log scores were slightly lower for the new variant model, likely due  
236 to the lower COVID-19-associated deaths during the Omicron wave.

237  
238 Aggregated over all waves, targets, and locations, the new variant model had 17 – 34% and 3 –  
239 8% higher log scores and 23 – 28% and 22 – 25% higher point prediction accuracies for  
240 forecasts of cases and deaths, respectively.

#### 241 242 **Impact of seasonality forms**

243 Based on the above results, we focus on forecasts generated using the new variant model with  
244 a deflation factor of 0.9 to examine the three approaches to forecasting the effects of  
245 seasonality. As noted above, seasonality aims to capture changes in infection risk in response to  
246 environmental conditions (here, ambient humidity and temperature); for common respiratory  
247 viruses (e.g., influenza), infection risk in temperate regions is often higher during cold-dry  
248 winter months (i.e., respiratory virus season, roughly mid-October to mid-April in the US), and  
249 lower during the rest of the year (i.e., off season). Both the fixed and transformed seasonality  
250 models consistently improved forecast performance during the respiratory virus season relative  
251 to the no seasonality approach across all locations and targets (Fig 5A for log score and 5B for  
252 point prediction accuracy, first two panels; Table S3). However, if only analyzing the off season,  
253 both models had worse performance compared to the model assuming no seasonality (Fig 5, 4<sup>th</sup>  
254 and 5<sup>th</sup> panels). Segregating the forecasts made for the off season by wave shows that both  
255 seasonality models continued to outperform the no seasonality model during summer/fall 2020  
256 (grouped with the 2<sup>nd</sup> wave); worse performance occurred during summer/fall 2021 (the Alpha  
257 and Delta waves) and summer 2022 (Omicron subvariants; Table S3). These results suggest that  
258 the seasonality models are able to capture the seasonal risk of SARS-CoV-2 infection, and that  
259 the degraded performance during the off season may be due to challenges anticipating the  
260 initial surge of VOCs occurring during those times.

261  
262 Talled over all time periods, in general, the seasonality models outperformed the no  
263 seasonality model (Table S3 for all locations combined and Table S4 for each location).  
264 Comparing the two seasonality forms, the transformed seasonality model outperformed the  
265 fixed seasonality model overall (Table S3). Compared to the no seasonality model, the

266 transformed seasonality had 14% higher log score for forecasts of mortality, and 26% and 18%  
267 higher point prediction accuracies for cases and mortality, respectively (Table S3). As noted  
268 above, the improvement during the respiratory virus season was more substantial (Tables S3  
269 and S4; Fig 5).

270

### 271 **Combined impact of deflation, new variant settings, and seasonality forms**

272 We now examine the forecast performance using the combined best-performing approach (i.e.,  
273 applying deflation with  $\gamma = 0.9$ , the new variant rules, and the transformed seasonality form),  
274 compared to the baseline approach (i.e., no deflation, no new variants, and no seasonality). In  
275 addition to the large uncertainties surrounding SARS-CoV-2 (e.g., new variants), there are also  
276 large spatial heterogeneities. For example, across the 10 states included here, population  
277 density ranged from 6 people per square mile in Wyoming to 884 per square mile in  
278 Massachusetts (2020 data (20)); climate conditions span temperate (e.g., New York) and  
279 subtropical climates (e.g., Florida; Fig S1). Given the uncertainties and spatial heterogeneities,  
280 the robustness of any forecast approach is particularly important.

281

282 First, we examine the consistency of forecast performance over different variant periods.

283 During the pre-Omicron period (here, July 2020 – Dec 2021), the combined approach  
284 consistently outperformed the baseline approach across all states, for both forecasts of cases  
285 and deaths (Fig 6A); log scores improved by 85% overall for cases (range from 39% in  
286 Washington to 134% in Florida) and by 62% overall for deaths (range from 24% in Washington  
287 to 117% in Florida; Table 1). During the Omicron period (here, Dec 2021 – September 2022),  
288 improvements were smaller but consistent across the 10 states for forecast of cases (Fig 6A;  
289 note that only 16-20 forecasts of long-lead targets were evaluated here, as observations are  
290 incomplete); as noted above, due to the much lower mortality during the Omicron period, both  
291 the best-performing and baseline forecasts of mortality had similar log scores (e.g., median  
292 difference = -0.02, Table 1). The overall consistency of the performance indicates that the best-  
293 performing forecast approach is robust for forecasting long-lead COVID-19 epidemic outcomes  
294 for different variants.

295

296 Second, we examine the forecast performance during the US respiratory virus season (here,  
297 mid-October to mid-April) when larger COVID-19 waves have occurred. Tallied over all weeks  
298 during the respiratory virus season, the best-performing approach outperformed the baseline  
299 approach for all 10 states (Fig 6B); log scores increased by 105% for cases (range from 32% in  
300 Washington to 213% in Massachusetts) and by 85% for mortality (range from 19% in  
301 Washington to 158% in Iowa; Table 1). During the off season, the best-performing approach  
302 also generally outperformed the baseline approach (Table 1).

303



304 Third, we examine the accuracy predicting different epidemic targets. The best-performing  
305 forecast approach consistently improved point prediction accuracy for all targets for all 10  
306 states (Fig 7 and Table 2). In addition, the improvement was more substantial for long-lead  
307 targets (e.g., 9- to 16-week ahead and 17- to 26-week ahead forecasts, peak week, peak  
308 intensity, and the cumulative totals). For instance, the best-performing approach increased  
309 accuracy from 24% to 42% (35% to 56%) predicting the peak week of cases (deaths), from 20%  
310 to 40% (30% to 50%) predicting the peak intensity of cases (deaths), roughly a 2-fold  
311 improvement for these two long-lead targets. The improvements were even more substantial  
312 for 17-26 week ahead forecasts and the cumulative totals over the entire 26 weeks (by 3- to 22-  
313 fold, Fig 7 and Table 2). We note the forecasts here were generated retrospectively with  
314 information that may not be available in real time and thus likely are more accurate as a result.  
315 Nonetheless, with the same information provided to both forecast approaches, the comparison  
316 here demonstrates the large improvement in forecast accuracy using the best-performing  
317 forecast approach.

318

#### 319 **Forecast performance compared with ARIMAX models**

320 To benchmark the performance of the forecast approaches developed here, we also generated  
321 retrospective forecasts using Auto-Regressive Integrated Moving Average (ARIMA) models.  
322 Compared to the best-performing ARIMAX model (identified from 5 models with different  
323 settings; see Methods and Table S5), our baseline approach (i.e., no deflation, no new variants,  
324 and no seasonality) performed similarly well whereas our best-performing approach (i.e.,  
325 applying deflation with  $\gamma = 0.9$ , the new variant rules, and the transformed seasonality form)  
326 had much superior performance (Table S6).

327

#### 328 **Forecast for the 2022 – 2023 respiratory virus season**

329 Figs 8-9 present real-time forecasts of October 2022 – March 2023 for the 10 states, and Table  
330 S7 shows a preliminary accuracy assessment based on data obtained on March 31, 2023.  
331 Accounting for under-detection, large numbers of infections (i.e., including undocumented  
332 asymptomatic or mild infections) were predicted in the coming months for most states;  
333 predicted attack rates over the 6-month prediction period ranged from 16% (IQR: 7 – 31%) in  
334 Florida to 30% (IQR: 15 – 47%) in Massachusetts (Fig 9). Relatively low case numbers and fewer  
335 deaths at levels similar to or lower than previous waves were forecast, assuming case  
336 ascertainment rates and infection-fatality risks similar to preceding weeks (Fig 9). Compared to  
337 data reported 6 months later (i.e., not used in the forecasts), the weekly forecasts in general  
338 captured trajectories of reported weekly cases over the 6 months for all 10 states (Fig 8, middle  
339 column for each state) but under-predicted deaths for half of the states (i.e., New York,  
340 Massachusetts, Michigan, Wyoming, and Florida; Fig 8, right column for each state). For the  
341 cumulative totals, predicted IQRs covered reported tallies in all 10 states for cases and the

342 majority of states for deaths, while the 95% predicted intervals covered reported cumulative  
343 cases and deaths in all states (Fig 9).

344

## 345 **DISCUSSION**

346 Given the uncertainties surrounding future SARS-CoV-2 transmission dynamics, it is immensely  
347 challenging to accurately predict long-lead COVID-19 epidemic outcomes. Here, we have  
348 proposed three strategies for sensibly improving long-lead COVID-19 forecast. Retrospective  
349 forecast accuracy is substantially improved using the three strategies in combination during  
350 both the pre-Omicron and Omicron periods, including for long-lead targets 6 months in the  
351 future. This improvement is consistent among 10 representative states across the US, indicating  
352 the robustness of the forecast method.

353

354 Our first strategy addresses the accumulation of forecast error over time. The simple deflation  
355 method proposed here substantially improves forecast accuracy across different model settings  
356 (here, different new variant and seasonality forms), time periods (pre-Omicron vs Omicron),  
357 and locations (different states). This consistent improvement indicates that deflation is  
358 effective in constraining outlier ensemble trajectories. Albeit possibly a severer issue for SARS-  
359 CoV-2 due to larger uncertainties and less constrained parameter estimates, error growth is a  
360 common challenge in forecasts of infectious diseases not limited to COVID-19 (21, 22). Future  
361 work could examine the utility of deflation in improving forecast accuracy for other infectious  
362 diseases.

363

364 Another challenge facing COVID-19 forecast derives from the uncertainty associated with new  
365 variant emergence. Based on past epidemiological dynamics of and population response to  
366 SARS-CoV-2 VOCs, we proposed a simple set of heuristic rules and applied them universally  
367 across time periods and locations. Despite their simplicity, the results here show that these  
368 heuristics substantially improved forecast accuracy compared to forecasts generated without  
369 them. These findings suggest that, while it is challenging to forecast the emergence of specific  
370 variants, the timing of future variant emergence and the impacts on key epidemiological  
371 characteristics (i.e., population susceptibility and virus transmissibility) can be learned from  
372 past VOC waves and used to support more accurate forecast. Much uncertainty remains  
373 regarding future SARS-CoV-2 genomic evolution and population immunity; however, the  
374 heuristics proposed here represent a first step anticipating the dynamic interplay of SARS-CoV-2  
375 new variants and population immunity. Continued work to test the robustness of these  
376 heuristics as SARS-CoV-2 and population immunity continue to co-evolve is thus warranted.

377

378 The third focus of this study is seasonality. Several prior studies have examined the potential  
379 seasonality of COVID-19, using methods such as time series analyses, regression models, and

380 sinusoidal functions (23-25). However, the underlying mechanisms and likely nonlinear  
381 response to seasonal drivers are not fully characterized. Several concurrent changes including  
382 case ascertainment rate, NPIs and voluntary behavioral changes, and new variants further  
383 complicate such characterization. Here, we used local weather data along with a mechanistic  
384 model previously developed for influenza (16, 17) to capture the nonlinear response of  
385 respiratory virus survival/transmission to humidity and temperature. In addition, we tested an  
386 alternative seasonality form given the likely differences between SARS-CoV-2 and influenza  
387 (e.g., likely higher infection risk for SARS-CoV-2 than influenza during the summer). When  
388 incorporated in a model-inference framework and forecast system, forecasts with both  
389 seasonality forms outperformed their counterpart without seasonality. Importantly,  
390 improvements during the respiratory season were consistent throughout the pandemic,  
391 including for the VOC waves, as well as for all 10 states with diverse climate conditions (Table  
392 S4 and Fig S1). These findings indicate the robustness of the seasonality functions and the  
393 importance of incorporating seasonality in COVID-19 forecast. More fundamentally, the results  
394 support the idea that a common set of seasonal environmental/climate conditions influence  
395 the transmission dynamics of respiratory viruses, including but not limited to SARS-CoV-2 and  
396 influenza. Among the 10 states tested here, the transformed seasonality function tended to  
397 outperform the fixed seasonality function based on parameters estimated for influenza, except  
398 for Massachusetts and Michigan (Table S4). This difference in performance suggests there are  
399 likely nuances in the seasonality of different respiratory viruses despite shared general  
400 characteristics.

401  
402 To focus on the above three challenges, in our retrospective forecasts, we used data/estimates  
403 to account for several other factors shaping COVID-19 dynamics. These included behavioral  
404 changes (including those due to NPIs), vaccination uptake, changing detection rates and hence  
405 case ascertainment rate, as well as changes in infection fatality risk due to improvement of  
406 treatment, vaccination, prior infection, and differences in the innate virulence of circulating  
407 variants. For real-time forecast, such data and estimates would likely not be available and thus  
408 forecast accuracy would likely be degraded. Nonetheless, as societies emerge from the acute  
409 pandemic phase, many of these factors would likely reach certain norms (e.g., a relative stable  
410 fraction of the population may continue to adopt preventive measures and detection rates may  
411 stay low), reducing these uncertainties. Thus, though demonstrated mainly retrospectively, the  
412 superior skill of the forecast methods developed here demonstrate means for generating more  
413 accurate and sensible long-lead COVID-19 forecasts.

414

## 415 **METHODS**

### 416 **Data used for model calibration**

417 We used COVID-19 case and mortality data (26) – adjusted for circulating variants (27, 28) – to  
 418 capture transmission dynamics, mobility data (29) to represent concurrent NPIs, and  
 419 vaccination data (30, 31) to account for changes in population susceptibility due to vaccination.  
 420 For models including seasonality, we used weather data (i.e., temperature and humidity)(32,  
 421 33) to estimate the infection seasonality trends. See detailed data sources and processing in  
 422 the SI.

423

424 **Model calibration before forecast generation (i.e. inference)**

425 The model-inference system is similar to systems we developed to estimate changes in  
 426 transmissibility and immune erosion for SARS-CoV-2 VOCs including Alpha, Beta, Gamma, Delta,  
 427 and Omicron (17-19). However, to account for the fast waning of vaccine protection against  
 428 infection and differential vaccine effectiveness (VE) against different variants, here we  
 429 additionally accounted for variant-specific VE and waning vaccine protection against infection  
 430 per Eqn 1:

431

$$\begin{cases}
 \frac{dS}{dt} = \frac{R}{L_t} - \frac{b_t e_t m_t \beta_t I S}{N} - \varepsilon + \sum_{\tau=0}^{\tau=T} \rho_{\tau} V_{t-\tau} - \sum_{k=1}^{k=K} v_{k,t} \\
 \frac{dE}{dt} = \frac{b_t e_t m_t \beta_t I S}{N} - \frac{E}{Z_t} + \varepsilon \\
 \frac{dI}{dt} = \frac{E}{Z_t} - \frac{I}{D_t} \\
 \frac{dR}{dt} = \frac{I}{D_t} - \frac{R}{L_t} \\
 \frac{dV}{dt} = \sum_{k=1}^{k=K} v_{k,t} - \sum_{\tau=0}^{\tau=T} \rho_{\tau} V_{t-\tau}
 \end{cases} \quad (\text{Eqn 1})$$

433

434 where  $S$ ,  $E$ ,  $I$ ,  $R$  are the number of susceptible, exposed (but not yet infectious), infectious, and  
 435 recovered/deceased individuals;  $N$  is the population size; and  $\varepsilon$  is the number of travel-  
 436 imported infections. To account for changes due to circulating variants, Eqn 1 includes a time-  
 437 varying transmission rate  $\beta_t$ , latency period  $Z_t$ , infectious period  $D_t$ , and immunity period  $L_t$ . To  
 438 account for the impact of NPIs, Eqn 1 uses the relative population mobility ( $m_t$ ) to adjust the  
 439 transmission rate and a scaling factor ( $e_t$ ) to account for potential changes in effectiveness. To  
 440 account for vaccination and waning,  $V$  is the number of individuals vaccinated and protected  
 441 from infection,  $v_{k,t}$  is the number of individuals immunized after the  $k$ -th dose at time  $t$  and  $\rho_{\tau}$   
 442 is the probability of losing vaccine protection  $\tau$  days post vaccination (see SI and Table S5). As  
 443 described below,  $b_t$  is the seasonal infection risk at time  $t$ , depending on the seasonality  
 444 setting. We further computed the number of cases and deaths each week to match with the  
 445 observations using the model-simulated number of infections occurring each day (see the SI).

446

447 We ran the model jointly with the ensemble adjustment Kalman filter (EAKF (34)) and weekly  
 448 COVID-19 case and mortality data to estimate the model state variables (e.g.,  $S$ ,  $E$ , and  $I$ ) and

449 parameters (e.g.,  $\beta_t, Z_t, D_t, L_t, e_t$ ). Briefly, the EAKF uses an ensemble of model realizations  
450 ( $n=500$  here), each with initial parameters and variables randomly drawn from a *prior* range  
451 (Table S5). After model initialization, the system integrates the model ensemble forward in time  
452 for a week (per Eqn 1) to compute the prior distribution for each model state variable, as well  
453 as the model-simulated number of cases and deaths for that week. The system then combines  
454 the prior estimates with the observed case and death data for the same week to compute the  
455 posterior per Bayes' theorem (34). In addition, as in (17-19), during the filtering process, we  
456 applied space-reprobing (35), i.e., random replacement of parameter values for a small fraction  
457 of the model ensemble, to explore a wider range of parameter possibilities (Table S5). The  
458 space-reprobing algorithm, along with the EAKF, allows the system to capture potential  
459 changes over time (e.g., increased detection for variants causing more severe disease, or  
460 increases in population susceptibility and transmission rate due to a new variant).

461

#### 462 **Variations in forecast systems (deflation, new variant, and seasonality settings)**

463 In total, 12 forecast approaches were tested (3 deflation levels  $\times$  2 new variants settings  $\times$  3  
464 seasonality forms). The deflation algorithm is patterned after covariance inflation, as used in  
465 filtering methods (9, 10). However, unlike inflation applied during filtering (i.e., the model  
466 training period via data assimilation), deflation is applied during the forecast period. As the  
467 state variables change dynamically per the epidemic model (i.e., Eqn 1), the error of some  
468 epidemic trajectories can amplify exponentially over time. Thus, here we applied deflation only  
469 to the state variables (i.e., not to the model parameters), per:

$$470 \quad x_i^{def} = \gamma(x_i - \bar{x}) + \bar{x}, i = 1, \dots, n \text{ (Eqn 2)}$$

471 where  $x_i$  is  $i$ -th ensemble member of a given state variable (here, S, E, or I) at each time step  
472 during the forecast period, before the deflation;  $x_i^{def}$  is the corresponding “deflated” value;  $\gamma$  is  
473 the deflation factor; and  $\bar{x}$  is the ensemble mean of the state variable. Per Eqn 2, deflation  
474 retains the ensemble mean, while reducing the ensemble spread to constrain error  
475 accumulation. In this study, we tested three levels of deflation, by setting  $\gamma$  to 1 (i.e., no  
476 deflation), 0.95, and 0.9, separately.

477

478 To anticipate and account for potential surges and their impact on COVID-19 epidemic  
479 outcomes, we tested two approaches. The first, baseline approach simply assumes there are no  
480 changes in the circulating variant during the forecast period. For this approach, the forecasts  
481 were generated using the latest population susceptibility and transmission parameter estimates  
482 at the point of forecast initiation. For the second, new variant approach, we devised a set of  
483 heuristics to anticipate the likely timing and impact of new variant emergence during the  
484 forecast period, as detailed in the SI.

485

486 Seasonality is incorporated in the epidemic model (Eqn 1) and applied throughout the model  
487 calibration (i.e., inference) and forecast periods. Here, we tested three seasonality settings.  
488 The first assumes no changes in seasonal risk of infection, by setting  $b_t$  in Eqn 1 to 1 for all  
489 weeks (referred to as “no seasonality”). The second seasonality form (termed “fixed  
490 seasonality) estimates the relative seasonality trend ( $b_t$ , same as in Eqn 1) using local humidity  
491 and temperature data, based on the dependency of respiratory virus survival, including that of  
492 SARS-CoV-2, to temperature and humidity (12, 17, 18, 36); see Eqn 3 and details in the SI. The  
493 third seasonality setting (termed “transformed seasonality”) transforms the  $b_t$  estimates to  
494 allow flexibility in the seasonal trend, including the peak timing, the number of weeks during a  
495 year with elevated infection risk, and the lowest risk level (see Eqn 4 and details in the SI). Due  
496 to the lack of SARS-CoV-2 data to inform the parameter estimates, here we opted to optimize  
497 the range for each parameter and used the best parameter ranges (see the SI and Fig S5) in the  
498 transformed seasonality model in the main analysis.

499

#### 500 **Retrospective forecast**

501 We tested the above 12 model-inference and forecast approaches (3 deflation levels  $\times$  2 new  
502 variants settings  $\times$  3 seasonality forms) for 10 states, i.e., California, Florida, Iowa,  
503 Massachusetts, Michigan, New York, Pennsylvania, Texas, Washington, and Wyoming. The 10  
504 states span the 10 Health and Human Services (HHS) regions across the US, representing a wide  
505 range of population characteristics and COVID-19 pandemic dynamics (Fig 1). For all states, we  
506 generated retrospective forecasts of weekly cases and deaths 26 weeks (i.e., 6 months) into the  
507 future for the non-Omicron period and the Omicron period, separately. For the non-Omicron  
508 period, we initiated forecasts each week from the week of July 5, 2020 (i.e., after the initial  
509 wave) through the week of August 15, 2021. Note that because each forecast spans 6 months,  
510 the last forecasts initiated in mid-August 2021 extend to mid-Feb 2022, covering the entire  
511 Delta wave (see Supplemental text for details). For the Omicron period, we initiated forecasts  
512 starting 5 weeks after local detection of Omicron BA.1 (roughly in early December 2021,  
513 depending on local data) through the week of September 25, 2022 (i.e., the last week of this  
514 study).

515

516 To generate a forecast, we ran the model-inference system until the week of forecast, halted  
517 the inference, and used the population susceptibility and transmissibility of the circulating  
518 variant estimated at that time to predict cases and deaths for the following 26 weeks (i.e., 6  
519 months). Because the infection detection rate and infection-fatality risk are linked to  
520 observations of cases and deaths (see the SI), changes of these quantities during the forecast  
521 period could obscure the underlying infection rate and forecast accuracy. Thus, for these two  
522 parameters specifically, we used available model-inference estimates for corresponding  
523 forecast period weeks to allow comparison of model-forecast cases and deaths with the data

524 while focusing on testing the accuracy of different model settings (e.g., seasonality and new  
525 variant settings). For the same reason, we used all available mobility and vaccination data  
526 including those for the forecast period, which would not be available in real time. For weeks in  
527 the future without data/estimates, we used the latest estimates instead. To account for model  
528 and filter stochasticity, we repeated each forecast 10 times, each time with initial parameters  
529 and state variables randomly drawn from the same prior ranges.

530  
531 To evaluate forecast performance, we computed both the log score based on the probabilistic  
532 forecast and the accuracy of point prediction for 1) 1- to 26-week ahead prediction, and 2) peak  
533 week, 3) peak intensity, and 4) cumulative total over the 26-week forecast period, for cases and  
534 deaths, separately. Details are provided in the SI. Here, in brief, to compute the log score, we  
535 first binned the forecast ensemble to generate the forecast probability distribution  $\Pr(x)$ , and  
536 took the logarithm of the sum of  $\Pr(x)$  across all related bins including the one including the  
537 observation ( $bin^*$ ) and two adjacent ones ( $bin^{*-1}$  and  $bin^{*+1}$ ):

$$538 \quad \log score = \log[\Pr(x)_{x \in bin^*} + \Pr(x)_{x \in bin^{*-1}} + \Pr(x)_{x \in bin^{*+1}}] \quad (\text{Eqn 5})$$

539  
540 For the accuracy of point prediction, we deemed a forecast accurate (assigned a value of 1) if  
541 the median of the forecast ensemble is within  $\pm 1$  week of the observed peak week or within  
542  $\pm 25\%$  of the observed case/death count, and inaccurate (assigned a value of 0) otherwise. As  
543 noted above, when aggregated over multiple forecasts, the average would represent the  
544 percentage of time a point prediction is accurate within these tolerances.

545  
546 We compared the performance of each forecast approach (i.e., each of the 12 combinations of  
547 deflation, new variant setting, and seasonality form) overall or by forecast target, segregated by  
548 time period or respiratory virus season. To compute the overall score for each stratum, we  
549 took the arithmetic mean of the log score or point prediction accuracy of forecasts generated  
550 by each forecast system, either across all forecast targets or for each target, over 1) all forecast  
551 weeks during the entire study period (i.e., July 2020 – September 2022), 2) the pre-Omicron  
552 period and Omicron period, separately, 3) the respiratory virus season (mid-October to mid-  
553 April, 6 months) and off season (the remaining 6 months), separately.

554  
555 For pairwise comparison of forecast approaches, we computed the difference of log score or  
556 accuracy by simple subtraction of the two arithmetic-means. Relative difference was also  
557 computed. For the log score, the percent relative difference was computed as:

$$558 \quad \% \text{ relative difference in log score} =$$
$$559 \quad \frac{\exp(\text{mean log score of system a}) - \exp(\text{mean log score of system b})}{\exp(\text{mean log score of system b})} \times 100\% \quad (\text{Eqn 6})$$

560 As noted in (37), the exponent of the mean log score (Eqn 5) can be interpreted as the  
561 probability correctly assigned to the bins containing the observations; thus Eqn 6 gives the

562 relative difference in the correctly assigned forecast probability. The percent relative difference  
563 in accuracy of point prediction was computed as:

$$564 \quad \% \text{ relative difference in accuracy} = \frac{\text{mean accuracy of system a} - \text{mean accuracy of system b}}{\text{mean accuracy of system b}} \times 100\% \text{ (Eqn 7)}$$

566  
567 In addition, we also computed the pair-wised difference of log score or accuracy (paired by  
568 forecast week for each target and location) and used boxplots to examine the distributions  
569 (see, e.g., Fig 6). We used the Wilcoxon rank sum test, a non-parametric statistical method, to  
570 test whether there is a difference in the median of the pair-wised differences (38).

571  
572 **ARIMAX model forecast for comparison with approaches developed in this study**  
573 Auto-Regressive Integrated Moving Average (ARIMA) models and ARIMAX models (X represents  
574 external predictors) are commonly used to forecast different outcomes. For comparison with  
575 the approaches developed here, we also tested five ARIMA(X) models and used them to  
576 generate retrospective forecasts per the same procedure described above. The first model (i.e.,  
577 simple ARIMA model) used weekly case or mortality data alone for model training. The  
578 remaining four models were ARIMAX models: 1) using case/mortality data and mobility data  
579 including for the forecast period (i.e., X = mobility; referred to as “ARIMAX.MOB”); 2) using  
580 case/mortality data and the estimated seasonal trend from the fixed seasonal model (i.e., X =  
581 seasonality; referred to as “ARIMAX.SN”); 3) using case/mortality data, mobility data, and the  
582 estimated seasonal trend (i.e., X = mobility and seasonality; referred to as “ARIMAX.MS”); and  
583 4) using case/mortality data, mobility data, the estimated seasonal trend, and vaccination data  
584 (i.e., X = mobility, seasonality, and vaccination; referred to as “ARIMAX.FULL”). For vaccination,  
585 to account for the impact accumulated over time, we used cumulative vaccinations (here, in the  
586 past 3 months for cases, and the past 9 months for deaths). For model optimization, we used  
587 the “auto.arima” function of the “forecast” R package (39), which searches all possible models  
588 within the specified order constraints (here, we used the default settings) to identify the best  
589 ARIMA(X) model (here, based on the corrected Akaike information criterion by default).

590  
591 For the five model forms, the ARIMAX.FULL model (i.e., including mobility, seasonality, and  
592 vaccination) was only able to generate forecasts for less than half of the study weeks as the  
593 auto.arima function was unable to identify parameters for this model. The other four models  
594 were able to generate forecasts for most study weeks and across the entire study period, the  
595 ARIMAX.SN (i.e., seasonality included) performed the best (see Table S5). As such, we used the  
596 ARIMAX.SN model as a benchmark model for comparison with approaches developed in this  
597 study.

598  
599 **Preliminary assessment of real-time forecasts for the 2022 – 2023 respiratory virus season.**



600 The last forecasts in this study were generated using all available data up to the week starting  
601 October 2, 2022 and spanned 6 months through the week starting March 26, 2023. These were  
602 real-time forecasts generated without future information. We assess these real-time forecasts  
603 using data downloaded on March 31, 2023 (1 day after the data release). Since these data may  
604 be revised in the future (*n.b.* data revision after the initial release has been common), we  
605 consider the assessment preliminary. As detailed in the SI, we used case and mortality data  
606 from the New York Times (NYT; (26)) for model calibration prior to generating the forecasts.  
607 However, in the six months since the initial study, NYT data have become more irregular for  
608 some states, likely due to infrequent data reporting and updating. As such, for this preliminary  
609 assessment, we instead used data from the Centers for Disease Control and Prevention  
610 (CDC)(40), except for mortality in Washington State for which the CDC data appeared to be  
611 misdated whereas NYT data and mortality data from the Center for Systems Science and  
612 Engineering (CSSE) at Johns Hopkins University (41) were consistent with each other. In  
613 addition, the CDC data were aggregated for each week from Thursday to Wednesday, rather  
614 than Sunday to Saturday. To enable the comparison, we thus shifted the dates of the CDC data  
615 3 days.

616

617 All inference, forecast, and statistical analyses were carried out using the R language  
618 (<https://www.r-project.org>).

619

620 **Acknowledgements:** This study was supported by the National Institute of Allergy and  
621 Infectious Diseases (AI145883 and AI163023), the Centers for Disease Control and Prevention (CDC)  
622 and the Council of State and Territorial Epidemiologists (CSTE; contract no.: NU38OT00297), and the  
623 CDC Center for Forecasting and Outbreak Analytics (contract no.: 75D30122C14289).

624

625 **Competing interests:** JS and Columbia University disclose partial ownership of SK Analytics. JS  
626 discloses consulting for BNI.

627

## 628 **References:**

- 629 1. Borchering RK, *et al.* (2021) Modeling of Future COVID-19 Cases, Hospitalizations, and  
630 Deaths, by Vaccination Rates and Nonpharmaceutical Intervention Scenarios - United  
631 States, April-September 2021. *MMWR Morb Mortal Wkly Rep* 70(19):719-724.
- 632 2. Reich NG, *et al.* (2022) Collaborative Hubs: Making the Most of Predictive Epidemic  
633 Modeling. *American Journal of Public Health* 112(6):839-842.
- 634 3. Truelove S, *et al.* (2022) Projected resurgence of COVID-19 in the United States in July-  
635 December 2021 resulting from the increased transmissibility of the Delta variant and  
636 faltering vaccination. *Elife* 11.
- 637 4. Nixon K, *et al.* (2022) An evaluation of prospective COVID-19 modelling studies in the  
638 USA: from data to science translation. *Lancet Digit Health* 4(10):e738-e747.

- 639 5. Koelle K, Martin MA, Antia R, Lopman B, & Dean NE (2022) The changing epidemiology  
640 of SARS-CoV-2. *Science* 375(6585):1116-1121.
- 641 6. Markov PV, Katzourakis A, & Stilianakis NI (2022) Antigenic evolution will lead to new  
642 SARS-CoV-2 variants with unpredictable severity. *Nat Rev Microbiol* 20(5):251-252.
- 643 7. Shaman J, Kandula S, Yang W, & Karspeck A (2017) The use of ambient humidity  
644 conditions to improve influenza forecast. *PLOS Computational Biology* 13(11):e1005844.
- 645 8. Kramer SC & Shaman J (2019) Development and validation of influenza forecasting for  
646 64 temperate and tropical countries. *Plos Computational Biology* 15(2).
- 647 9. Anderson JL & Anderson SL (1999) A Monte Carlo Implementation of the Nonlinear  
648 Filtering Problem to Produce Ensemble Assimilations and Forecasts. *Mon. Weather Rev.*  
649 127(12):2741-2758.
- 650 10. Anderson JL (2007) An adaptive covariance inflation error correction algorithm for  
651 ensemble filters. *Tellus A* 59(2):210-224.
- 652 11. Moriyama M, Hugentobler WJ, & Iwasaki A (2020) Seasonality of Respiratory Viral  
653 Infections. *Annu Rev Virol* 7:83-101.
- 654 12. Morris DH, *et al.* (2021) Mechanistic theory predicts the effects of temperature and  
655 humidity on inactivation of SARS-CoV-2 and other enveloped viruses. *Elife* 10.
- 656 13. Lowen AC, Mubareka S, Steel J, & Palese P (2007) Influenza Virus Transmission Is  
657 Dependent on Relative Humidity and Temperature. *PLoS Pathog* 3(10):e151.
- 658 14. Yang W, Elankumaran S, & Marr LC (2012) Relationship between humidity and influenza  
659 A viability in droplets and implications for influenza's seasonality. *PLoS One*  
660 7(10):e46789.
- 661 15. Li Y, Wang X, & Nair H (2020) Global Seasonality of Human Seasonal Coronaviruses: A  
662 Clue for Postpandemic Circulating Season of Severe Acute Respiratory Syndrome  
663 Coronavirus 2? *J Infect Dis* 222(7):1090-1097.
- 664 16. Yuan H, Kramer SC, Lau EHY, Cowling BJ, & Yang W (2021) Modeling influenza  
665 seasonality in the tropics and subtropics. *PLoS Comput Biol* 17(6):e1009050.
- 666 17. Yang W & Shaman J (2021) Development of a model-inference system for estimating  
667 epidemiological characteristics of SARS-CoV-2 variants of concern. *Nature*  
668 *Communications* 12:5573.
- 669 18. Yang W & Shaman J (2022) COVID-19 pandemic dynamics in India, the SARS-CoV-2 Delta  
670 variant and implications for vaccination. *J R Soc Interface* 19(191):20210900.
- 671 19. Yang W & Shaman JL (2022) COVID-19 pandemic dynamics in South Africa and  
672 epidemiological characteristics of three variants of concern (Beta, Delta, and Omicron).  
673 *Elife* 11.
- 674 20. statista (2020) Population density in the U.S. by federal states including the District of  
675 Columbia in 2020. [https://www.statista.com/statistics/183588/population-density-in-](https://www.statista.com/statistics/183588/population-density-in-the-federal-states-of-the-us/)  
676 [the-federal-states-of-the-us/](https://www.statista.com/statistics/183588/population-density-in-the-federal-states-of-the-us/)
- 677 21. Pei S, Cane MA, & Shaman J (2019) Predictability in process-based ensemble forecast of  
678 influenza. *PLoS Comput Biol* 15(2):e1006783.
- 679 22. Pei S & Shaman J (2017) Counteracting structural errors in ensemble forecast of  
680 influenza outbreaks. *Nat Commun* 8(1):925.
- 681 23. Choi YW, Tuel A, & Eltahir EAB (2021) On the Environmental Determinants of COVID-19  
682 Seasonality. *Geohealth* 5(6):e2021GH000413.

- 683 24. Merow C & Urban MC (2020) Seasonality and uncertainty in global COVID-19 growth  
684 rates. *Proc Natl Acad Sci U S A* 117(44):27456-27464.
- 685 25. Liu X, *et al.* (2021) The role of seasonality in the spread of COVID-19 pandemic. *Environ*  
686 *Res* 195:110874.
- 687 26. The New York Times (2022) Coronavirus (Covid-19) Data in the United States.  
688 <https://github.com/nytimes/covid-19-data>
- 689 27. Global Initiative on Sharing All Influenza Data (GISAIID) (2021) Tracking of Variants.  
690 <https://www.gisaid.org/hcov19-variants/>
- 691 28. Anonymous (CoVariants. <https://covariants.org>
- 692 29. Google Inc. (2020) Community Mobility Reports.  
693 <https://www.google.com/covid19/mobility/>
- 694 30. Our World in Data (2022) Data on COVID-19 (coronavirus) vaccinations by Our World in  
695 Data. [https://github.com/owid/covid-19-](https://github.com/owid/covid-19-data/blob/master/public/data/vaccinations/us_state_vaccinations.csv)  
696 [data/blob/master/public/data/vaccinations/us\\_state\\_vaccinations.csv](https://github.com/owid/covid-19-data/blob/master/public/data/vaccinations/us_state_vaccinations.csv)
- 697 31. Mathieu E, *et al.* (2021) A global database of COVID-19 vaccinations. *Nature human*  
698 *behaviour* 5(7):947-953.
- 699 32. Iannone R (2020) Package 'stationaRy'. [https://cran.r-](https://cran.r-project.org/web/packages/stationaRy/stationaRy.pdf)  
700 [project.org/web/packages/stationaRy/stationaRy.pdf](https://cran.r-project.org/web/packages/stationaRy/stationaRy.pdf)
- 701 33. Iannone R (2020) stationaRy. <https://github.com/rich-iannone/stationaRy>
- 702 34. Anderson JL (2001) An ensemble adjustment Kalman filter for data assimilation. *Mon.*  
703 *Weather Rev.* 129(12):2884-2903.
- 704 35. Yang W & Shaman J (2014) A simple modification for improving inference of non-linear  
705 dynamical systems. *arXiv*:1403.6804.
- 706 36. Biryukov J, *et al.* (2020) Increasing Temperature and Relative Humidity Accelerates  
707 Inactivation of SARS-CoV-2 on Surfaces. *mSphere* 5(4):e00441-00420.
- 708 37. Reich NG, *et al.* (2019) A collaborative multiyear, multimodel assessment of seasonal  
709 influenza forecasting in the United States. *Proc Natl Acad Sci U S A* 116(8):3146-3154.
- 710 38. Diebold FX & Mariano RS (1995) Comparing Predictive Accuracy. *J Bus Econ Stat*  
711 13(3):253-263.
- 712 39. Hyndman RJ & Khandakar Y (2008) Automatic time series forecasting: the forecast  
713 package for R. *Journal of statistical software* 27:1-22.
- 714 40. Centers for Disease Control and Prevention (2023) Weekly United States COVID-19  
715 Cases and Deaths by State. [https://data.cdc.gov/Case-Surveillance/Weekly-United-](https://data.cdc.gov/Case-Surveillance/Weekly-United-States-COVID-19-Cases-and-Deaths-by-/pwn4-m3yp)  
716 [States-COVID-19-Cases-and-Deaths-by-/pwn4-m3yp](https://data.cdc.gov/Case-Surveillance/Weekly-United-States-COVID-19-Cases-and-Deaths-by-/pwn4-m3yp)
- 717 41. Anonymous (2021) COVID-19 Data Repository by the Center for Systems Science and  
718 Engineering (CSSE) at Johns Hopkins University.  
719 <https://github.com/CSSEGISandData/COVID-19>  
720

## Figure and Table Captions

**Fig 1.** Geospatial distribution of the 10 states and overall COVID-19 outcomes. Heatmaps show reported cumulative COVID-19 incidence rates (A) and COVID-19-associated mortality rates (B) in the 10 states included in this study. Line plots show reported weekly number of COVID-19 cases (C) and COVID-19-associated deaths (D) during the study period, for each state.

**Fig 2.** Example forecasts. Vertical dashed lines indicate the week of forecast. Dots show reported weekly cases per 1 million people; only those to the left of the vertical lines are used to calibrate the model and those to the right of the vertical lines are plotted for comparison. Blue lines and blue areas (line = median; darker blue = 50% CI; lighter blue = 80% CI) show model training estimates. Red lines and red areas (line = median; dark red = 50% CI; lighter red = 80% CI) show model forecasts using model settings as labeled in the subtitles.

**Fig 3.** Impact of deflation on forecast performance. Heatmaps show the differences in mean log score (A) or point prediction accuracy (B) between all forecast approaches with different deflation settings (deflation factor  $\gamma = 0.95$  vs none in the 1<sup>st</sup> column, 0.9 vs none in the 2<sup>nd</sup> column, and 0.9 vs 0.95 in the 3<sup>rd</sup> column; see panel subtitles). Results are aggregated for each forecast approach (see specific settings of new variants and seasonality in the y-axis labels) and location (x-axis) over all forecast targets and forecast weeks, for cases (1<sup>st</sup> row) and deaths (2<sup>nd</sup> row), separately. For each pairwise comparison (e.g., 0.95 vs none), a positive difference in log score or point prediction accuracy indicates the former approach (e.g., 0.95) outperforms the latter (e.g., none).

**Fig 4.** Impact of new variant settings on forecast performance. Heatmaps show the differences in mean log score (A) or point prediction accuracy (B) between forecast approaches with vs without anticipation of new variant emergence. All forecasts here were generated using a deflation factor of 0.9. Results are aggregated for each forecast approach (see specific setting of seasonality in panel subtitles), variant wave (y-axis), and location (x-axis) over all forecast targets and forecast weeks for cases (1<sup>st</sup> row) and deaths (2<sup>nd</sup> row), separately. A positive difference indicates superior performance of the forecast approach with anticipation of new variant emergence.

**Fig 5.** Impact of seasonality settings on forecast performance. Heatmaps show the differences in mean log score (A) or point prediction accuracy (B), between pairs of forecast approaches with different seasonality settings (see panel subtitles). All forecasts here were generated using a deflation factor of 0.9 and the new variant setting. Results are aggregated for each forecast target (y-axis) and location (x-axis), over either the respiratory virus season (first 3 columns) or the off season (last 3 columns), for cases (1<sup>st</sup> row) and deaths (2<sup>nd</sup> row), separately. For each pairwise comparison (e.g., fixed vs no seasonality), a positive difference in log score or point prediction accuracy indicates the former approach (e.g., with fixed seasonality) outperforms the latter (e.g., with no seasonality).

**Fig 6.** Probabilistic forecast accuracy of the best-performing and baseline forecast approaches. Boxplots show the distributions of pair-wise difference in log score by variant period (A) or respiratory virus season (B; see panel subtitles). Results are aggregated by location (color-coded for each state) and forecast target (x-axis), for cases and deaths (see panel subtitles), separately. The numbers show the range of number of evaluations of each forecast target (e.g., 59 predictions of peak week during the pre-Omicron period, for each state; 16-20 predictions of peak week during the Omicron period, depending on the timing of Omicron detection in each state). A positive difference indicates superior log score of the best-performing forecast approach.

**Fig 7.** Point prediction accuracy of the best-performing and baseline forecast systems. Points show the average accuracy over all forecast weeks (A) or respiratory virus season (B). Results are aggregated by location (x-axis) and forecast target (panel subtitles) for cases (1<sup>st</sup> row) and deaths (2<sup>nd</sup> row, see panel subtitles) separately. Filled dots show the mean accuracy of forecasts generated using the baseline system; filled triangles show the accuracy of forecasts generated using the best-performing forecast system. The lines linking the two accuracies show the changes (mostly increases, as the triangles are more often above the dots), due to the combined application of the three proposed strategies (deflation, new variants, and transformed seasonality settings). Note all forecasts were generated retrospectively; to enable comparison of the model settings, mobility and vaccination data and estimates of infection detection rate and infection fatality risk during the forecast period were used (see main text for detail).

**Fig 8.** Real-time forecasts for the 2022-2023 respiratory virus season. The states are arranged based on accuracy of historical forecast (higher accuracy for those in the left panel and those on the top). In each panel, each row shows estimates and forecasts of weekly numbers of infections (1<sup>st</sup> column), cases (2<sup>nd</sup> column), or deaths (3<sup>rd</sup> column) for each state. Vertical dashed lines indicate the week of forecast initiation (i.e., October 2, 2022). Dots show reported weekly cases or deaths, including for the forecast period. Blue lines and blue areas (line = median; darker blue = 50% CI; lighter blue = 95% CI) show model training estimates. Red lines and red areas (line = median; dark red = 50% Predictive Interval; lighter red = 95% Predictive Interval) show model forecasts using the best-performing approach.

**Fig 9.** Real-time forecasts of cumulative infections, cases, and deaths during the 2022-2023 respiratory virus season. Box plots show distributions of predicted total number of infections (1<sup>st</sup> panel, scaled to population size; i.e. attack rate), cases (2<sup>nd</sup> panel, scaled to population size), and deaths (3<sup>rd</sup> panel, scaled per 1 million persons) from the week starting 10/2/2022 to the week starting 3/26/2023. Thick line = median; box edge = interquartile range; whisker = 95% prediction interval. The states (x-axis label) are arranged according to accuracy of historical forecast (higher accuracy from left to right). Red asterisks (\*) show reported cumulative cases and deaths during the forecast period.

**Table 1.** Comparison of probabilistic forecast accuracy by the best-performing and the baseline forecast approaches. Numbers show the relative difference in mean log score computed using Eqn 6, the median of pairwise difference in log score (95% CI of the median); asterisk (\*) indicates if the median is significantly  $>0$  or  $<0$  at the  $\alpha = 0.05$  level, per a Wilcoxon rank sum test. Positive numbers indicate superior performance of the best-performing forecast approach.

**Table 2.** Comparison of point prediction accuracy by the best-performing and the baseline forecast approaches. Numbers show the mean point prediction accuracy of forecasts generated using the baseline v. the best-performing forecast approach; asterisk (\*) indicates if the median of pairwise accuracy difference is significantly  $>0$  or  $<0$  at the  $\alpha = 0.05$  level, per a Wilcoxon rank sum test. Note all forecasts were generated retrospectively; to enable comparison of forecast approaches, mobility and vaccination data and estimates of infection detection rate and infection fatality risk during the forecast period were used (see main text for detail).

### Supporting Information (SI)

**Supplemental methods.** Addition details on 1) Data sources and processing; 2) Modeling of variant-specific vaccine effectiveness and waning vaccine protection against infection; 3) Observation model to account for under-detection and time-lags in COVID-19 outcomes; 4) Settings for anticipating the impact of new variants (the new variant approach); 5) The fixed seasonality model; 6) The transformed seasonality model; and 7) The retrospective forecast and forecast evaluation.

**Fig S1.** Comparison of seasonality forms. For each state (each panel), the blue line shows the estimated trend of seasonal infection risk using Eqns 3a-b and location weather data (temperature and humidity). Grey lines show 100 examples of the transformed seasonal trends per Eqns 4a-d with parameters randomly sampled from the best parameter ranges (Fig S4); the black line shows the mean of the 100 example trends.

**Fig S2.** Impact of deflation on probabilistic forecast of different targets. Heatmaps show differences in mean log score for cases (A) and deaths (B), between each forecast approach with different deflation settings (deflation factor  $\gamma = 0.95$  vs none in the 1<sup>st</sup> row, 0.9 vs none in the 2<sup>nd</sup> row, and 0.9 vs 0.95 in the 3<sup>rd</sup> row; see panel subtitles). Results are aggregated over all forecast weeks for each type of target (y-axis), forecast approach (see specific settings of new variants and seasonality in subtitles), and location (x-axis). For each pairwise comparison (e.g., 0.95 vs none), a positive difference indicates the former approach (e.g., 0.95) outperforms the latter (e.g., none).

**Fig S3.** Impact of deflation on point estimate accuracy of different targets. Heatmaps show differences in forecast accuracy of point estimates for cases (A) and deaths (B), between each forecast approach with different deflation settings (deflation factor  $\gamma = 0.95$  vs none in the 1<sup>st</sup> row, 0.9 vs none in the 2<sup>nd</sup> row, and 0.9 vs 0.95 in the 3<sup>rd</sup> row; see panel subtitles). Results are

aggregated over all forecast weeks for each type of target (y-axis), forecast approach (see specific settings of new variants and seasonality in subtitles), and location (x-axis). For each pairwise comparison (e.g., 0.95 vs none), a positive difference indicates the former approach (e.g., 0.95) outperforms the latter (e.g., none).

**Fig S4.** Comparison of forecast performance using the transformed seasonality function, with different parameter ranges. The parameter ranges are shown in x-axis labels for the three parameters in Eqn4a-d (from bottom to top:  $p_{shift}$ ,  $\delta$ , and  $b_{t, lwr}$ ). 'x's indicate the best parameter ranges for the corresponding state.

**Table S1.** Impact of deflation. Numbers show the relative difference in mean log score computed using Eqn 6, or relative difference in mean point prediction accuracy computed using Eqn 7. For each pairwise comparison (e.g., 0.95 vs none), a positive difference indicates the former approach (e.g., 0.95) outperforms the latter (e.g., none).

**Table S2.** Impact of new variants settings. Numbers show the relative difference in mean log score computed using Eqn 6, or relative difference in mean point prediction accuracy computed using Eqn 7, by variant wave. A positive number indicates superior performance of the forecast approach with anticipation of new variant emergence.

**Table S3.** Impact of seasonality, aggregated over all 10 states. Numbers show the relative difference in mean log score or point prediction accuracy, the median of pair-wise difference in log score (95% CI of the median); asterisk (\*) indicates if the median is significantly >0 or <0 at the  $\alpha = 0.05$  level, per a Wilcoxon rank sum test. A positive difference indicates superior log score or point prediction accuracy of the first listed approach; a negative difference indicates superior log score or point prediction accuracy of the second listed approach.

**Table S4.** Impact of seasonality, by state. Numbers show the relative difference in mean log score or point prediction accuracy, the median of pair-wise difference in log score (95% CI of the median); asterisk (\*) indicates if the median is significantly >0 or <0 at the  $\alpha = 0.05$  level, per a Wilcoxon rank sum test. A positive difference indicates superior log score or point prediction accuracy of the first listed approach; a negative difference indicates superior log score or point prediction accuracy of the second listed approach.

**Table S5.** Comparison of forecast performance of the ARIMAX models. Only four models (see the top row for model names) are shown here because the fifth model (ARIMAX.FULL with vaccination included) was only able to generate forecasts for less than half of the study weeks; see details on the models in the main text. Numbers show the mean log score or point prediction accuracy of forecasts (specified in the "metric" column), aggregated across the entire study period and all locations for all forecast targets combined or individual forecast targets (specified in the "target" column). Bolded fonts indicate best performance (highest log score or accuracy).

**Table S6.** Comparison of forecast performance of the approaches developed in this study with the best-performing ARIMAX model. Numbers show the mean log score or point prediction accuracy of forecasts (specified in the “metric” column), aggregated across the entire study period and all locations for all forecast targets combined or individual forecast targets (specified in the “target” column). Bolded fonts indicate best performance (highest log score or accuracy).

**Table S7.** Preliminary assessment of the real-time forecasts initiated the week of October 2, 2022 for October 2022 – March 2023. The log score and accuracy were computed using reported case and mortality data downloaded on March 31, 2023 (see further details in the main text). As shown in Fig 8, COVID-19 mortality data in some states (e.g., Wyoming) were highly irregular during the forecast period, likely an artifact of reporting. Due to these potential data inaccuracies, the mortality-related log score and point prediction accuracy for these states are likely lower than the true values (to be obtained once more complete mortality data are available).

**Table S8.** Prior ranges for the parameters and variables used in the model-inference system. Parameters/state variables are initialized by drawing from uniform distributions specified in the rows labeled “Initialization”. During the filtering process, space-reprobing is applied to explore the state space, i.e., a small fraction of the ensemble members are randomly replaced with values drawn from the uniform distributions specified in the rows labeled with “Space-reprobing”.



## Figures

**Fig 1.** Geospatial distribution of the 10 states and overall COVID-19 outcomes. Heatmaps show reported cumulative COVID-19 incidence rates (A) and COVID-19-associated mortality rates (B) in the 10 states included in this study. Line plots show reported weekly number of COVID-19 cases (C) and COVID-19-associated deaths (D) during the study period, for each state.

(A) Cumulative incidence rate, Mar 2020 – Sep 2022

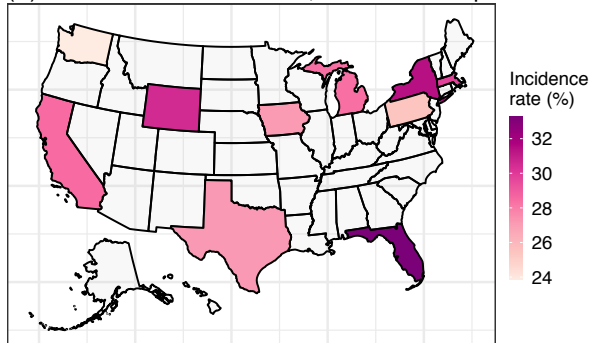

(B) Cumulative mortality rate, Mar 2020 – Sep 2022

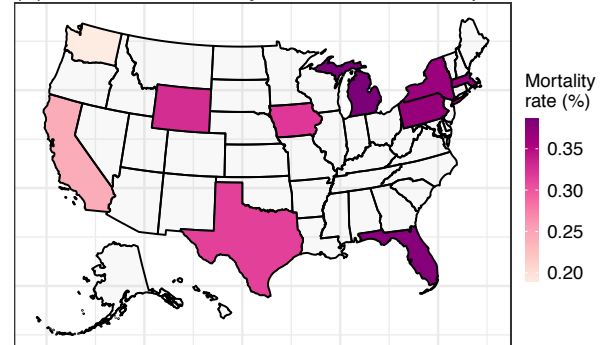

(C) Reported weekly number of COVID-19 cases

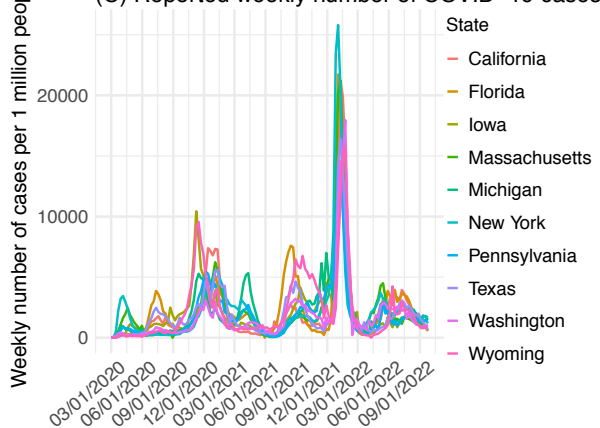

(D) Reported weekly number of COVID-19 deaths

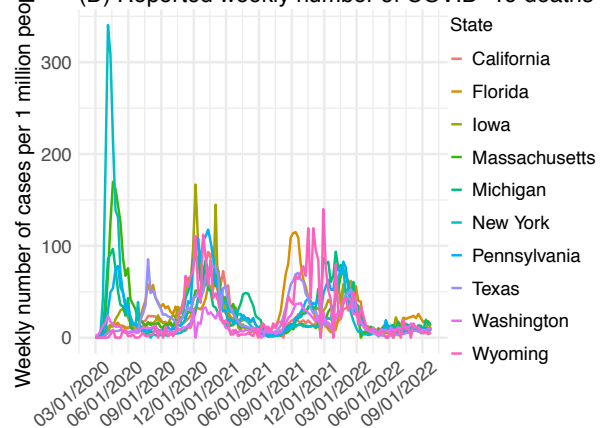

**Fig 2.** Example forecasts. Vertical dashed lines indicate the week of forecast. Dots show reported weekly cases per 1 million people; only those to the left of the vertical lines are used to calibrate the model and those to the right of the vertical lines are plotted for comparison. Blue lines and blue areas (line = median; darker blue = 50% CI; lighter blue = 80% CI) show model training estimates. Red lines and red areas (line = median; dark red = 50% CI; lighter red = 80% CI) show model forecasts using model settings as labeled in the subtitles.

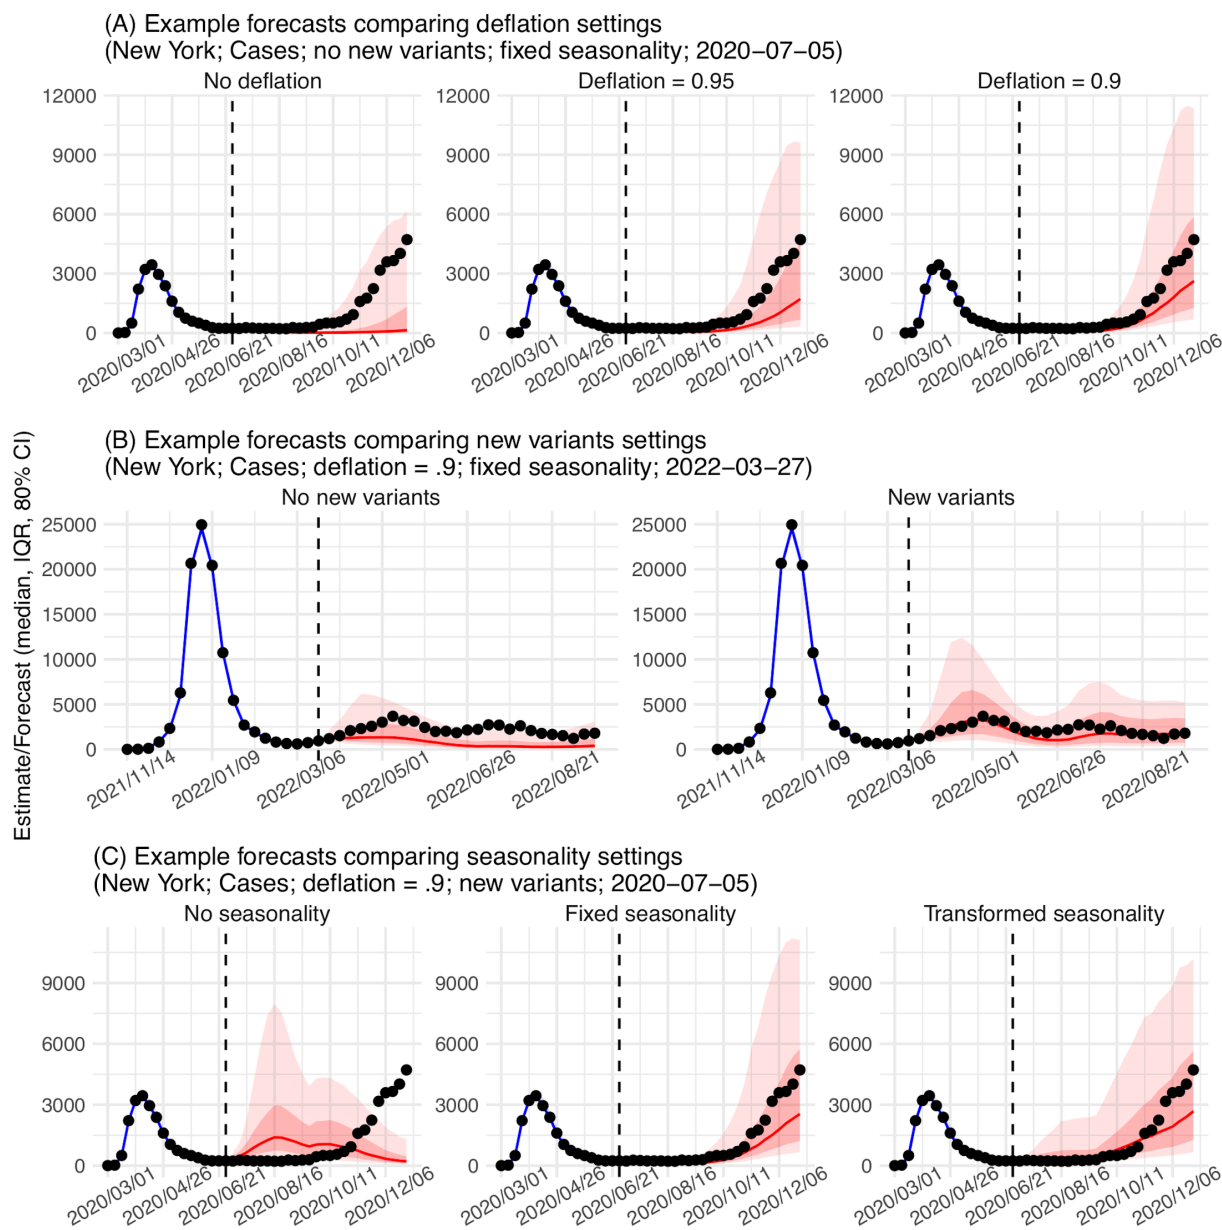

**Fig 3.** Impact of deflation on forecast performance. Heatmaps show the differences in mean log score (A) or point prediction accuracy (B) between all forecast approaches with different deflation settings (deflation factor  $\gamma = 0.95$  vs none in the 1<sup>st</sup> column, 0.9 vs none in the 2<sup>nd</sup> column, and 0.9 vs 0.95 in the 3<sup>rd</sup> column; see panel subtitles). Results are aggregated for each forecast approach (see specific settings of new variants and seasonality in the y-axis labels) and location (x-axis) over all forecast targets and forecast weeks, for cases (1<sup>st</sup> row) and deaths (2<sup>nd</sup> row), separately. For each pairwise comparison (e.g., 0.95 vs none), a positive difference in log score or point prediction accuracy indicates the former approach (e.g., 0.95) outperforms the latter (e.g., none).

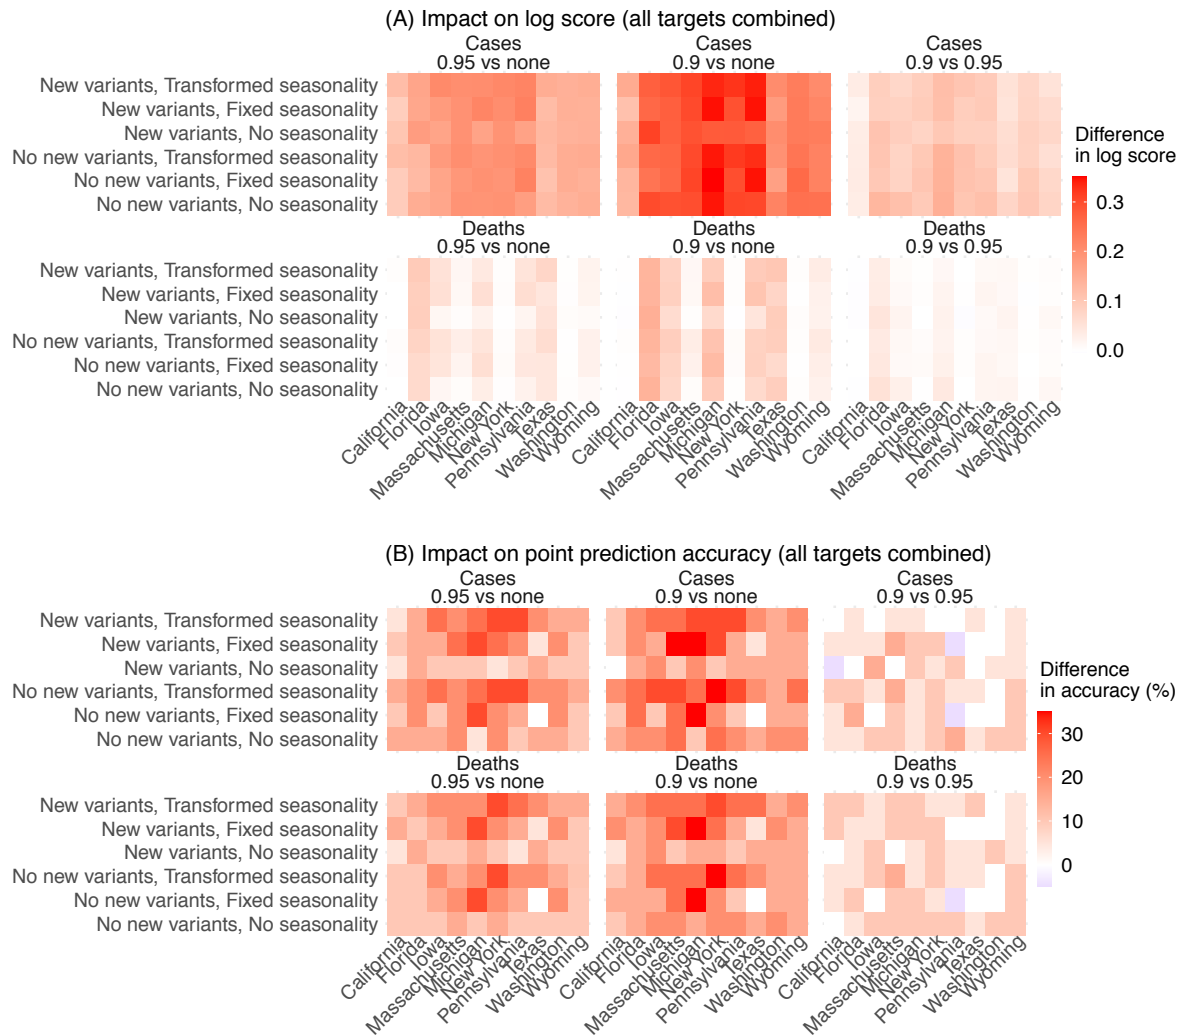

**Fig 4.** Impact of new variant settings on forecast performance. Heatmaps show the differences in mean log score (A) or point prediction accuracy (B) between forecast approaches with vs without anticipation of new variant emergence. All forecasts here were generated using a deflation factor of 0.9. Results are aggregated for each forecast approach (see specific setting of seasonality in panel subtitles), variant wave (y-axis), and location (x-axis) over all forecast targets and forecast weeks for cases (1<sup>st</sup> row) and deaths (2<sup>nd</sup> row), separately. A positive difference indicates superior performance of the forecast approach with anticipation of new variant emergence.

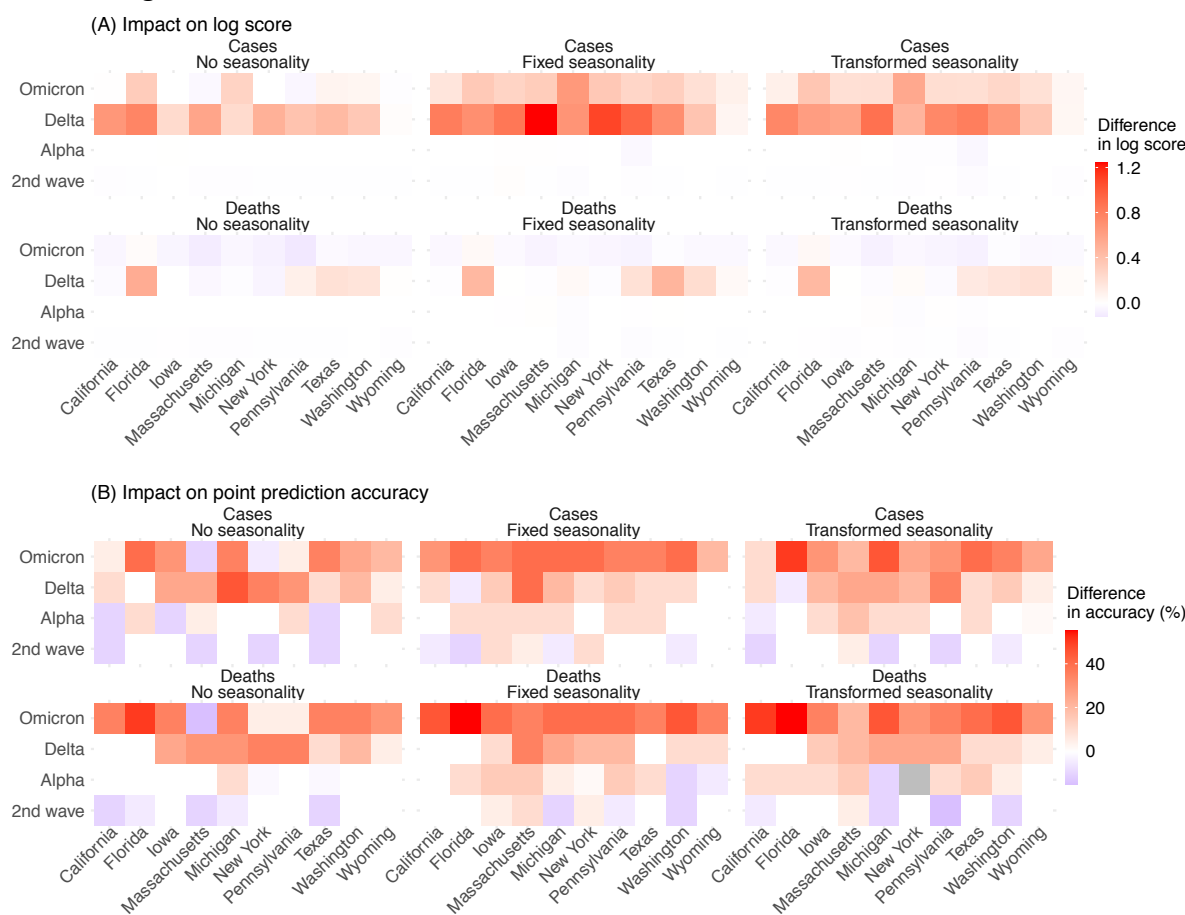

**Fig 5.** Impact of seasonality settings on forecast performance. Heatmaps show the differences in mean log score (A) or point prediction accuracy (B), between pairs of forecast approaches with different seasonality settings (see panel subtitles). All forecasts here were generated using a deflation factor of 0.9 and the new variant setting. Results are aggregated for each forecast target (y-axis) and location (x-axis), over either the respiratory virus season (first 3 columns) or the off season (last 3 columns), for cases (1<sup>st</sup> row) and deaths (2<sup>nd</sup> row), separately. For each pairwise comparison (e.g., fixed vs no seasonality), a positive difference in log score or point prediction accuracy indicates the former approach (e.g., with fixed seasonality) outperforms the latter (e.g., with no seasonality).

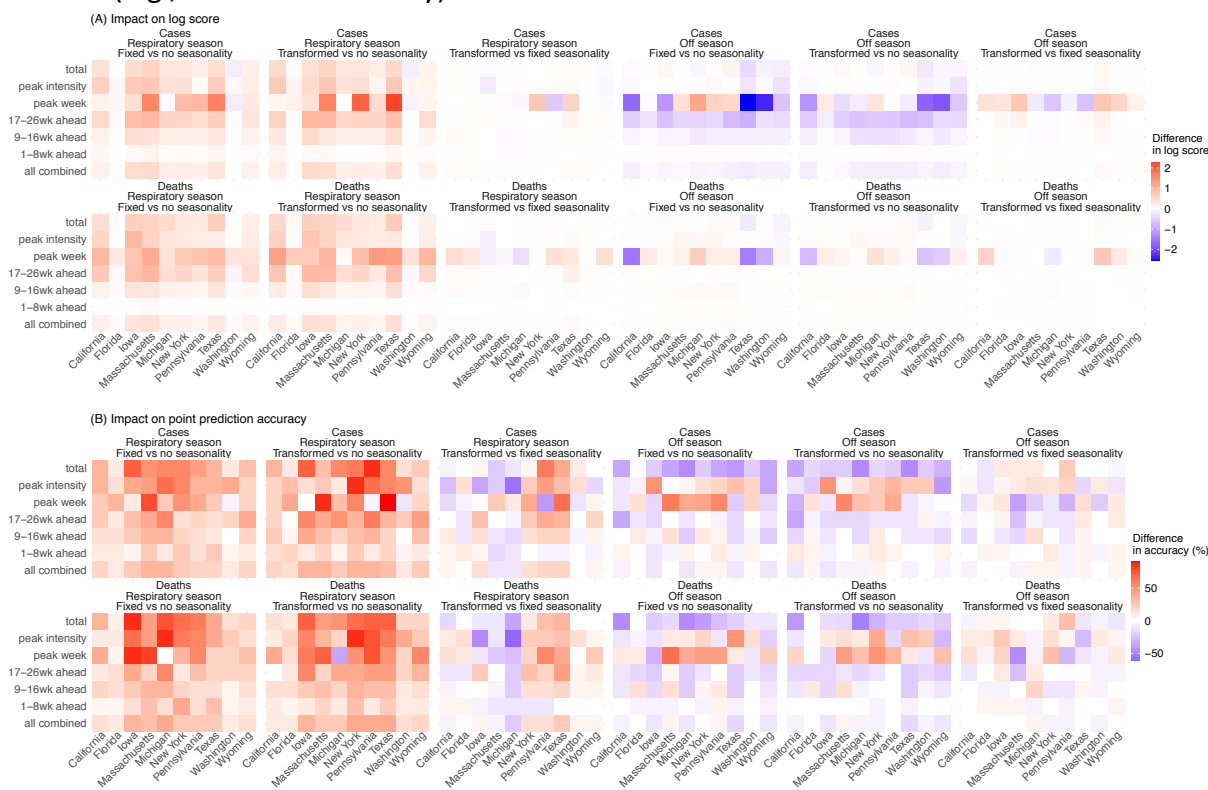

**Fig 6.** Probabilistic forecast accuracy of the best-performing and baseline forecast approaches. Boxplots show the distributions of pair-wise difference in log score by variant period (A) or respiratory virus season (B; see panel subtitles). Results are aggregated by location (color-coded for each state) and forecast target (x-axis), for cases and deaths (see panel subtitles), separately. The numbers show the range of number of evaluations of each forecast target (e.g., 59 predictions of peak week during the pre-Omicron period, for each state; 16-20 predictions of peak week during the Omicron period, depending on the timing of Omicron detection in each state). A positive difference indicates superior log score of the best-performing forecast approach.

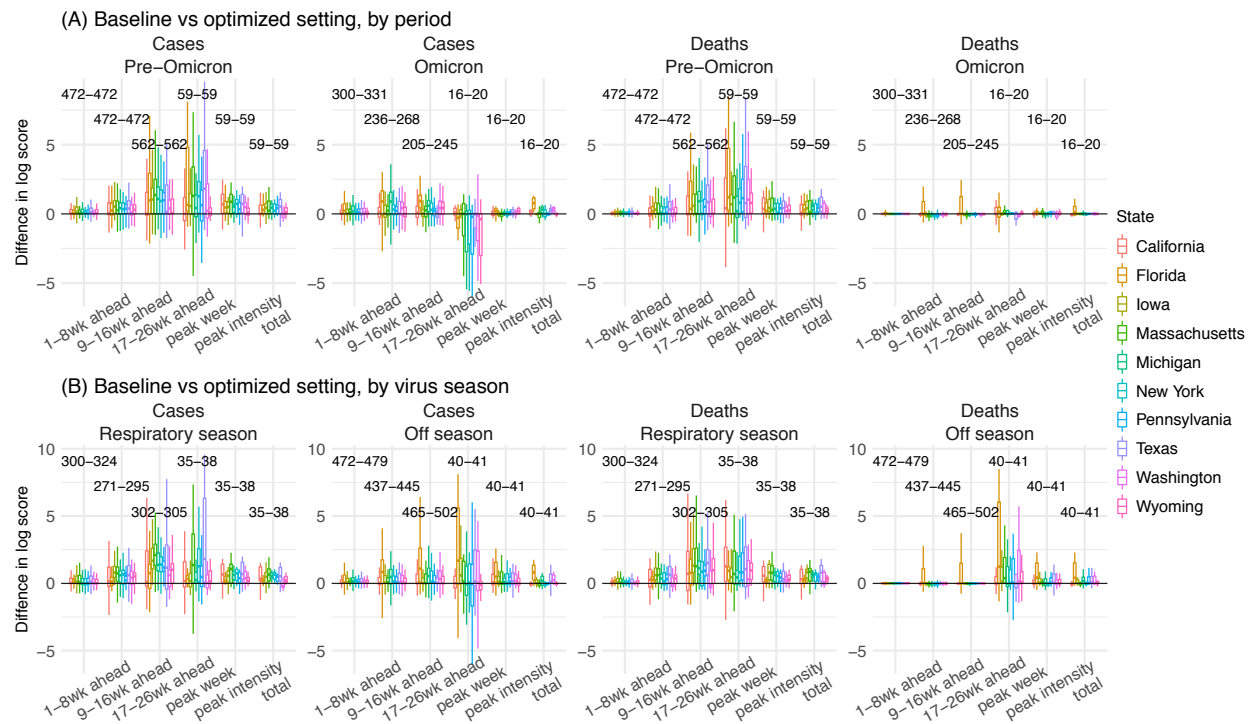

**Fig 7.** Point prediction accuracy of the best-performing and baseline forecast systems. Points show the average accuracy over all forecast weeks (A) or respiratory virus season (B). Results are aggregated by location (x-axis) and forecast target (panel subtitles) for cases (1<sup>st</sup> row) and deaths (2<sup>nd</sup> row, see panel subtitles) separately. Filled dots show the mean accuracy of forecasts generated using the baseline system; filled triangles show the accuracy of forecasts generated using the best-performing forecast system. The lines linking the two accuracies show the changes (mostly increases, as the triangles are more often above the dots), due to the combined application of the three proposed strategies (deflation, new variants, and transformed seasonality settings). Note all forecasts were generated retrospectively; to enable comparison of the model settings, mobility and vaccination data and estimates of infection detection rate and infection fatality risk during the forecast period were used (see main text for detail).

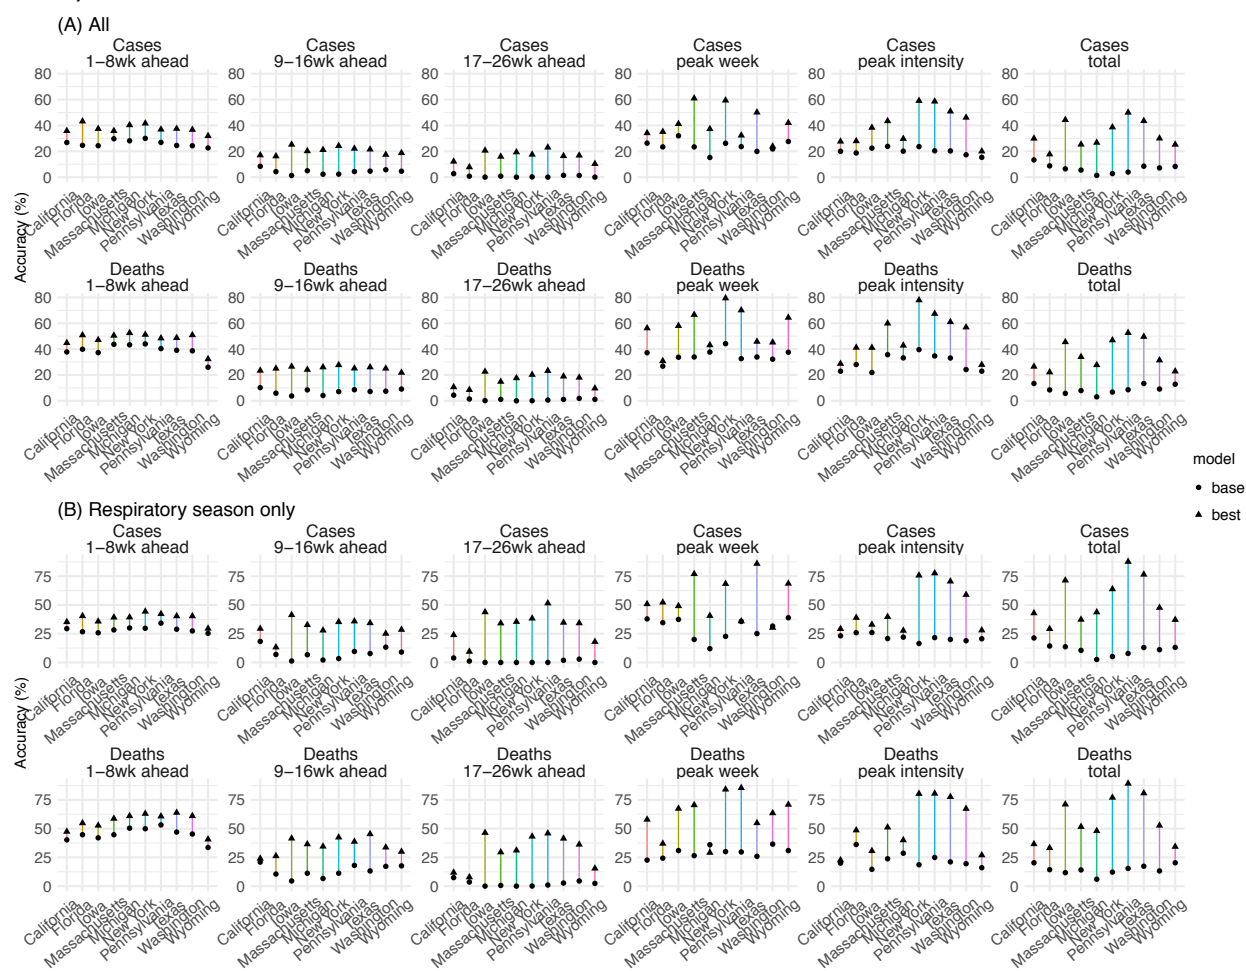

**Fig 8.** Real-time forecasts for the 2022-2023 respiratory virus season. The states are arranged based on accuracy of historical forecast (higher accuracy for those in the left panel and those on the top). In each panel, each row shows estimates and forecasts of weekly numbers of infections (1<sup>st</sup> column), cases (2<sup>nd</sup> column), or deaths (3<sup>rd</sup> column) for each state. Vertical dashed lines indicate the week of forecast initiation (i.e., October 2, 2022). Dots show reported weekly cases or deaths, including for the forecast period. Blue lines and blue areas (line = median; darker blue = 50% CI; lighter blue = 95% CI) show model training estimates. Red lines and red areas (line = median; dark red = 50% Predictive Interval; lighter red = 95% Predictive Interval) show model forecasts using the best-performing approach.

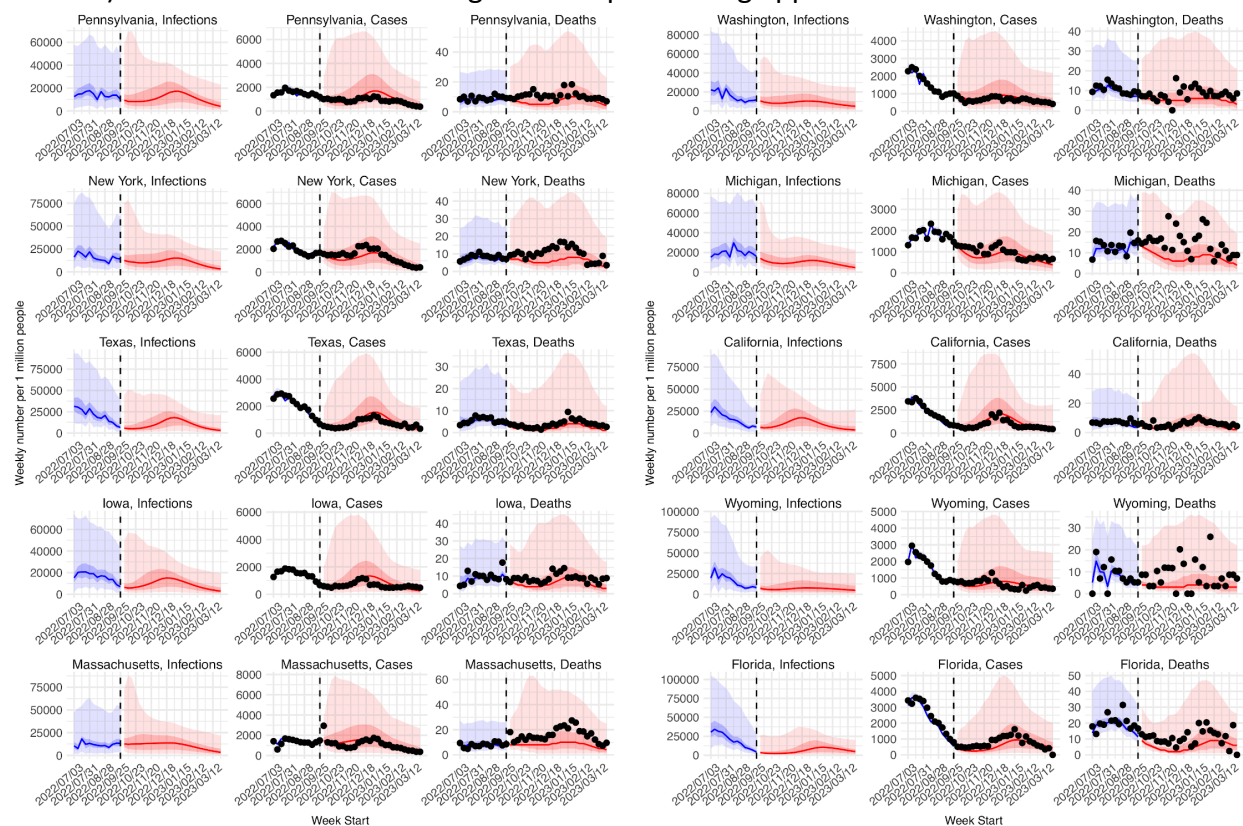



**Fig 9.** Real-time forecasts of cumulative infections, cases, and deaths during the 2022-2023 respiratory virus season. Box plots show distributions of predicted total number of infections (1<sup>st</sup> panel, scaled to population size; i.e. attack rate), cases (2<sup>nd</sup> panel, scaled to population size), and deaths (3<sup>rd</sup> panel, scaled per 1 million persons) from the week starting 10/2/2022 to the week starting 3/26/2023. Thick line = median; box edge = interquartile range; whisker = 95% prediction interval. The states (x-axis label) are arranged according to accuracy of historical forecast (higher accuracy from left to right). Red asterisks (\*) show reported cumulative cases and deaths during the forecast period.

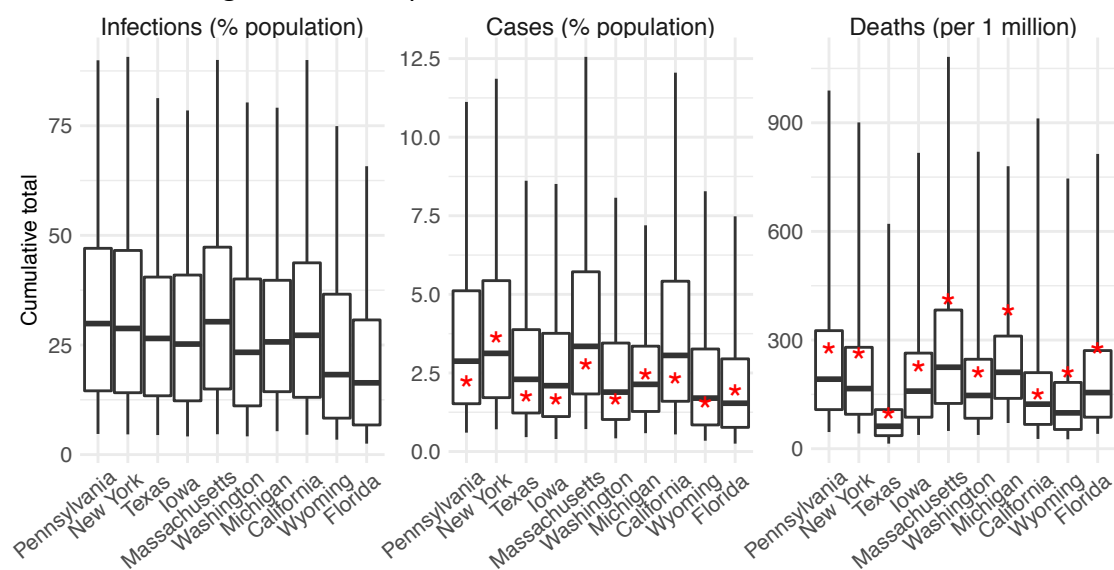

## Tables

**Table 1.** Comparison of probabilistic forecast accuracy by the best-performing and the baseline forecast approaches. Numbers show the relative difference in mean log score computed using Eqn 6, the median of pairwise difference in log score (95% CI of the median); asterisk (\*) indicates if the median is significantly >0 or <0 at the  $\alpha = 0.05$  level, per a Wilcoxon rank sum test. Positive numbers indicate superior performance of the best-performing forecast approach.

| State         | Measure | All                        | Pre-Omicron period         | Omicron period                    | Respiratory season         | Off season                           |
|---------------|---------|----------------------------|----------------------------|-----------------------------------|----------------------------|--------------------------------------|
| All           | Cases   | 63.6%, 0.34 (0.33, 0.35) * | 85.3%, 0.43 (0.42, 0.44) * | 27.2%, 0.21 (0.2, 0.22) *         | 105%, 0.53 (0.51, 0.54) *  | 40.6%, 0.22 (0.21, 0.23) *           |
| All           | Deaths  | 38%, 0.07 (0.06, 0.08) *   | 61.7%, 0.25 (0.24, 0.27) * | 0.184%, -0.018 (-0.02, -0.016) *  | 84.5%, 0.42 (0.41, 0.44) * | 13.7%, 0 (0, 0) *                    |
| California    | Cases   | 46.3%, 0.18 (0.16, 0.21) * | 65.8%, 0.26 (0.22, 0.32) * | 15.9%, 0.11 (0.08, 0.14) *        | 93.7%, 0.35 (0.27, 0.43) * | 21.2%, 0.13 (0.1, 0.15) *            |
| California    | Deaths  | 29.9%, 0.01 (0, 0.01) *    | 50.6%, 0.06 (0.04, 0.1) *  | -1.26%, -0.028 (-0.032, -0.024) * | 91.4%, 0.34 (0.26, 0.42) * | 0.225%, -0.0095 (-0.013, -0.006) *   |
| Florida       | Cases   | 119%, 0.51 (0.46, 0.55) *  | 134%, 0.42 (0.37, 0.49) *  | 90.7%, 0.63 (0.57, 0.68) *        | 48.9%, 0.23 (0.2, 0.27) *  | 183%, 0.77 (0.71, 0.83) *            |
| Florida       | Deaths  | 84.5%, 0.23 (0.2, 0.26) *  | 117%, 0.28 (0.24, 0.33) *  | 33.6%, 0.11 (0.06, 0.18) *        | 58.5%, 0.27 (0.24, 0.31) * | 104%, 0.17 (0.12, 0.26) *            |
| Iowa          | Cases   | 69.8%, 0.4 (0.37, 0.44) *  | 108%, 0.59 (0.55, 0.63) *  | 10.6%, 0.09 (0.06, 0.13) *        | 172%, 0.84 (0.77, 0.89) *  | 24.7%, 0.19 (0.16, 0.22) *           |
| Iowa          | Deaths  | 50.6%, 0.19 (0.16, 0.22) * | 86.4%, 0.43 (0.39, 0.47) * | -4.49%, -0.024 (-0.03, -0.018) *  | 158%, 0.71 (0.66, 0.77) *  | 5.74%, 0 (0, 0.01) *                 |
| Massachusetts | Cases   | 84.1%, 0.42 (0.38, 0.46) * | 131%, 0.66 (0.61, 0.72) *  | 17.6%, 0.17 (0.13, 0.2) *         | 213%, 0.91 (0.83, 0.99) *  | 29%, 0.16 (0.14, 0.19) *             |
| Massachusetts | Deaths  | 40.1%, 0.04 (0.03, 0.06) * | 68.9%, 0.28 (0.23, 0.34) * | -3.32%, -0.031 (-0.041, -0.022) * | 130%, 0.61 (0.55, 0.67) *  | 0.439%, -0.005 (-0.009, -0.002) *    |
| Michigan      | Cases   | 76.4%, 0.48 (0.45, 0.51) * | 86.9%, 0.49 (0.45, 0.52) * | 55.9%, 0.46 (0.4, 0.51) *         | 119%, 0.62 (0.57, 0.68) *  | 53.2%, 0.39 (0.35, 0.42) *           |
| Michigan      | Deaths  | 36.9%, 0.12 (0.09, 0.14) * | 60.9%, 0.32 (0.28, 0.35) * | -2.89%, -0.029 (-0.036, -0.022) * | 85.6%, 0.48 (0.44, 0.52) * | 12.2%, -0.0044 (-0.0095, -0.00048) * |
| New York      | Cases   | 60.7%, 0.37 (0.34, 0.4) *  | 79.6%, 0.47 (0.44, 0.5) *  | 28.8%, 0.22 (0.19, 0.25) *        | 117%, 0.63 (0.57, 0.69) *  | 31.1%, 0.21 (0.18, 0.24) *           |
| New York      | Deaths  | 20.6%, 0.01 (0.01, 0.02) * | 35.5%, 0.09 (0.06, 0.15) * | -4.31%, -0.025 (-0.032, -0.019) * | 61.1%, 0.37 (0.33, 0.4) *  | -0.7%, -0.0056 (-0.009, -0.0029) *   |
| Pennsylvania  | Cases   | 49.2%, 0.32 (0.3, 0.35) *  | 72.4%, 0.45 (0.42, 0.48) * | 12.1%, 0.16 (0.13, 0.18) *        | 94.9%, 0.56 (0.52, 0.6) *  | 24.7%, 0.18 (0.16, 0.2) *            |
| Pennsylvania  | Deaths  | 30.5%, 0.12 (0.09, 0.15) * | 51.7%, 0.3 (0.27, 0.33) *  | -3.29%, -0.024 (-0.034, -0.016) * | 71.9%, 0.41 (0.38, 0.44) * | 8.45%, 0.01 (0, 0.01) *              |
| Texas         | Cases   | 74.3%, 0.32 (0.29, 0.36) * | 120%, 0.51 (0.46, 0.57) *  | 9.88%, 0.07 (0.04, 0.12) *        | 158%, 0.64 (0.56, 0.71) *  | 34%, 0.18 (0.15, 0.21) *             |
| Texas         | Deaths  | 59.3%, 0.17 (0.14, 0.21) * | 103%, 0.47 (0.42, 0.52) *  | -1.88%, -0.012 (-0.015, -0.009) * | 141%, 0.67 (0.6, 0.74) *   | 20.5%, 0.01 (0.01, 0.02) *           |
| Washington    | Cases   | 38.5%, 0.26 (0.23, 0.28) * | 38.8%, 0.24 (0.21, 0.27) * | 37.8%, 0.28 (0.25, 0.32) *        | 31.7%, 0.28 (0.24, 0.32) * | 43.3%, 0.24 (0.2, 0.26) *            |

|            |        |                            |                            |                                   |                            |                                  |
|------------|--------|----------------------------|----------------------------|-----------------------------------|----------------------------|----------------------------------|
| Washington | Deaths | 13.8%, 0 (-0.0015, 0)      | 24.1%, 0.04 (0.02, 0.08) * | -4.22%, -0.028 (-0.034, -0.022) * | 19.1%, 0.07 (0.03, 0.13) * | 10.4%, -0.001 (-0.0029, 0.00093) |
| Wyoming    | Cases  | 34.5%, 0.21 (0.19, 0.23) * | 45.7%, 0.25 (0.23, 0.28) * | 13.4%, 0.11 (0.07, 0.15) *        | 73.8%, 0.42 (0.38, 0.46) * | 13.7%, 0.09 (0.07, 0.12) *       |
| Wyoming    | Deaths | 26.8%, 0.05 (0.04, 0.08) * | 42.7%, 0.19 (0.17, 0.22) * | -1.53%, -0.014 (-0.019, -0.01) *  | 73.9%, 0.36 (0.33, 0.41) * | 3.06%, 0 (0.00094, 0.01) *       |

**Table 2.** Comparison of point prediction accuracy by the best-performing and the baseline forecast approaches. Numbers show the mean point prediction accuracy of forecasts generated using the baseline v. the best-performing forecast approach; asterisk (\*) indicates if the median of pairwise accuracy difference is significantly >0 or <0 at the  $\alpha = 0.05$  level, per a Wilcoxon rank sum test. Note all forecasts were generated retrospectively; to enable comparison of forecast approaches, mobility and vaccination data and estimates of infection detection rate and infection fatality risk during the forecast period were used (see main text for detail).

| State         | Measure | 1-8wk ahead | 9-16wk ahead | 17-26wk ahead | peak week   | peak intensity | total       |
|---------------|---------|-------------|--------------|---------------|-------------|----------------|-------------|
| All           | Cases   | 26% v 38% * | 4% v 20% *   | 1% v 16% *    | 24% v 42% * | 20% v 40% *    | 7% v 33% *  |
| All           | Deaths  | 39% v 48% * | 7% v 25% *   | 1% v 16% *    | 35% v 56% * | 30% v 50% *    | 9% v 36% *  |
| California    | Cases   | 27% v 36% * | 8% v 17% *   | 3% v 12% *    | 26% v 34%   | 20% v 28% *    | 13% v 30% * |
| California    | Deaths  | 38% v 45% * | 10% v 23% *  | 4% v 11% *    | 37% v 56% * | 23% v 29%      | 13% v 26% * |
| Florida       | Cases   | 25% v 43% * | 4% v 16% *   | 1% v 8% *     | 23% v 35% * | 19% v 28% *    | 9% v 18% *  |
| Florida       | Deaths  | 40% v 51% * | 6% v 25% *   | 1% v 8% *     | 27% v 31%   | 28% v 41% *    | 8% v 22% *  |
| Iowa          | Cases   | 24% v 37% * | 1% v 25% *   | 0% v 21% *    | 32% v 41% * | 22% v 38% *    | 6% v 44% *  |
| Iowa          | Deaths  | 37% v 47% * | 4% v 26% *   | 0% v 23% *    | 34% v 58% * | 22% v 41% *    | 6% v 46% *  |
| Massachusetts | Cases   | 30% v 36% * | 5% v 20% *   | 1% v 16% *    | 23% v 61% * | 24% v 43% *    | 5% v 25% *  |
| Massachusetts | Deaths  | 44% v 50% * | 8% v 24% *   | 1% v 15% *    | 34% v 67% * | 36% v 60% *    | 8% v 34% *  |
| Michigan      | Cases   | 28% v 40% * | 2% v 21% *   | 0% v 19% *    | 15% v 37% * | 20% v 30% *    | 1% v 27% *  |
| Michigan      | Deaths  | 43% v 52% * | 4% v 26% *   | 0% v 18% *    | 38% v 43%   | 33% v 43% *    | 3% v 28% *  |
| New York      | Cases   | 30% v 42% * | 2% v 24% *   | 0% v 18% *    | 26% v 59% * | 24% v 59% *    | 3% v 39% *  |
| New York      | Deaths  | 44% v 51% * | 7% v 28% *   | 0% v 20% *    | 44% v 79% * | 40% v 78% *    | 7% v 47% *  |
| Pennsylvania  | Cases   | 27% v 37% * | 4% v 22% *   | 0% v 23% *    | 24% v 32% * | 20% v 59% *    | 4% v 50% *  |
| Pennsylvania  | Deaths  | 40% v 48% * | 9% v 25% *   | 1% v 23% *    | 33% v 70% * | 35% v 67% *    | 9% v 53% *  |
| Texas         | Cases   | 24% v 38% * | 5% v 22% *   | 1% v 16% *    | 20% v 50% * | 20% v 51% *    | 8% v 44% *  |
| Texas         | Deaths  | 39% v 49% * | 7% v 26% *   | 1% v 19% *    | 34% v 46% * | 33% v 61% *    | 13% v 50% * |
| Washington    | Cases   | 24% v 37% * | 6% v 17% *   | 1% v 17% *    | 22% v 24%   | 17% v 46% *    | 7% v 30% *  |
| Washington    | Deaths  | 39% v 51% * | 7% v 25% *   | 2% v 18% *    | 32% v 45% * | 24% v 57% *    | 9% v 31% *  |
| Wyoming       | Cases   | 23% v 32% * | 5% v 19% *   | 0% v 10% *    | 28% v 42% * | 15% v 20% *    | 8% v 25% *  |
| Wyoming       | Deaths  | 26% v 32% * | 9% v 22% *   | 1% v 10% *    | 38% v 64% * | 23% v 28% *    | 13% v 23% * |

**Supporting Information (SI)**  
for  
**Development of Accurate Long-lead COVID-19 Forecast**  
Wan Yang and Jeffrey Shaman

This document includes:

Supplemental Methods

Supplemental Figures S1 – S4

Supplemental Tables S1 – S8

## 1 **SUPPLEMENTAL METHODS**

### 2 **Data sources and processing**

3 For model calibration, we used reported COVID-19 case and mortality data to capture  
4 transmission dynamics, mobility data to represent concurrent NPIs, and vaccination data to  
5 account for changes in population susceptibility due to vaccination. State level COVID-19 case  
6 and mortality data were sourced from the New York Times (NYT) (1) and included all variants. In  
7 our previous studies, overall case/mortality data were sufficient to estimate key  
8 epidemiological parameters when different VOC waves were separated in time (2-4); however,  
9 in the US, the Omicron BA.1 wave overlapped substantially with the Delta wave during  
10 November 2021 – January 2022, making inference challenging. Thus, here we separated the  
11 forecasts into two periods (i.e., a pre-Omicron period combining all non-Omicron variants, and  
12 an Omicron period combining all Omicron subvariants) and used variant-specific case and  
13 mortality data for model training and forecast evaluation for each period. Specifically, we used  
14 variant proportion data sourced from GISAID (5) and compiled by CoVariants.org (6) to  
15 compute the weekly number of cases and deaths due to non-Omicron variants and Omicron,  
16 separately (for simplicity, loosely referred to as variant-specific case and mortality data).  
17 Because only biweekly variant proportion data at the state level were available from  
18 CoVariants.org, we used a spline function to impute weekly variant proportion. To compute  
19 weekly variant-specific cases, we multiplied the NYT weekly case data by the estimated weekly  
20 variant proportion for the same week. To compute weekly variant-specific deaths, we  
21 multiplied the NYT weekly mortality data by the estimated weekly variant proportion three  
22 weeks later (i.e., assuming a 3-week lag from case detection to death; note the 3-week lag was  
23 based on the approximate time lag between the peaks of incidence and mortality time series).

24  
25 Mobility data were derived from Google Community Mobility Reports (7); we aggregated all  
26 business-related categories (i.e., retail and recreational, grocery and pharmacy, transit stations,  
27 and workplaces) in all locations in each state to weekly intervals. State level COVID-19  
28 vaccination data were sourced from Our World in Data (8, 9). For models including seasonality,  
29 weather data (i.e., temperature and humidity) were used to estimate infection seasonality  
30 trends. Hourly surface station temperature and relative humidity came from the Integrated  
31 Surface Dataset (ISD) maintained by the National Oceanic and Atmospheric Administration  
32 (NOAA) and are accessible using the “stationaRy” R package (10, 11). We computed specific  
33 humidity using temperature and relative humidity per the Clausius-Clapeyron equation (12).  
34 We then aggregated these data for all weather stations in each state with measurements since  
35 2000 and calculated the average for each week of the year during 2000-2020.

36  
37

## 38 **Modeling variant-specific vaccine effectiveness (VE) and waning vaccine protection against** 39 **infection**

40 As noted in the main text, the epidemic model in Eqn 1 includes vaccination and waning vaccine  
41 protection. Specifically, vaccination including boosters is represented using the term  $\sum_{k=1}^{k=K} v_{k,t}$ ,  
42 where  $v_{k,t}$  is the number of individuals immunized at time  $t$ , after the  $k$ -th dose ( $k = 1, \dots, 3$  for 2  
43 primary and 1 booster dose here, excluding those immunized after previous doses). We  
44 computed  $v_{k,t}$  using vaccination data and adjusted for the delay in antibody development  
45 (here, 14 days for the 1<sup>st</sup> dose and 7 days for subsequent doses) and variant specific VE (13-17).  
46 Note that while the 2<sup>nd</sup> booster dose has been administered for a subset of the population,  
47 such data have not been made publicly available and thus not included in our model. Further,  
48 given the 2<sup>nd</sup> dose and 3<sup>rd</sup> dose (i.e. 1<sup>st</sup> booster) were administered ~6 months apart (i.e.,  
49 beyond the estimated VE duration against infection (16)), here we combined data for these two  
50 doses. In doing so, we have simplified the model and implicitly assumed that the 3<sup>rd</sup> dose  
51 resumed VE against infection to a level similar to the 2<sup>nd</sup> dose, as the same VE was applied  
52 (Table S8).

53  
54 The model further accounts for waning of vaccine protection against infection, using the term  
55  $\sum_{\tau=0}^{\tau=T} \rho_{\tau} V_{t-\tau}$ . We computed the total number who were vaccinated  $\tau$  days ago and lost  
56 protection on day- $t$  ( $V_{t-\tau}$ ) per the VE waning probability ( $\rho_{\tau}$ ). The probabilities  $\rho_{\tau}$  for time  $\tau = 0, \dots,$   
57  $T$  ( $T$  = the maximum duration from the earliest vaccination rollout; Table S8) were calculated  
58 using VE duration data (16) and  $V_{t-\tau}$  was computed per line 5 of Eqn 1.

## 59 60 **Observation model to account for under-detection and time-lags in COVID-19 outcomes**

61 We computed the number of cases and deaths each week using the model-simulated number  
62 of infections occurring each day to match with the observations, as done in Yang et al. (18).  
63 Briefly, we included 1) a time-lag from infectiousness to detection (i.e., an infection being  
64 diagnosed as a case), drawn from a gamma distribution with a mean of  $T_{d,mean}$  days and a  
65 standard deviation of  $T_{d,sd}$  days, to account for delays in detection; 2) an infection-detection  
66 rate ( $r_t$ ), i.e. the fraction of infections (including subclinical or asymptomatic infections)  
67 reported as cases, to account for under-detection; 3) a time-lag from infectiousness to death;  
68 and 4) an infection-fatality risk ( $IFR_t$ ). Each week, the infection-detection rate ( $r_t$ ), infection-  
69 fatality risk ( $IFR_t$ ), and the two time-to-detection parameters ( $T_{d,mean}$  and  $T_{d,sd}$ ) were estimated  
70 along with other parameters (see main text). The time-lag from infectiousness to death during  
71 the pre-Omicron period was drawn from a gamma distribution with a mean of 14 days and a  
72 standard deviation of 14 days, roughly based on data from New York City (unpublished work).  
73 For the Omicron period, many deaths were identified posthumously; thus, it is difficult to  
74 estimate the time-lag from infection to death for Omicron infections. Here, based on the  
75 slightly longer time-lag between the peaks of case and mortality time series during the Omicron

76 period, we assumed a gamma distribution with a mean of 24 days (i.e., assuming an additional  
77 10-day lag) and a standard deviation of 14 days.

78

79 To compute the model-simulated number of new cases each week, we multiplied the model-  
80 simulated number of new infections per day by the infection-detection rate, and further  
81 distributed these simulated cases in time per the distribution of time-from-infectiousness-to-  
82 detection. Similarly, to compute the model-simulated deaths per week and account for delays  
83 in time to death, we multiplied the simulated-infections by the IFR and then distributed these  
84 simulated deaths in time per the distribution of time-from-infectious-to-death. We then  
85 aggregated these daily numbers to weekly totals to match with the weekly case and mortality  
86 data for model inference, as described in the main text.

87

### 88 **Settings for anticipating the impact of new variants (the new variant approach)**

89 The uncertainty due to the possible emergence or surge of new variants in the future is a major  
90 challenge for long-lead COVID-19 forecast. To address this challenge, we devised a set of  
91 heuristics to anticipate the likely timing and impact of new variant emergence during the  
92 forecast period (i.e., the new variant approach). For the very near future (1- to 5 weeks), we  
93 used available genomic sequencing data (see “Data sources and processing”). Specifically, we  
94 first estimated the growth rate for each circulating variant based on variant proportion 6- to 2  
95 weeks prior to the week of forecast initiation (i.e., assuming a 2-week lag for genomic data  
96 collection); for simplicity, we used a log-linear model [i.e.,  $\log(\text{variant proportion during week-}t) \sim \text{week-}t$ ]. If any variant had a high growth rate (here, arbitrarily set to 10% per week), we  
98 deemed it a rising variant that could further affect the population susceptibility and overall  
99 virus transmissibility. To anticipate its impact, we then used a smoothing spline to 1) project  
100 when the variant would reach a 100% proportion and 2) project the number of weeks for the  
101 variant to grow from 0% to 100%. The first estimate was then used to set the timing of the  
102 continued impact and the second estimate was used to scale the increases in population  
103 susceptibility. Here, arbitrarily, we assumed a baseline of 1.5 – 4.5% increase in susceptibility  
104 for each week the new variant increased in proportion; however, if the estimated growth rate  
105 ( $g$ ) was  $>20\%$ , to account for the faster growth, we scaled that baseline by a factor of  $(1+g)/1.2$ .  
106 While the growth advantage of a new variant could also come from increased transmissibility,  
107 for simplicity, here we opted to solely adjust for population susceptibility. In addition, given the  
108 fast displacement of new variants, we opted not to use projected estimates 5 weeks beyond  
109 the forecast week, i.e. these changes were only applied to the first 5 weeks of a forecast.

110

111 When genomic data could not be used (i.e. beyond the first 5 forecast weeks or when genomic  
112 data were not available), we used the following heuristics to anticipate the likely timing and  
113 impact of a new variant surge:



- 114 i) New variants tend to emerge after a recent large wave (here, defined arbitrarily as a 25%  
115 attack rate over 3 months for the non-Omicron period, and a 33% attack rate over 2 months  
116 for the Omicron period). We identified these times using estimated/forecasted infection  
117 rates during the preceding months and the forecast period.
- 118 ii) New variants tend to emerge and/or become widespread during northern hemisphere  
119 winter (December – February), southern hemisphere winter (June – August), and/or the  
120 monsoon season (e.g. June – September in India) and could be introduced to the US during  
121 these months. We identified these times using calendar month.
- 122 iii) During the above times with potential new variant emergence, the population susceptibility  
123 and virus transmissibility could increase. Accordingly, to account for susceptibility changes,  
124 we resampled half of the model ensemble to increase the population susceptibility by 2-9%  
125 for weeks flagged per the conditions described in i and ii. However, this susceptibility  
126 increase was only triggered when the mean population susceptibility was below 40% to  
127 avoid over-adjustment. Similarly, to avoid the system being trapped in an outbreak-begets-  
128 outbreak cycle, no further adjustments were made to susceptibility if a wave had been  
129 forecast the prior weeks or the cumulative adjustment had exceeded a threshold (here, set  
130 to 40% of the population over 26 weeks for pre-Omicron period and 60% for the Omicron  
131 period). To account for transmissibility changes, we expanded the variance of the  
132 transmission rate (i.e.,  $\beta_t$  in Eqn 1) by applying an inflation factor of 1.3 (pre-Omicron  
133 period) or 1.1 (Omicron period) to ensemble members falling between the 50<sup>th</sup> and 95<sup>th</sup>/90<sup>th</sup>  
134 (pre-Omicron/Omicron period) percentiles (i.e., the ones with higher but not too extreme  
135 values) for weeks identified per the conditions described in i and ii.

136

### 137 **The fixed seasonality model**

138 The fixed seasonality model represents the dependency of respiratory virus survival, including  
139 that of SARS-CoV-2, to temperature and humidity (19, 20) per the following equations:

$$140 \quad R_0(t) = [a_0 q^2(t) + a_1 q(t) + a_2] \left[ \frac{T_c}{T(t)} \right]^{T_{exp}} \text{ (Eqn 3a)}$$

$$141 \quad b_t = \frac{R_0(t)}{\overline{R_0}} \text{ (Eqn 3b)}$$

142

143 As described previously (3, 4), the seasonality function in Eqn 3a assumes that humidity has a  
144 bimodal effect on seasonal risk of infection, with both low and high humidity conditions  
145 favoring transmission [i.e., the parabola in the 1st set of brackets, where  $q(t)$  is weekly specific  
146 humidity measured by local weather stations and  $t = 1, \dots, 52$ , i.e., week 1 to week 52 of the  
147 year]; this effect is further modulated by temperature, with low temperatures promoting  
148 transmission and temperatures above a certain threshold limiting transmission [i.e., the 2nd set  
149 of brackets, where  $T(t)$  is weekly temperature measured by local weather stations and  $T_c$  is the  
150 threshold]. As SARS-CoV-2 specific parameters ( $a_0$ ,  $a_1$ ,  $a_2$ ,  $T_c$ , and  $T_{exp}$  in Eqn 3a) are not  
151 available, we used parameters estimated for influenza (21) and scaled the weekly outputs [i.e.,  
152  $R_0(t)$ ] by the annual mean (i.e.,  $\overline{R_0}$ ) per Eqn 3b, as done in Yang and Shaman (4). In doing so,  
153 the scaled outputs ( $b_t$ ) are no longer specific to influenza; rather, they represent the *relative*,

154 seasonality-related transmissibility by week, general to viruses sharing similar seasonal  
 155 responses. The estimated relative seasonal trend,  $b_t$ , is then used to adjust the relative  
 156 transmission rate at time  $t$  in Eqn 1.

157

### 158 **The transformed seasonality model**

159 The transformed seasonality model transforms the  $b_t$  estimates from Eqn 3b to allow flexibility  
 160 in the seasonal trend. To do so, we include three parameters to fine tune the peak of the  
 161 seasonal trend ( $p_{shift}$ ; i.e., the number of weeks earlier or later than the peak estimated for  
 162 influenza), the number of weeks during a year with  $b_t > 1$  ( $\delta$ ; i.e., the duration with elevated  
 163 infection risk), and another parameter  $b_{t,lwr}$  that adjusts the lowest  $b_t$  value. Specifically, the  
 164 transformation first adjusts values of  $b_t$  greater than 1, by shifting the timing by  $p_{shift}$  weeks  
 165 and adjusting the duration with elevated infection risk to  $\delta$ , per

$$166 \quad b'_{t\{b_t>1\}} = \frac{b_{t\{b_t>1\}} + p_{shift}}{\frac{n_{b_t>1}}{\delta}} \quad (\text{Eqn 4a})$$

167 where  $n_{b_t>1}$  is the number of weeks with  $b_t > 1$  during the 1-year cycle. For weeks with  $b_t \leq 1$ ,  
 168 the transformation adjusts the values, by shifting the timing by  $p_{shift}$  weeks and adjusting the  
 169 duration with lower infection risk to  $52 - \delta$ , per

$$170 \quad b'_{t\{b_t \leq 1\}} = \frac{b_{t\{b_t \leq 1\}} + p_{shift}}{n_{b_t \leq 1} / (52 - \delta)} \quad (\text{Eqn 4b})$$

171 The approach then further scales  $b'_{t\{b_t \leq 1\}}$  to increase the relative infection risk, per

$$172 \quad b''_{t\{b_t \leq 1\}} = 1 - (1 - b'_{t\{b_t \leq 1\}}) \left( \min \left\{ 1, \frac{\min \{ b'_{t\{b_t \leq 1\}} \}}{b_{t,lwr}} \right\} \right) \quad (\text{Eqn 4c})$$

173  $b''_{t\{b_t > 1\}} \equiv b'_{t\{b_t > 1\}}$  and  $b''_{t\{b_t \leq 1\}}$  are then pooled together and scaled to have a mean of 1 over  
 174 the 1-year cycle, per

$$175 \quad b_t''' = \frac{b_t''}{\bar{b_t''}} \quad (\text{Eqn 4d})$$

176

177 There could be multiple combinations of the three parameters (i.e.,  $p_{shift}$ ,  $\delta$ , and  $b_{t,lwr}$ ). Due  
 178 to the lack of SARS-CoV-2 data to inform the parameter estimates, here we opted to optimize  
 179 the range for each parameter (as opposed to estimate specific best-fit parameters). Briefly, we  
 180 tested 2 levels (low vs. high) for each parameter and thus 8 in combination for each state (Fig  
 181 S5). We then identified the best range for each state based on forecast performance during the  
 182 2<sup>nd</sup> wave, i.e., before the surge of SARS-CoV-2 VOCs to minimize potential confounding. The  
 183 best parameter ranges (Fig S5) were then used in the transformed seasonality model in the  
 184 main analysis.

185

### 186 **Additional details on the retrospective forecast and forecast evaluation**

187 As noted in the main text, retrospective forecasts for the non-Omicron period were done  
188 through the week of August 15, 2021. We stopped initiating the non-Omicron forecasts in mid-  
189 August 2021 to allow at least a few weeks of Delta-related data to calibrate the model before  
190 forecasting the Delta wave. However, a 6-month forecast initiated during mid-June – mid-  
191 August 2021 would extend to mid-December 2021 – mid-Feb 2022, when Omicron BA.1 had  
192 become predominant, depending on location; this overlap would lead to lower forecast  
193 accuracy, since here we did not account for the emergence of Omicron BA.1 and fast  
194 displacement of Delta. Given the low number of Delta-associated cases/deaths in 2022, weekly  
195 targets (i.e., 1- to 26- week ahead prediction) for weeks in 2022 were excluded from the  
196 evaluation; however, as Delta was the main circulating variant during the 6-month period for  
197 these forecasts, all the overall targets (i.e., peak week, peak intensity, and cumulative total)  
198 were evaluated based on Delta-specific data and included in the analysis.

199  
200 Both the model inference and forecast were run with  $n = 500$  model realizations (i.e., ensemble  
201 members). The ensemble and its distribution provided probabilistic forecasts for 4 types of  
202 targets here, i.e., 1-to 26-week ahead prediction, peak intensity, peak week, and cumulative  
203 totals over the entire 26-week forecast period. For example, for the 1-week ahead prediction  
204 ( $c_{t+1}$ ), the fraction of ensemble members falling in a given bin  $[c_i, c_{i+1})$  can be used to  
205 represent the forecast probability density, i.e.,  $\Pr(c_{t+1} \in [c_i, c_{i+1})) = n_{\{c_{t+1} \geq c_i \ \& \ c_{t+1} < c_{i+1}\}}/n$ .  
206 Similarly, for the peak week prediction, predicted peak week by individual ensemble members  
207 ( $p_w = 1, 2, \dots, 26$ ) can be aggregated and the distribution can be used to represent the  
208 probability distribution of the forecast, i.e.,  $\Pr(p_w = w) = n_{\{p_w=w\}}/n$ .

209  
210 The forecast probabilities can then be used to compute the log score for evaluation. To do so,  
211 we first binned the forecast ensemble to generate the forecast probability distribution  $\Pr(x)$ ,  
212 e.g.,  $\Pr(c_{t+1})$  for 1-week ahead prediction and  $\Pr(p_w)$  for peak week. Here, for cases, bins of  
213 the weekly targets were set to  $[0, 0.05\%)$ ,  $[0.05\%, 0.1\%)$ , ...,  $[0.95, 1\%)$ , and  $[1\%, 100\%]$  (i.e.,  
214 increments of 0.05%, or 500 per million people, up to 1% of the population; and the rest  
215 combined in the last bin); bins of cumulative cases over 26 weeks were set to  $[0, 2\%)$ ,  
216  $[2\%, 4\%)$ , ...,  $[8\%, 10\%)$ ,  $[10\%, 15\%)$ ,  $[15\%, 20\%)$ , ...,  $[45\%, 50\%)$ , and  $[50\%, 100\%]$  (i.e.,  
217 increments of 2% up to 10%, then increments of 5% up to 50% of the population; and the rest  
218 combined in the last bin). For mortality, bins of the weekly targets were set to  $[0, 0.001\%)$ ,  
219  $[0.001, 0.002)$ , ...,  $[0.019\%, 0.02\%)$ , and  $[0.02\%, 100\%]$  (i.e., increments of 0.001%, or 10 per  
220 million people, up to 0.02% of the population; and the rest combined in the last bin); bins of  
221 cumulative deaths over 26 weeks were set to  $[0, 0.02\%)$ ,  $[0.02\%, 0.04\%)$ , ...,  $[0.08\%, 0.1\%)$ ,  
222  $[0.1\%, 0.15\%)$ ,  $[0.15\%, 0.2\%)$ , ...,  $[0.45\%, 0.5\%)$ , and  $[0.5\%, 100\%]$  (i.e., increments of 0.02%  
223 up to 0.1%, then increments of 0.05% up to 0.5% of the population; and the rest combined in

224 the last bin). For the peak week of both cases and deaths, the bin size was set to 1 week. The  
225 log score was then computed as:

226

$$227 \quad \text{log score} = \log[\text{Pr}(x)_{x \in \text{bin}^*} + \text{Pr}(x)_{x \in \text{bin}^{*-1}} + \text{Pr}(x)_{x \in \text{bin}^{*+1}}] \text{ (Eqn 5)}$$

228

229 where  $\text{Pr}(x)$  is the forecast probability for target  $x$ ;  $\text{bin}^*$  is the bin that contains the observed  
230 value for that target (see bin specifications above) and  $\text{bin}^{*-1}$  and  $\text{bin}^{*+1}$  are the two adjacent  
231 bins. Note that, here we used smaller bins and deemed ensemble members falling within the  
232 bin covering the observation and its two adjacent bins accurate, which is equivalent to using a  
233 single larger bin spanning all those smaller bins. However, as the probabilistic forecasts (i.e.,  
234 probabilities in each bin) were generated and stored before the final evaluation, using smaller  
235 bins allowed more flexible post processing and evaluation if needed (e.g., the log score can be  
236 computed based on a single small bin if preferred).

237

### 238 **References:**

- 239 1. The New York Times (2022) Coronavirus (Covid-19) Data in the United States.  
240 <https://github.com/nytimes/covid-19-data>
- 241 2. Yang W & Shaman JL (2022) COVID-19 pandemic dynamics in South Africa and  
242 epidemiological characteristics of three variants of concern (Beta, Delta, and Omicron).  
243 *Elife* 11.
- 244 3. Yang W & Shaman J (2022) COVID-19 pandemic dynamics in India, the SARS-CoV-2 Delta  
245 variant and implications for vaccination. *J R Soc Interface* 19(191):20210900.
- 246 4. Yang W & Shaman J (2021) Development of a model-inference system for estimating  
247 epidemiological characteristics of SARS-CoV-2 variants of concern. *Nature*  
248 *Communications* 12:5573.
- 249 5. Global Initiative on Sharing All Influenza Data (GISAIID) (2021) Tracking of Variants.  
250 <https://www.gisaid.org/hcov19-variants/>
- 251 6. Anonymous (CoVariants. <https://covariants.org>
- 252 7. Google Inc. (2020) Community Mobility Reports.  
253 <https://www.google.com/covid19/mobility/>
- 254 8. Our World in Data (2022) Data on COVID-19 (coronavirus) vaccinations by Our World in  
255 Data. [https://github.com/owid/covid-19-](https://github.com/owid/covid-19-data/blob/master/public/data/vaccinations/us_state_vaccinations.csv)  
256 [data/blob/master/public/data/vaccinations/us\\_state\\_vaccinations.csv](https://github.com/owid/covid-19-data/blob/master/public/data/vaccinations/us_state_vaccinations.csv)
- 257 9. Mathieu E, *et al.* (2021) A global database of COVID-19 vaccinations. *Nature human*  
258 *behaviour* 5(7):947-953.
- 259 10. Iannone R (2020) Package 'stationaRy'. [https://cran.r-](https://cran.r-project.org/web/packages/stationaRy/stationaRy.pdf)  
260 [project.org/web/packages/stationaRy/stationaRy.pdf](https://cran.r-project.org/web/packages/stationaRy/stationaRy.pdf)
- 261 11. Iannone R (2020) stationaRy. <https://github.com/rich-iannone/stationaRy>
- 262 12. Wallace J & Hobbs P (2006) *Atmospheric Science: An Introductory survey* (Academic  
263 Press, New York) 2nd Edition Ed p 504.

- 264 13. Polack FP, *et al.* (2020) Safety and Efficacy of the BNT162b2 mRNA Covid-19 Vaccine.  
265 *New Engl J Med.*
- 266 14. Baden LR, *et al.* (2021) Efficacy and Safety of the mRNA-1273 SARS-CoV-2 Vaccine. *N*  
267 *Engl J Med* 384(5):403-416.
- 268 15. Haas EJ, *et al.* (2021) Impact and effectiveness of mRNA BNT162b2 vaccine against  
269 SARS-CoV-2 infections and COVID-19 cases, hospitalisations, and deaths following a  
270 nationwide vaccination campaign in Israel: an observational study using national  
271 surveillance data. *The Lancet* 397(10287):1819-1829.
- 272 16. UK Health Security Agency (2022) COVID-19 vaccine surveillance report (Week 17, 28  
273 April 2022).  
274 [https://assets.publishing.service.gov.uk/government/uploads/system/uploads/attachm](https://assets.publishing.service.gov.uk/government/uploads/system/uploads/attachment_data/file/1072064/Vaccine-surveillance-report-week-17.pdf)  
275 [ent\\_data/file/1072064/Vaccine-surveillance-report-week-17.pdf](https://assets.publishing.service.gov.uk/government/uploads/system/uploads/attachment_data/file/1072064/Vaccine-surveillance-report-week-17.pdf)
- 276 17. Kirsebom FCM, *et al.* (COVID-19 vaccine effectiveness against the omicron (BA.2) variant  
277 in England. *The Lancet Infectious Diseases.*
- 278 18. Yang W, *et al.* (2021) Estimating the infection-fatality risk of SARS-CoV-2 in New York  
279 City during the spring 2020 pandemic wave: a model-based analysis. *The Lancet.*  
280 *Infectious diseases* 21(2):203-212.
- 281 19. Biryukov J, *et al.* (2020) Increasing Temperature and Relative Humidity Accelerates  
282 Inactivation of SARS-CoV-2 on Surfaces. *mSphere* 5(4):e00441-00420.
- 283 20. Morris DH, *et al.* (2021) Mechanistic theory predicts the effects of temperature and  
284 humidity on inactivation of SARS-CoV-2 and other enveloped viruses. *Elife* 10.
- 285 21. Yuan H, Kramer SC, Lau EHY, Cowling BJ, & Yang W (2021) Modeling influenza  
286 seasonality in the tropics and subtropics. *PLoS Comput Biol* 17(6):e1009050.  
287

**Fig S1.** Comparison of seasonality forms. For each state (each panel), the blue line shows the estimated trend of seasonal infection risk using Eqns 3a-b and location weather data (temperature and humidity). Grey lines show 100 examples of the transformed seasonal trends per Eqns 4a-d with parameters randomly sampled from the best parameter ranges (Fig S4); the black line shows the mean of the 100 example trends.

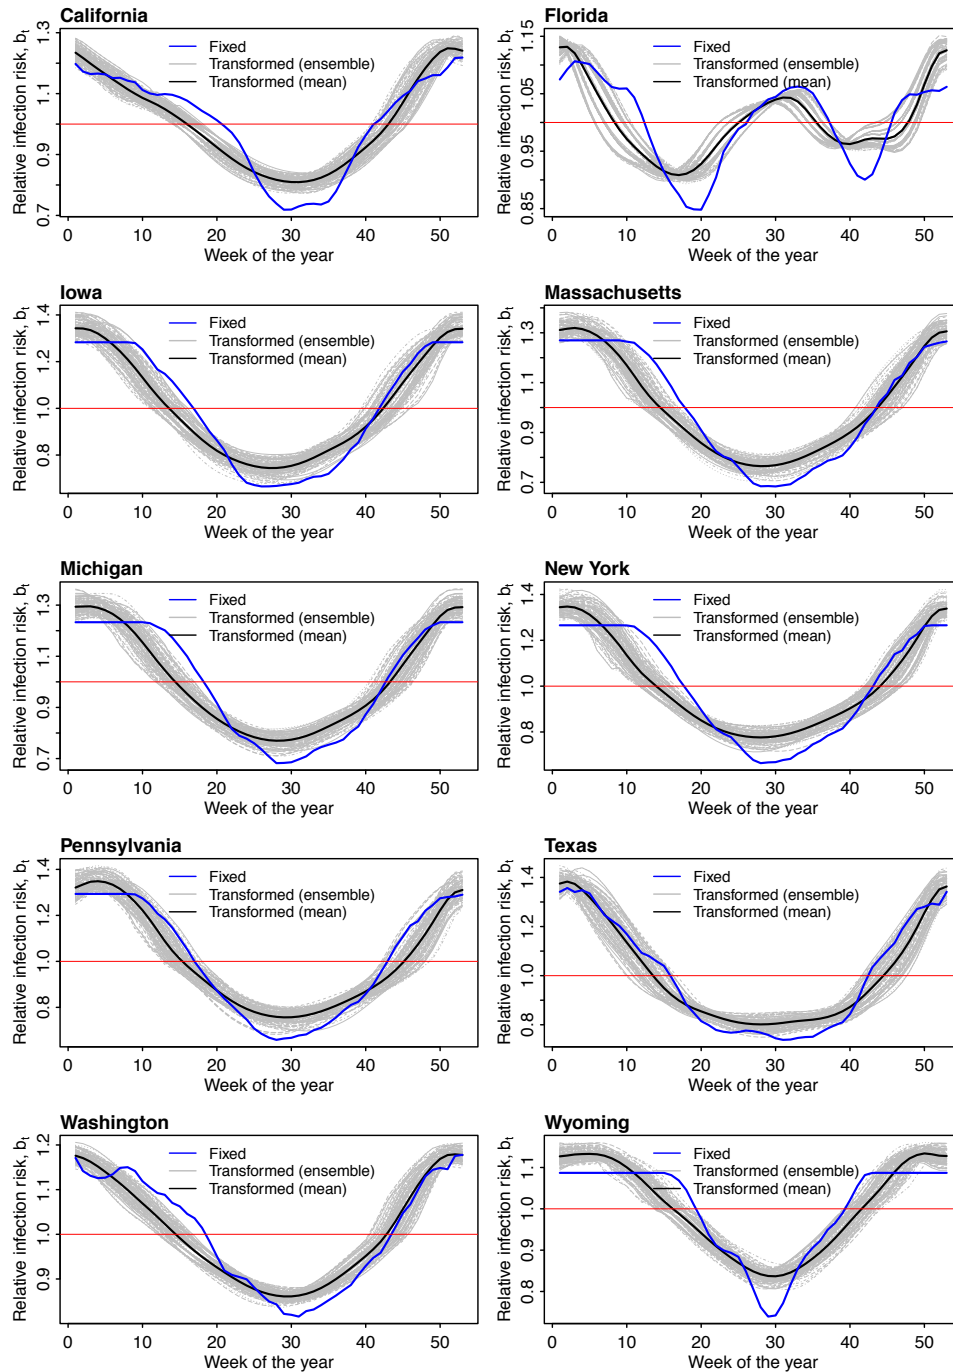

**Fig S2.** Impact of deflation on probabilistic forecast of different targets. Heatmaps show differences in mean log score for cases (A) and deaths (B), between each forecast approach with different deflation settings (deflation factor  $\gamma = 0.95$  vs none in the 1<sup>st</sup> row, 0.9 vs none in the 2<sup>nd</sup> row, and 0.9 vs 0.95 in the 3<sup>rd</sup> row; see panel subtitles). Results are aggregated over all forecast weeks for each type of target (y-axis), forecast approach (see specific settings of new variants and seasonality in subtitles), and location (x-axis). For each pairwise comparison (e.g., 0.95 vs none), a positive difference indicates the former approach (e.g., 0.95) outperforms the latter (e.g., none).

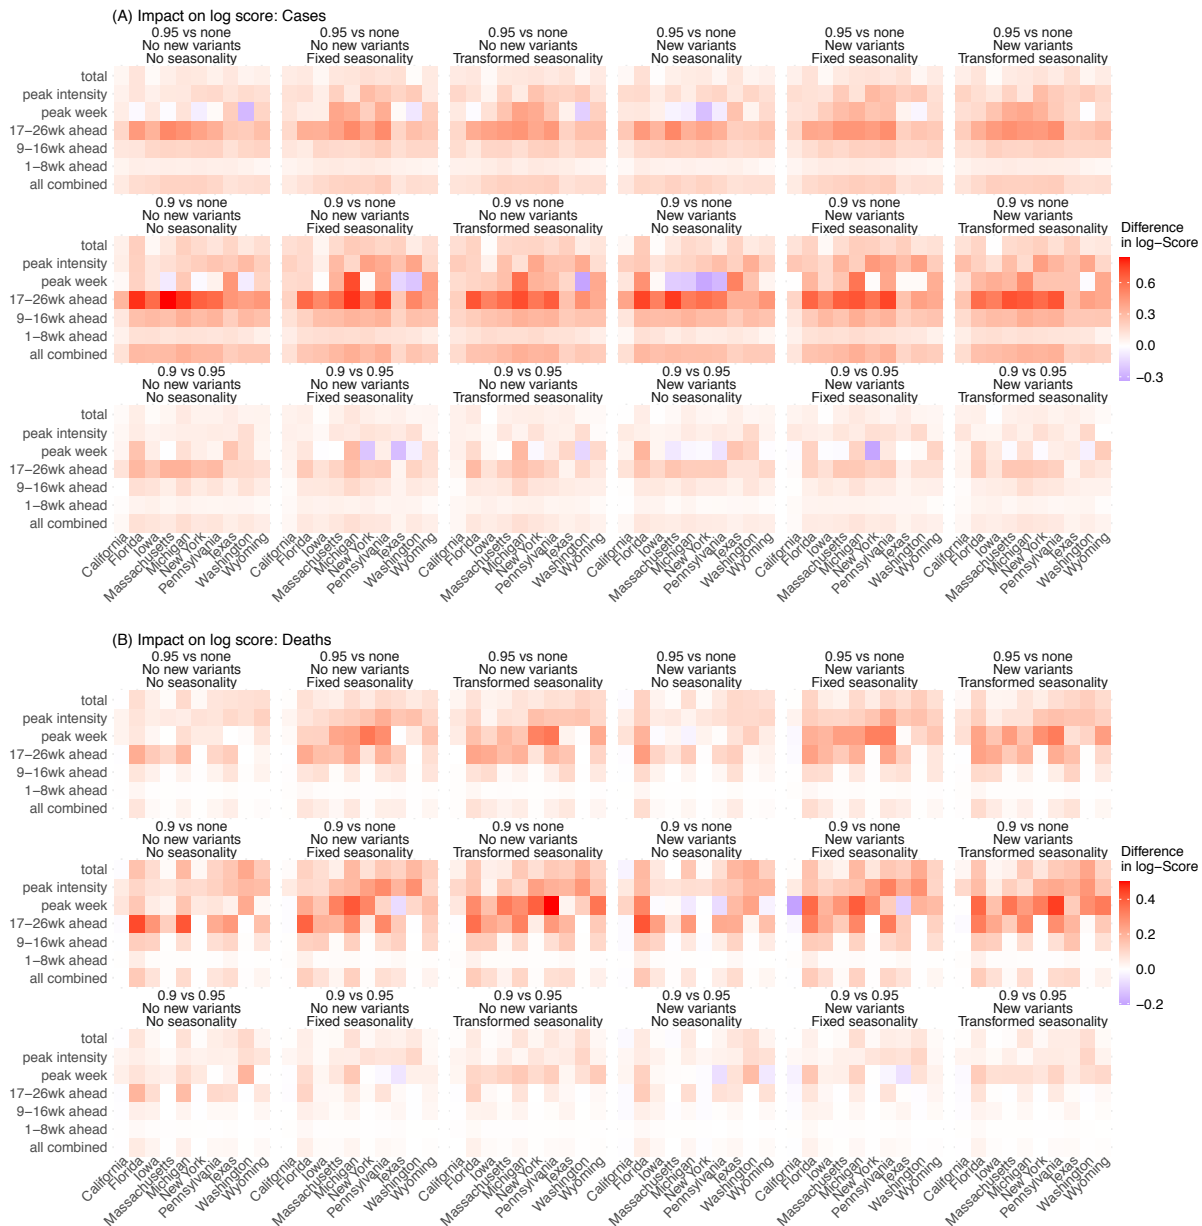

**Fig S3.** Impact of deflation on point estimate accuracy of different targets. Heatmaps show differences in forecast accuracy of point estimates for cases (A) and deaths (B), between each forecast approach with different deflation settings (deflation factor  $\gamma = 0.95$  vs none in the 1<sup>st</sup> row,  $0.9$  vs none in the 2<sup>nd</sup> row, and  $0.9$  vs  $0.95$  in the 3<sup>rd</sup> row; see panel subtitles). Results are aggregated over all forecast weeks for each type of target ( $y$ -axis), forecast approach (see specific settings of new variants and seasonality in subtitles), and location ( $x$ -axis). For each pairwise comparison (e.g.,  $0.95$  vs none), a positive difference indicates the former approach (e.g.,  $0.95$ ) outperforms the latter (e.g., none).

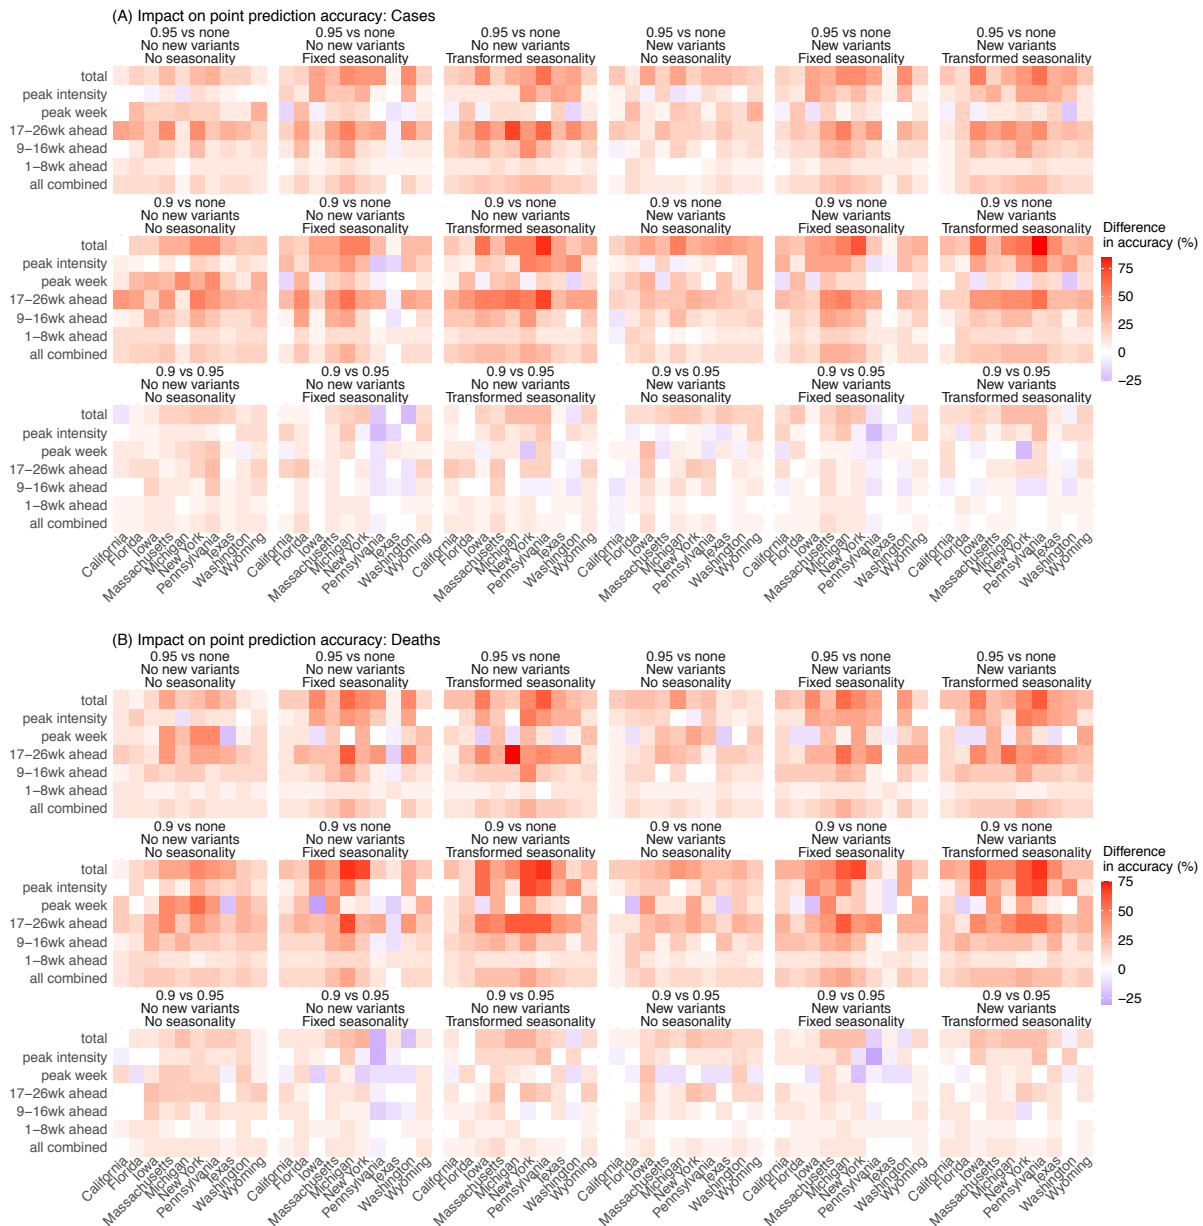



**Fig S4.** Comparison of forecast performance using the transformed seasonality function, with different parameter ranges. The parameter ranges are shown in x-axis labels for the three parameters in Eqn4a-d (from bottom to top:  $p_{shift}$ ,  $\delta$ , and  $b_{t, lwr}$ ). 'x's indicate the best parameter ranges for the corresponding state.

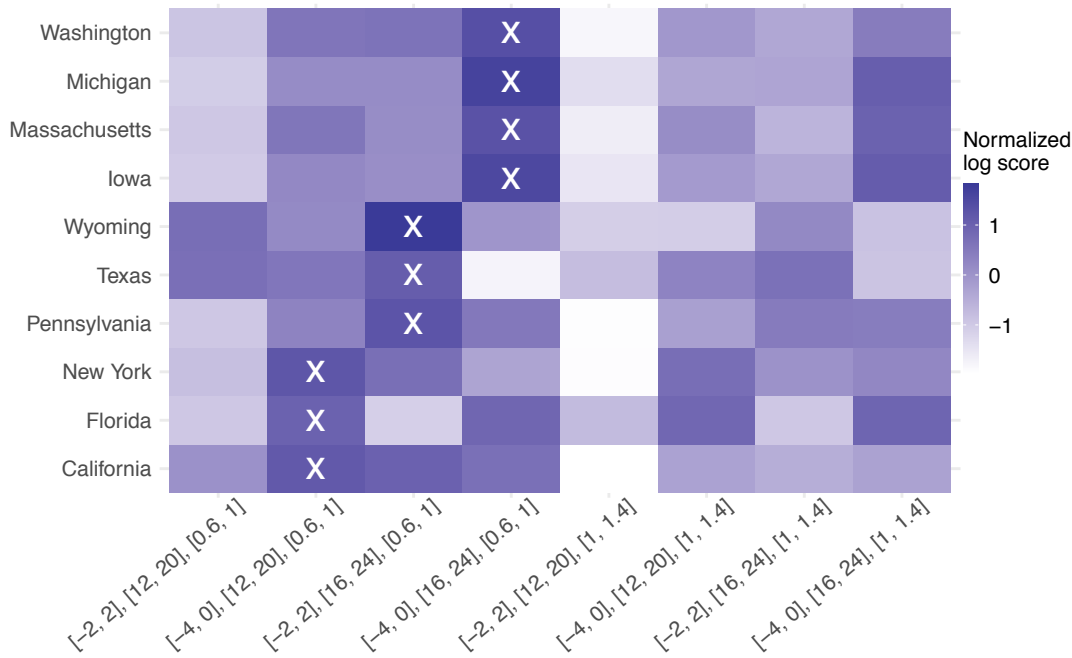

**Table S1.** Impact of deflation. Numbers show the relative difference in mean log score computed using Eqn 6, or relative difference in mean point prediction accuracy computed using Eqn 7. For each pairwise comparison (e.g., 0.95 vs none), a positive difference indicates the former approach (e.g., 0.95) outperforms the latter (e.g., none).

| Metric    | Measure | New variant setting | Seasonality setting     | Pairwise comparison of deflation settings |             |             |
|-----------|---------|---------------------|-------------------------|-------------------------------------------|-------------|-------------|
|           |         |                     |                         | 0.95 vs none                              | 0.9 vs none | 0.9 vs 0.95 |
| Log score | Cases   | No new variants     | No seasonality          | 20.1%                                     | 43.3%       | 19.4%       |
| Log score | Cases   | No new variants     | Fixed seasonality       | 18.1%                                     | 34.2%       | 13.6%       |
| Log score | Cases   | No new variants     | Transformed seasonality | 19%                                       | 36.8%       | 15%         |
| Log score | Cases   | New variants        | No seasonality          | 20.2%                                     | 38.7%       | 15.4%       |
| Log score | Cases   | New variants        | Fixed seasonality       | 19.7%                                     | 35%         | 12.8%       |
| Log score | Cases   | New variants        | Transformed seasonality | 20%                                       | 35.9%       | 13.3%       |
| Log score | Deaths  | No new variants     | No seasonality          | 7.67%                                     | 17.2%       | 8.85%       |
| Log score | Deaths  | No new variants     | Fixed seasonality       | 7.8%                                      | 13.3%       | 5.1%        |
| Log score | Deaths  | No new variants     | Transformed seasonality | 7.94%                                     | 14.2%       | 5.75%       |
| Log score | Deaths  | New variants        | No seasonality          | 7.43%                                     | 15.1%       | 7.19%       |
| Log score | Deaths  | New variants        | Fixed seasonality       | 8.23%                                     | 13%         | 4.45%       |
| Log score | Deaths  | New variants        | Transformed seasonality | 8.4%                                      | 13.2%       | 4.45%       |
| Accuracy  | Cases   | No new variants     | No seasonality          | 28%                                       | 46.5%       | 14.4%       |
| Accuracy  | Cases   | No new variants     | Fixed seasonality       | 30.5%                                     | 38.6%       | 6.23%       |
| Accuracy  | Cases   | No new variants     | Transformed seasonality | 47.8%                                     | 63.2%       | 10.4%       |
| Accuracy  | Cases   | New variants        | No seasonality          | 20.5%                                     | 32.5%       | 10%         |
| Accuracy  | Cases   | New variants        | Fixed seasonality       | 38.3%                                     | 47.2%       | 6.45%       |
| Accuracy  | Cases   | New variants        | Transformed seasonality | 47%                                       | 55%         | 5.44%       |
| Accuracy  | Deaths  | No new variants     | No seasonality          | 15.5%                                     | 27%         | 9.98%       |
| Accuracy  | Deaths  | No new variants     | Fixed seasonality       | 20%                                       | 24.6%       | 3.84%       |
| Accuracy  | Deaths  | No new variants     | Transformed seasonality | 26.8%                                     | 36%         | 7.22%       |
| Accuracy  | Deaths  | New variants        | No seasonality          | 14.7%                                     | 24.1%       | 8.18%       |
| Accuracy  | Deaths  | New variants        | Fixed seasonality       | 26.1%                                     | 34.1%       | 6.36%       |
| Accuracy  | Deaths  | New variants        | Transformed seasonality | 31.2%                                     | 39.9%       | 6.62%       |

**Table S2.** Impact of new variants settings. Numbers show the relative difference in mean log score computed using Eqn 6, or relative difference in mean point prediction accuracy computed using Eqn 7, by variant wave. A positive number indicates superior performance of the forecast approach with anticipation of new variant emergence.

| Metric    | Measure | Seasonality setting     | 2nd wave | Alpha    | Delta | Omicron |
|-----------|---------|-------------------------|----------|----------|-------|---------|
| Log score | Cases   | No seasonality          | -2.09%   | 0.0271%  | 66.9% | 10.5%   |
| Log score | Cases   | Fixed seasonality       | -0.573%  | -0.33%   | 119%  | 36.6%   |
| Log score | Cases   | Transformed seasonality | -1.07%   | -1.03%   | 93.7% | 34.1%   |
| Log score | Deaths  | No seasonality          | -1.7%    | 0.00306% | 19.1% | -5.31%  |
| Log score | Deaths  | Fixed seasonality       | -0.387%  | -0.291%  | 34.1% | -2.27%  |
| Log score | Deaths  | Transformed seasonality | -0.918%  | -0.651%  | 27.8% | -2.73%  |
| Accuracy  | Cases   | No seasonality          | -1.52%   | -0.11%   | 89.1% | 37.1%   |
| Accuracy  | Cases   | Fixed seasonality       | 0.578%   | 2.16%    | 16.8% | 95.8%   |
| Accuracy  | Cases   | Transformed seasonality | -1.33%   | 1.96%    | 26.1% | 77.8%   |
| Accuracy  | Deaths  | No seasonality          | -1.45%   | 0.121%   | 69.9% | 40.2%   |
| Accuracy  | Deaths  | Fixed seasonality       | -0.278%  | 2.73%    | 15.9% | 67.7%   |
| Accuracy  | Deaths  | Transformed seasonality | -1.31%   | 2.47%    | 22.5% | 63.2%   |

**Table S3.** Impact of seasonality, aggregated over all 10 states. Numbers show the relative difference in mean log score or point prediction accuracy, the median of pair-wise difference in log score (95% CI of the median); asterisk (\*) indicates if the median is significantly >0 or <0 at the  $\alpha = 0.05$  level, per a Wilcoxon rank sum test. A positive difference indicates superior log score or point prediction accuracy of the first listed approach; a negative difference indicates superior log score or point prediction accuracy of the second listed approach.

| Wave     | Season             | Metric    | Measure | Fixed vs no seasonality            | Transformed vs no seasonality  | Transformed vs fixed seasonality    |
|----------|--------------------|-----------|---------|------------------------------------|--------------------------------|-------------------------------------|
| All      | All                | Log score | Cases   | -4.45%, -0.0075 (-0.012, -0.0034)* | -2.8%, -0.006 (-0.01, -0.002)* | 1.73%, 0.01 (0, 0.01)*              |
| All      | All                | Log score | Deaths  | 12.7%, 0.04 (0.04, 0.04)*          | 14.2%, 0.04 (0.04, 0.04)*      | 1.32%, -0.0015 (-0.002, -0.00054)*  |
| All      | All                | Accuracy  | Cases   | 20.4%, 10% (10%, 10%)              | 26.3%, 10% (10%, 10%)          | 4.92%, 0% (0%, 5%)*                 |
| All      | All                | Accuracy  | Deaths  | 15.8%, 10% (9.99%, 10%)            | 18.2%, 10% (10%, 10%)          | 2.09%, 0% (0%, 0%)*                 |
| All      | Respiratory season | Log score | Cases   | 39.8%, 0.19 (0.18, 0.2)            | 42.3%, 0.2 (0.18, 0.21)        | 1.8%, 0.01 (0, 0.01)*               |
| All      | Respiratory season | Log score | Deaths  | 37.4%, 0.16 (0.15, 0.17)           | 41.1%, 0.17 (0.15, 0.18)       | 2.64%, 0.01 (0, 0.01)*              |
| All      | Respiratory season | Accuracy  | Cases   | 60.3%, 20% (20%, 25%)              | 75.3%, 25% (25%, 30%)          | 9.38%, 5.01% (5%, 5%)               |
| All      | Respiratory season | Accuracy  | Deaths  | 47.3%, 25% (20%, 25%)              | 54.3%, 25% (25%, 30%)          | 4.76%, 5% (0%, 5%)                  |
| All      | Off season         | Log score | Cases   | -25.9%, -0.14 (-0.14, -0.13)*      | -24.6%, -0.14 (-0.16, -0.13)*  | 1.68%, 0 (0, 0.01)*                 |
| All      | Off season         | Log score | Deaths  | -1.3%, 0.02 (0.02, 0.03)*          | -0.86%, 0.02 (0.02, 0.02)*     | 0.444%, -0.0031 (-0.0036, -0.0025)* |
| All      | Off season         | Accuracy  | Cases   | -5.95%, -5% (-5%, 0%)*             | -6.04%, 0% (-4.99%, 0%)*       | -0.0987%, 0% (0%, 0.01%)*           |
| All      | Off season         | Accuracy  | Deaths  | -6.77%, -5% (-5%, -4.99%)*         | -7.64%, -4.99% (-5%, -5%)*     | -0.94%, 0% (0%, 0.01%)*             |
| 2nd wave | Off season         | Log score | Cases   | 32%, 0.22 (0.2, 0.24)              | 23.5%, 0.16 (0.14, 0.17)       | -6.42%, -0.056 (-0.063, -0.051)*    |
| 2nd wave | Off season         | Log score | Deaths  | 23.9%, 0.17 (0.16, 0.19)           | 17.1%, 0.13 (0.12, 0.14)       | -5.5%, -0.048 (-0.052, -0.043)*     |
| 2nd wave | Off season         | Accuracy  | Cases   | 37.6%, 15% (15%, 20%)              | 35.6%, 20% (15%, 20%)          | -1.43%, -0.01% (-5%, 0%)*           |

|          |            |           |        |                               |                              |                                     |
|----------|------------|-----------|--------|-------------------------------|------------------------------|-------------------------------------|
| 2nd wave | Off season | Accuracy  | Deaths | 45.6%, 25% (20%, 30%)*        | 28.1%, 20% (15%, 20%)*       | -12%, -10% (-15%, -10%)*            |
| Alpha    | Off season | Log score | Cases  | -9.35%, 0.01 (0, 0.01)*       | -24.7%, -0.052 (-0.11, 0)*   | -16.9%, -0.087 (-0.11, -0.052)*     |
| Alpha    | Off season | Log score | Deaths | -3.33%, 0.01 (0.01, 0.01)*    | -10.8%, 0.01 (0.01, 0.02)*   | -7.74%, 0 (0, 0)*                   |
| Alpha    | Off season | Accuracy  | Cases  | -42.4%, -30% (-35%, -25%)*    | -39.8%, -30% (-35%, -25%)*   | 4.52%, 5% (-0.01%, 5.01%)           |
| Alpha    | Off season | Accuracy  | Deaths | -28.5%, -25% (-25%, -20%)*    | -33.8%, -30% (-30%, -25%)*   | -7.53%, -5.01% (-10%, 0%)*          |
| Delta    | Off season | Log score | Cases  | -49.6%, -0.57 (-0.61, -0.55)* | -35.4%, -0.32 (-0.35, -0.3)* | 28.2%, 0.25 (0.23, 0.26)            |
| Delta    | Off season | Log score | Deaths | -12%, 0.02 (0.02, 0.02)*      | -6.52%, 0.02 (0.02, 0.02)*   | 6.28%, -0.0024 (-0.003, -0.0015)*   |
| Delta    | Off season | Accuracy  | Cases  | -55.8%, -25% (-25%, -20%)*    | -50%, -20% (-25%, -20%)*     | 13.1%, 4.99% (0%, 5%)*              |
| Delta    | Off season | Accuracy  | Deaths | -50.3%, -25% (-25%, -20%)*    | -43.2%, -20% (-20%, -15%)*   | 14.5%, 5% (4.99%, 10%)*             |
| Omicron  | Off season | Log score | Cases  | -19.5%, -0.15 (-0.16, -0.14)* | -24%, -0.16 (-0.17, -0.15)*  | -5.68%, -0.013 (-0.017, -0.0085)*   |
| Omicron  | Off season | Log score | Deaths | 4.77%, 0.03 (0.03, 0.03)*     | 3.84%, 0.02 (0.02, 0.03)*    | -0.887%, -0.0035 (-0.0041, -0.003)* |
| Omicron  | Off season | Accuracy  | Cases  | 4.46%, 0.01% (0%, 5%)*        | 2.52%, 0% (0%, 5%)*          | -1.86%, -0.01% (0%, 0%)*            |
| Omicron  | Off season | Accuracy  | Deaths | -1.59%, 0% (0%, 0%)*          | -1.78%, 0% (0%, 0%)*         | -0.191%, -0.01% (0%, 0%)*           |

**Table S4.** Impact of seasonality, by state. Numbers show the relative difference in mean log score or point prediction accuracy, the median of pair-wise difference in log score (95% CI of the median); asterisk (\*) indicates if the median is significantly >0 or <0 at the  $\alpha = 0.05$  level, per a Wilcoxon rank sum test. A positive difference indicates superior log score or point prediction accuracy of the first listed approach; a negative difference indicates superior log score or point prediction accuracy of the second listed approach.

| State      | Season             | Metric    | Measure | Fixed vs no seasonality          | Transformed vs no seasonality    | Transformed vs fixed seasonality  |
|------------|--------------------|-----------|---------|----------------------------------|----------------------------------|-----------------------------------|
| California | All                | Log score | Cases   | -7.14%, -0.042 (-0.062, -0.024)* | -1.53%, -0.028 (-0.045, -0.013)* | 6.04%, 0.02 (0.01, 0.02)*         |
| California | All                | Log score | Deaths  | 16.7%, 0.04 (0.04, 0.05)*        | 21.4%, 0.04 (0.03, 0.04)*        | 3.96%, 0 (0, 0.01)*               |
| California | All                | Accuracy  | Cases   | 13.1%, 5% (0%, 9.99%)            | 11.3%, 5% (0%, 10%)              | -1.6%, 0% (0%, 0%)*               |
| California | All                | Accuracy  | Deaths  | 4.74%, 0% (0.01%, 5%)*           | 1.86%, 0% (-0.01%, 5%)*          | -2.75%, 0% (-4.99%, 0%)*          |
| California | Respiratory season | Log score | Cases   | 42.5%, 0.17 (0.13, 0.22)         | 56.7%, 0.24 (0.19, 0.3)          | 9.96%, 0.05 (0.04, 0.06)*         |
| California | Respiratory season | Log score | Deaths  | 48.4%, 0.21 (0.15, 0.3)          | 60%, 0.27 (0.19, 0.37)           | 7.8%, 0.03 (0.02, 0.04)*          |
| California | Respiratory season | Accuracy  | Cases   | 51.9%, 20% (15%, 20%)            | 58.9%, 20% (15%, 25%)            | 4.61%, 4.99% (-0.01%, 5%)*        |
| California | Respiratory season | Accuracy  | Deaths  | 27.9%, 15% (10%, 20%)            | 22.4%, 10% (5%, 15%)             | -4.33%, -5% (-10%, 0%)*           |
| California | Off season         | Log score | Cases   | -30.3%, -0.17 (-0.2, -0.14)*     | -27.9%, -0.19 (-0.23, -0.16)*    | 3.49%, -0.0024 (-0.013, 0)*       |
| California | Off season         | Log score | Deaths  | -0.598%, 0.03 (0.02, 0.03)*      | 0.856%, 0.02 (0.02, 0.03)*       | 1.46%, -1e-05 (-0.0014, 0.00098)* |
| California | Off season         | Accuracy  | Cases   | -11%, -5% (-10%, 0%)*            | -18.4%, -9.99% (-15%, -5.01%)*   | -8.21%, -5% (-10%, 0%)*           |
| California | Off season         | Accuracy  | Deaths  | -8.26%, -5% (-10%, 0%)*          | -9.65%, -5% (-10%, -5%)*         | -1.52%, 0% (-4.99%, 5%)*          |
| Florida    | All                | Log score | Cases   | -12.6%, -0.02 (-0.032, -0.01)*   | -6.11%, 0.001 (-0.0085, 0.01)*   | 7.47%, 0.03 (0.02, 0.04)*         |
| Florida    | All                | Log score | Deaths  | 0.697%, 0.02 (0.01, 0.02)*       | 4.42%, 0.02 (0.02, 0.03)*        | 3.7%, 0.01 (0.01, 0.01)*          |
| Florida    | All                | Accuracy  | Cases   | 8.52%, 5% (5%, 10%)              | 11.5%, 5% (5%, 10%)              | 2.74%, 0% (0%, 5%)*               |
| Florida    | All                | Accuracy  | Deaths  | 3.73%, 5% (0%, 5.01%)            | 4.9%, 5% (0%, 5.01%)             | 1.14%, 0% (0%, 0%)*               |
| Florida    | Respiratory season | Log score | Cases   | -2.01%, 0.03 (0.02, 0.05)*       | 1.72%, 0.04 (0.02, 0.05)*        | 3.81%, 0.02 (0.01, 0.04)*         |

|         |                    |           |        |                                  |                                |                                    |
|---------|--------------------|-----------|--------|----------------------------------|--------------------------------|------------------------------------|
| Florida | Respiratory season | Log score | Deaths | 2.77%, 0.05 (0.04, 0.06)         | 8.52%, 0.06 (0.04, 0.07)       | 5.59%, 0.03 (0.02, 0.04)*          |
| Florida | Respiratory season | Accuracy  | Cases  | 19%, 10% (9.99%, 15%)            | 20.7%, 15% (10%, 20%)          | 1.44%, 0% (-5%, 5%)*               |
| Florida | Respiratory season | Accuracy  | Deaths | 11.8%, 10% (9.99%, 15%)          | 12.9%, 10% (5%, 15%)           | 0.958%, 0% (-5%, 4.99%)*           |
| Florida | Off season         | Log score | Cases  | -19.1%, -0.066 (-0.088, -0.046)* | -11%, -0.02 (-0.037, -0.0059)* | 10%, 0.03 (0.02, 0.05)*            |
| Florida | Off season         | Log score | Deaths | -0.675%, 0.01 (0.01, 0.01)*      | 1.75%, 0.01 (0.01, 0.02)*      | 2.44%, 0 (0.00049, 0)*             |
| Florida | Off season         | Accuracy  | Cases  | 2.1%, 0% (0%, 5%)*               | 5.84%, 5% (0%, 5%)             | 3.66%, 0% (0.01%, 5%)*             |
| Florida | Off season         | Accuracy  | Deaths | -1.82%, 0% (-5%, 0%)*            | -0.565%, 0% (0%, 4.99%)*       | 1.28%, 0.01% (0%, 4.99%)*          |
| Iowa    | All                | Log score | Cases  | 1.02%, 0.02 (0.01, 0.03)*        | 6.96%, 0.03 (0.02, 0.04)*      | 5.89%, 0.02 (0.01, 0.03)*          |
| Iowa    | All                | Log score | Deaths | 23.6%, 0.07 (0.06, 0.08)         | 25.7%, 0.06 (0.05, 0.07)       | 1.64%, -0.001 (-0.0031, 5e-04)*    |
| Iowa    | All                | Accuracy  | Cases  | 12.9%, 5% (0%, 10%)              | 28.3%, 10% (10%, 15%)          | 13.7%, 10% (5%, 10%)               |
| Iowa    | All                | Accuracy  | Deaths | 17.8%, 10% (5%, 10%)             | 22.7%, 10% (10%, 15%)          | 4.19%, 5% (0.01%, 5.01%)           |
| Iowa    | Respiratory season | Log score | Cases  | 77.8%, 0.47 (0.4, 0.53)          | 77.4%, 0.48 (0.42, 0.54)       | -0.246%, 0.01 (-0.003, 0.02)*      |
| Iowa    | Respiratory season | Log score | Deaths | 72.9%, 0.38 (0.31, 0.46)         | 76.2%, 0.44 (0.36, 0.5)        | 1.95%, 0.01 (-0.001, 0.02)*        |
| Iowa    | Respiratory season | Accuracy  | Cases  | 71.5%, 25% (20%, 25%)            | 112%, 35% (30%, 40%)           | 23.4%, 15% (9.99%, 15%)            |
| Iowa    | Respiratory season | Accuracy  | Deaths | 81%, 35% (30%, 35%)              | 88.7%, 35% (30%, 40%)          | 4.26%, 5% (0.01%, 10%)             |
| Iowa    | Off season         | Log score | Cases  | -30.2%, -0.11 (-0.14, -0.076)*   | -23.2%, -0.076 (-0.1, -0.05)*  | 10.1%, 0.02 (0.01, 0.03)*          |
| Iowa    | Off season         | Log score | Deaths | -0.723%, 0.03 (0.03, 0.04)*      | 0.71%, 0.03 (0.03, 0.03)*      | 1.44%, -0.0035 (-0.0055, -0.0025)* |
| Iowa    | Off season         | Accuracy  | Cases  | -17.6%, -10% (-15%, -5%)*        | -14.9%, -10% (-10%, -4.99%)*   | 3.29%, 0% (0%, 5%)*                |
| Iowa    | Off season         | Accuracy  | Deaths | -18.8%, -10% (-15%, -10%)*       | -15.5%, -10% (-15%, -5.01%)*   | 4.1%, 0% (0%, 5%)*                 |

|               |                    |           |        |                                 |                                  |                                   |
|---------------|--------------------|-----------|--------|---------------------------------|----------------------------------|-----------------------------------|
| Massachusetts | All                | Log score | Cases  | 8.31%, 0.05 (0.03, 0.07)        | 4.64%, 0.02 (0, 0.03)*           | -3.39%, -0.03 (-0.038, -0.023)*   |
| Massachusetts | All                | Log score | Deaths | 30%, 0.11 (0.1, 0.12)           | 28.8%, 0.08 (0.07, 0.09)         | -0.937%, -0.015 (-0.018, -0.012)* |
| Massachusetts | All                | Accuracy  | Cases  | 49.1%, 20% (15%, 25%)           | 33.5%, 15% (10%, 15%)            | -10.4%, -10% (-10%, -5%)*         |
| Massachusetts | All                | Accuracy  | Deaths | 34.7%, 20% (15%, 20%)           | 28.1%, 15% (10%, 20%)            | -4.87%, -5% (-5%, 0%)*            |
| Massachusetts | Respiratory season | Log score | Cases  | 83.6%, 0.5 (0.44, 0.57)         | 78%, 0.45 (0.39, 0.52)           | -3.05%, -0.034 (-0.044, -0.023)*  |
| Massachusetts | Respiratory season | Log score | Deaths | 72.7%, 0.42 (0.34, 0.49)        | 71%, 0.41 (0.35, 0.48)           | -0.976%, -0.021 (-0.028, -0.015)* |
| Massachusetts | Respiratory season | Accuracy  | Cases  | 121%, 35% (35%, 40%)            | 99.7%, 35% (30%, 40%)            | -9.73%, -10% (-10%, -5%)*         |
| Massachusetts | Respiratory season | Accuracy  | Deaths | 68.3%, 30% (25%, 35%)           | 56.7%, 25% (25%, 30%)            | -6.9%, -5% (-10%, -5%)*           |
| Massachusetts | Off season         | Log score | Cases  | -24%, -0.074 (-0.11, -0.046)*   | -26.8%, -0.18 (-0.24, -0.14)*    | -3.62%, -0.026 (-0.036, -0.017)*  |
| Massachusetts | Off season         | Log score | Deaths | 7.39%, 0.05 (0.04, 0.06)*       | 6.42%, 0.03 (0.03, 0.04)*        | -0.91%, -0.012 (-0.014, -0.0096)* |
| Massachusetts | Off season         | Accuracy  | Cases  | 3.66%, 0% (0%, 5%)*             | -8.13%, -4.99% (-10%, 0%)*       | -11.4%, -5% (-10%, -5%)*          |
| Massachusetts | Off season         | Accuracy  | Deaths | 7.54%, 5% (0.01%, 9.99%)        | 5.05%, 5% (0%, 5%)               | -2.31%, 0% (-5%, 0%)*             |
| Michigan      | All                | Log score | Cases  | 0.571%, -0.0055 (-0.024, 0.01)* | -9.27%, -0.034 (-0.054, -0.015)* | -9.79%, -0.03 (-0.038, -0.023)*   |
| Michigan      | All                | Log score | Deaths | 16.8%, 0.06 (0.05, 0.08)        | 7.52%, 0.04 (0.03, 0.05)*        | -7.95%, -0.032 (-0.036, -0.028)*  |
| Michigan      | All                | Accuracy  | Cases  | 26.8%, 10% (9.99%, 15%)         | 20.5%, 10% (5%, 10%)             | -5.01%, -5% (-5%, 0%)*            |
| Michigan      | All                | Accuracy  | Deaths | 21.6%, 10% (9.99%, 15%)         | 10.2%, 5% (5%, 9.99%)            | -9.42%, -5% (-9.99%, -5%)*        |
| Michigan      | Respiratory season | Log score | Cases  | 38.8%, 0.24 (0.19, 0.29)        | 29.1%, 0.19 (0.15, 0.24)         | -7.03%, -0.036 (-0.044, -0.027)*  |
| Michigan      | Respiratory season | Log score | Deaths | 38.7%, 0.19 (0.15, 0.24)        | 33%, 0.16 (0.12, 0.2)            | -4.09%, -0.036 (-0.043, -0.028)*  |
| Michigan      | Respiratory season | Accuracy  | Cases  | 116%, 35% (30%, 40%)            | 84.3%, 25% (25%, 30%)            | -14.6%, -10% (-15%, -5%)*         |



|              |                    |           |        |                                |                               |                                    |
|--------------|--------------------|-----------|--------|--------------------------------|-------------------------------|------------------------------------|
| Michigan     | Respiratory season | Accuracy  | Deaths | 83.9%, 40% (35%, 40%)          | 44.1%, 25% (20%, 25%)         | -21.6%, -20% (-20%, -15%)*         |
| Michigan     | Off season         | Log score | Cases  | -18.6%, -0.14 (-0.18, -0.11)*  | -28%, -0.21 (-0.24, -0.16)*   | -11.6%, -0.029 (-0.042, -0.017)*   |
| Michigan     | Off season         | Log score | Deaths | 4.38%, 0.04 (0.03, 0.05)*      | -6.47%, 0.02 (0.01, 0.03)*    | -10.4%, -0.028 (-0.032, -0.024)*   |
| Michigan     | Off season         | Accuracy  | Cases  | -16.4%, -10% (-10%, -5%)*      | -10.6%, -5.01% (-9.99%, 0%)*  | 7.01%, 5% (0%, 10%)                |
| Michigan     | Off season         | Accuracy  | Deaths | -18%, -10% (-15%, -10%)*       | -11.4%, -5% (-10%, 0%)*       | 8.01%, 5.01% (0%, 10%)             |
| New York     | All                | Log score | Cases  | -3.26%, 0.01 (5.9e-06, 0.02)*  | -4.56%, -0.002 (-0.02, 0.01)* | -1.34%, -0.0065 (-0.014, 6.4e-05)* |
| New York     | All                | Log score | Deaths | 19%, 0.08 (0.07, 0.09)         | 17.9%, 0.06 (0.05, 0.07)      | -0.852%, -0.011 (-0.014, -0.0086)* |
| New York     | All                | Accuracy  | Cases  | 30.7%, 15% (10%, 15%)          | 51%, 20% (20%, 25%)           | 15.6%, 10% (5%, 15%)               |
| New York     | All                | Accuracy  | Deaths | 21.7%, 10% (10%, 15%)          | 32.1%, 20% (15%, 20%)         | 8.58%, 10% (5%, 10%)               |
| New York     | Respiratory season | Log score | Cases  | 44.9%, 0.24 (0.21, 0.28)       | 44.3%, 0.24 (0.2, 0.28)       | -0.435%, -0.007 (-0.019, 0)*       |
| New York     | Respiratory season | Log score | Deaths | 37.8%, 0.21 (0.18, 0.25)       | 37.8%, 0.21 (0.17, 0.24)      | -0.00206%, -0.0056 (-0.014, 0)*    |
| New York     | Respiratory season | Accuracy  | Cases  | 62.7%, 25% (20%, 30%)          | 100%, 35% (30%, 40%)          | 22.9%, 15% (10%, 20%)              |
| New York     | Respiratory season | Accuracy  | Deaths | 51.3%, 25% (20%, 30%)          | 80.5%, 40% (35%, 40%)         | 19.3%, 15% (15%, 20%)              |
| New York     | Off season         | Log score | Cases  | -26.3%, -0.11 (-0.14, -0.085)* | -27.7%, -0.2 (-0.25, -0.15)*  | -1.94%, -0.0074 (-0.017, 2.2e-05)* |
| New York     | Off season         | Log score | Deaths | 7.78%, 0.05 (0.05, 0.06)       | 6.25%, 0.04 (0.03, 0.04)*     | -1.42%, -0.012 (-0.014, -0.01)*    |
| New York     | Off season         | Accuracy  | Cases  | 6.51%, 5% (-0.01%, 10%)        | 14%, 5% (0%, 10%)             | 7.02%, 5% (0%, 10%)                |
| New York     | Off season         | Accuracy  | Deaths | -0.706%, -0.01% (-4.99%, 5%)*  | -4.44%, -5% (-10%, 0%)*       | -3.76%, -5% (-5%, 0%)*             |
| Pennsylvania | All                | Log score | Cases  | -5.3%, -0.008 (-0.026, 0.01)*  | -5.72%, 0.01 (-0.0085, 0.02)* | -0.438%, -0.0039 (-0.011, 0)*      |
| Pennsylvania | All                | Log score | Deaths | 13.8%, 0.07 (0.06, 0.08)       | 12.9%, 0.06 (0.05, 0.07)      | -0.791%, -0.012 (-0.016, -0.009)*  |

|              |                    |           |        |                                   |                                |                                      |
|--------------|--------------------|-----------|--------|-----------------------------------|--------------------------------|--------------------------------------|
| Pennsylvania | All                | Accuracy  | Cases  | 29.7%, 10% (10%, 15%)             | 47.5%, 20% (15%, 20%)          | 13.7%, 10% (5%, 10%)                 |
| Pennsylvania | All                | Accuracy  | Deaths | 29.4%, 15% (10%, 20%)             | 36.4%, 20% (15%, 20%)          | 5.39%, 5% (0%, 9.99%)                |
| Pennsylvania | Respiratory season | Log score | Cases  | 38.5%, 0.18 (0.14, 0.22)          | 38.6%, 0.2 (0.17, 0.23)        | 0.0339%, -0.003 (-0.016, 0.01)*      |
| Pennsylvania | Respiratory season | Log score | Deaths | 36.2%, 0.15 (0.12, 0.18)          | 35.4%, 0.14 (0.11, 0.16)       | -0.636%, -0.017 (-0.028, -0.006)*    |
| Pennsylvania | Respiratory season | Accuracy  | Cases  | 48.9%, 20% (15%, 25%)             | 99.6%, 35% (30%, 40%)          | 34.1%, 20% (15%, 25%)                |
| Pennsylvania | Respiratory season | Accuracy  | Deaths | 50.6%, 25% (20%, 30%)             | 76.7%, 40% (35%, 40%)          | 17.4%, 15% (10%, 20%)                |
| Pennsylvania | Off season         | Log score | Cases  | -26.7%, -0.18 (-0.23, -0.14)*     | -27.2%, -0.19 (-0.24, -0.14)*  | -0.754%, -0.0046 (-0.012, 0)*        |
| Pennsylvania | Off season         | Log score | Deaths | 0.845%, 0.05 (0.04, 0.06)*        | -0.0572%, 0.04 (0.04, 0.05)*   | -0.895%, -0.011 (-0.014, -0.0085)*   |
| Pennsylvania | Off season         | Accuracy  | Cases  | 13%, 5% (0.01%, 9.99%)            | 2.05%, 0% (-0.01%, 4.99%)*     | -9.71%, -5.01% (-10%, -4.99%)*       |
| Pennsylvania | Off season         | Accuracy  | Deaths | 11.1%, 5% (0%, 10%)               | 1.46%, 0% (-4.99%, 5%)*        | -8.66%, -5% (-10%, -5%)*             |
| Texas        | All                | Log score | Cases  | -9.81%, -0.02 (-0.043, -0.00054)* | 1.82%, 0.01 (-0.0066, 0.02)*   | 12.9%, 0.06 (0.05, 0.07)             |
| Texas        | All                | Log score | Deaths | 6.34%, 0.03 (0.02, 0.03)*         | 15.6%, 0.03 (0.02, 0.03)*      | 8.68%, 0.01 (0.01, 0.01)*            |
| Texas        | All                | Accuracy  | Cases  | 11.1%, 5% (0.01%, 5%)             | 33.5%, 15% (10%, 15%)          | 20.2%, 10% (10%, 15%)                |
| Texas        | All                | Accuracy  | Deaths | 9.13%, 5% (0%, 5%)                | 27.6%, 15% (10%, 15%)          | 16.9%, 10% (9.99%, 15%)              |
| Texas        | Respiratory season | Log score | Cases  | 59.4%, 0.34 (0.26, 0.42)          | 77.3%, 0.43 (0.36, 0.51)       | 11.3%, 0.05 (0.04, 0.07)             |
| Texas        | Respiratory season | Log score | Deaths | 51.9%, 0.3 (0.23, 0.37)           | 68%, 0.42 (0.35, 0.49)         | 10.6%, 0.07 (0.05, 0.08)             |
| Texas        | Respiratory season | Accuracy  | Cases  | 50.1%, 20% (15%, 25%)             | 96.9%, 30% (25%, 35%)          | 31.2%, 20% (15%, 25%)                |
| Texas        | Respiratory season | Accuracy  | Deaths | 47%, 25% (20%, 25%)               | 91.5%, 40% (35%, 40%)          | 30.2%, 25% (20%, 25%)                |
| Texas        | Off season         | Log score | Cases  | -38.5%, -0.22 (-0.27, -0.18)*     | -29.9%, -0.13 (-0.17, -0.096)* | 14%, 0.06 (0.05, 0.08)               |
| Texas        | Off season         | Log score | Deaths | -16.3%, 0.02 (0.02, 0.02)*        | -10.1%, 0.01 (0.01, 0.02)*     | 7.43%, -1.8e-06 (-0.00099, 0.00049)* |

|            |                    |           |        |                                   |                                 |                                   |
|------------|--------------------|-----------|--------|-----------------------------------|---------------------------------|-----------------------------------|
| Texas      | Off season         | Accuracy  | Cases  | -16%, -10% (-15%, -5.01%)*        | -10.5%, -5% (-10%, -5%)*        | 6.57%, 5% (0.01%, 5%)             |
| Texas      | Off season         | Accuracy  | Deaths | -18.8%, -15% (-15%, -10%)*        | -19.6%, -15% (-15%, -10%)*      | -0.909%, 0% (-0.01%, 0%)*         |
| Washington | All                | Log score | Cases  | -14%, -0.092 (-0.11, -0.078)*     | -13.5%, -0.098 (-0.11, -0.084)* | 0.577%, 0.01 (0, 0.01)*           |
| Washington | All                | Log score | Deaths | -4.44%, -0.002 (-0.007, 0.00092)* | -1.65%, 0 (-0.0015, 0)*         | 2.92%, 0.01 (0.01, 0.01)*         |
| Washington | All                | Accuracy  | Cases  | 16.5%, 5% (4.99%, 10%)            | 13.5%, 5% (0.01%, 10%)          | -2.54%, 0% (0%, 0.01%)*           |
| Washington | All                | Accuracy  | Deaths | 11%, 5.01% (0%, 10%)              | 11.3%, 5.01% (5%, 9.99%)        | 0.291%, 0% (-0.01%, 0%)*          |
| Washington | Respiratory season | Log score | Cases  | 0.837%, -0.026 (-0.046, -0.0079)* | 3.75%, -0.0025 (-0.018, 0.01)*  | 2.89%, 0.03 (0.02, 0.03)*         |
| Washington | Respiratory season | Log score | Deaths | 0.291%, -0.05 (-0.068, -0.032)*   | 2.95%, -0.032 (-0.046, -0.017)* | 2.65%, 0.02 (0.01, 0.02)*         |
| Washington | Respiratory season | Accuracy  | Cases  | 27%, 10% (5%, 15%)                | 25.6%, 10% (5.01%, 15%)         | -1.03%, 0% (-0.01%, 0%)*          |
| Washington | Respiratory season | Accuracy  | Deaths | 23.9%, 10% (10%, 15%)             | 29.2%, 15% (10%, 20%)           | 4.31%, 4.99% (0%, 5%)*            |
| Washington | Off season         | Log score | Cases  | -22.7%, -0.15 (-0.17, -0.13)*     | -23.4%, -0.19 (-0.22, -0.17)*   | -0.949%, -0.01 (-0.018, -0.0035)* |
| Washington | Off season         | Log score | Deaths | -7.49%, 0.01 (0.01, 0.01)*        | -4.62%, 0.01 (0.01, 0.01)*      | 3.1%, 0 (0, 0)*                   |
| Washington | Off season         | Accuracy  | Cases  | 5.51%, 0.01% (0%, 5.01%)*         | 0.819%, 0.01% (0%, 5%)*         | -4.45%, 0% (-5%, 0%)*             |
| Washington | Off season         | Accuracy  | Deaths | -1.29%, -0.01% (-5%, 0%)*         | -5.72%, -5% (-5%, 0%)*          | -4.5%, -5% (-5%, 0%)*             |
| Wyoming    | All                | Log score | Cases  | 0.44%, -0.00092 (-0.007, 0)*      | 1.31%, 0 (-0.0045, 0.01)*       | 0.869%, 0.01 (0.01, 0.01)*        |
| Wyoming    | All                | Log score | Deaths | 8.84%, 0.03 (0.02, 0.03)*         | 12.6%, 0.03 (0.02, 0.03)*       | 3.47%, 0 (0, 0.01)*               |
| Wyoming    | All                | Accuracy  | Cases  | 6.6%, 4.99% (0%, 5%)*             | 14.4%, 5% (5%, 10%)             | 7.28%, 5% (0.01%, 5.01%)          |
| Wyoming    | All                | Accuracy  | Deaths | 3.37%, 0.01% (0%, 5%)*            | 7.98%, 5% (0%, 5%)              | 4.46%, 0% (-0.01%, 5%)*           |
| Wyoming    | Respiratory season | Log score | Cases  | 40.7%, 0.19 (0.16, 0.22)          | 42.9%, 0.17 (0.15, 0.2)         | 1.51%, -0.0036 (-0.013, 0)*       |
| Wyoming    | Respiratory season | Log score | Deaths | 34.1%, 0.18 (0.14, 0.21)          | 39.6%, 0.16 (0.13, 0.19)        | 4.1%, 8.3e-05 (-0.0084, 0.01)*    |
| Wyoming    | Respiratory season | Accuracy  | Cases  | 57.9%, 20% (15%, 25%)             | 70.8%, 25% (20%, 30%)           | 8.14%, 5% (0.01%, 10%)            |

|         |                    |           |        |                                |                                |                            |
|---------|--------------------|-----------|--------|--------------------------------|--------------------------------|----------------------------|
| Wyoming | Respiratory season | Accuracy  | Deaths | 29.6%, 15% (10%, 20%)          | 41.1%, 20% (15%, 25%)          | 8.87%, 5% (0%, 10%)        |
| Wyoming | Off season         | Log score | Cases  | -19.5%, -0.15 (-0.18, -0.12)*  | -19.1%, -0.13 (-0.16, -0.093)* | 0.454%, 0.02 (0.01, 0.02)* |
| Wyoming | Off season         | Log score | Deaths | -5.06%, 0.01 (0.01, 0.01)*     | -2.16%, 0.01 (0.01, 0.02)*     | 3.05%, 0.01 (0, 0.01)*     |
| Wyoming | Off season         | Accuracy  | Cases  | -20%, -10% (-15%, -5%)*        | -14.9%, -5% (-10%, 0%)*        | 6.39%, 5% (0%, 10%)        |
| Wyoming | Off season         | Accuracy  | Deaths | -14.2%, -9.99% (-10%, -5.01%)* | -14.2%, -9.99% (-10%, -5%)*    | 0%, 0% (-0.01%, 5%)*       |

**Table S5.** Comparison of forecast performance of the ARIMAX models. Only four models (see the top row for model names) are shown here because the fifth model (ARIMAX.FULL with vaccination included) was only able to generate forecasts for less than half of the study weeks; see details on the models in the main text. Numbers show the mean log score or point prediction accuracy of forecasts (specified in the “metric” column), aggregated across the entire study period and all locations for all forecast targets combined or individual forecast targets (specified in the “target” column). Bolded fonts indicate best performance (highest log score or accuracy).

| target         | metric    | measure | Models       |              |              |            |
|----------------|-----------|---------|--------------|--------------|--------------|------------|
|                |           |         | ARIMA        | ARIMAX.MOB   | ARIMAX.SN    | ARIMAX.MS  |
| all            | Log score | Cases   | -2.64        | <b>-2.53</b> | -2.75        | -3.03      |
| all            | Log score | Deaths  | -1.77        | -1.73        | <b>-1.64</b> | -1.71      |
| all            | Accuracy  | Cases   | 13%          | 15%          | <b>18%</b>   | 15%        |
| all            | Accuracy  | Deaths  | 14%          | 17%          | <b>21%</b>   | 17%        |
| 1-8wk ahead    | Log score | Cases   | -2.08        | <b>-2</b>    | -2.04        | -2.08      |
| 1-8wk ahead    | Log score | Deaths  | -1.34        | -1.36        | <b>-1.27</b> | -1.34      |
| 1-8wk ahead    | Accuracy  | Cases   | 22%          | 25%          | <b>26%</b>   | 24%        |
| 1-8wk ahead    | Accuracy  | Deaths  | 22%          | 25%          | <b>28%</b>   | 23%        |
| 9-16wk ahead   | Log score | Cases   | -2.86        | <b>-2.62</b> | -2.8         | -3.14      |
| 9-16wk ahead   | Log score | Deaths  | -1.89        | -1.8         | <b>-1.64</b> | -1.68      |
| 9-16wk ahead   | Accuracy  | Cases   | 8%           | 11%          | <b>14%</b>   | 11%        |
| 9-16wk ahead   | Accuracy  | Deaths  | 8%           | 12%          | <b>18%</b>   | 12%        |
| 17-26wk ahead  | Log score | Cases   | -2.89        | <b>-2.77</b> | -3.26        | -3.77      |
| 17-26wk ahead  | Log score | Deaths  | -1.82        | -1.75        | <b>-1.72</b> | -1.76      |
| 17-26wk ahead  | Accuracy  | Cases   | 8%           | 10%          | <b>12%</b>   | 10%        |
| 17-26wk ahead  | Accuracy  | Deaths  | 10%          | 12%          | <b>16%</b>   | 12%        |
| peak intensity | Log score | Cases   | <b>-3.87</b> | -4.45        | -4.39        | -4.57      |
| peak intensity | Log score | Deaths  | <b>-3.14</b> | -3.38        | -3.18        | -3.5       |
| peak intensity | Accuracy  | Cases   | 14%          | 15%          | <b>19%</b>   | 18%        |
| peak intensity | Accuracy  | Deaths  | 15%          | 18%          | <b>23%</b>   | 21%        |
| peak week      | Log score | Cases   | <b>-2.63</b> | -2.66        | -3.01        | -3.21      |
| peak week      | Log score | Deaths  | -2.54        | -2.53        | <b>-2.36</b> | -2.45      |
| peak week      | Accuracy  | Cases   | 11%          | 12%          | <b>20%</b>   | 21%        |
| peak week      | Accuracy  | Deaths  | 11%          | 13%          | <b>23%</b>   | 23%        |
| total          | Log score | Cases   | -2.37        | <b>-2.36</b> | -2.54        | -2.5       |
| total          | Log score | Deaths  | <b>-2.22</b> | -2.27        | -2.29        | -2.56      |
| total          | Accuracy  | Cases   | 10%          | 12%          | <b>13%</b>   | <b>13%</b> |
| total          | Accuracy  | Deaths  | 12%          | 13%          | 17%          | <b>19%</b> |

**Table S6.** Comparison of forecast performance of the approaches developed in this study with the best-performing ARIMAX model. Numbers show the mean log score or point prediction accuracy of forecasts (specified in the “metric” column), aggregated across the entire study period and all locations for all forecast targets combined or individual forecast targets (specified in the “target” column). Bolded fonts indicate best performance (highest log score or accuracy).

| target         | measure | Log score |          |                 | Accuracy   |          |                 |
|----------------|---------|-----------|----------|-----------------|------------|----------|-----------------|
|                |         | ARIMAX.SN | Baseline | Best-performing | ARIMAX.SN  | Baseline | Best-performing |
| all            | Cases   | -2.75     | -1.95    | <b>-1.46</b>    | 18%        | 11%      | <b>26%</b>      |
| all            | Deaths  | -1.64     | -0.97    | <b>-0.65</b>    | 21%        | 17%      | <b>31%</b>      |
| 1-8wk ahead    | Cases   | -2.04     | -1.08    | <b>-0.91</b>    | 26%        | 26%      | <b>38%</b>      |
| 1-8wk ahead    | Deaths  | -1.27     | -0.42    | <b>-0.35</b>    | 28%        | 39%      | <b>48%</b>      |
| 9-16wk ahead   | Cases   | -2.8      | -1.86    | <b>-1.49</b>    | 14%        | 4%       | <b>20%</b>      |
| 9-16wk ahead   | Deaths  | -1.64     | -0.83    | <b>-0.64</b>    | 18%        | 7%       | <b>25%</b>      |
| 17-26wk ahead  | Cases   | -3.26     | -2.8     | <b>-1.87</b>    | 12%        | 1%       | <b>16%</b>      |
| 17-26wk ahead  | Deaths  | -1.72     | -1.43    | <b>-0.8</b>     | <b>16%</b> | 1%       | <b>16%</b>      |
| peak intensity | Cases   | -4.39     | -2.43    | <b>-2.01</b>    | 19%        | 20%      | <b>40%</b>      |
| peak intensity | Deaths  | -3.18     | -1.69    | <b>-1.36</b>    | 23%        | 30%      | <b>51%</b>      |
| peak week      | Cases   | -3.01     | -3.51    | <b>-2.73</b>    | 20%        | 24%      | <b>42%</b>      |
| peak week      | Deaths  | -2.36     | -2.61    | <b>-1.53</b>    | 23%        | 35%      | <b>56%</b>      |
| total          | Cases   | -2.54     | -1.05    | <b>-0.75</b>    | 13%        | 7%       | <b>33%</b>      |
| total          | Deaths  | -2.29     | -0.99    | <b>-0.67</b>    | 17%        | 9%       | <b>36%</b>      |

**Table S7.** Preliminary assessment of the real-time forecasts initiated the week of October 2, 2022 for October 2022 – March 2023. The log score and accuracy were computed using reported case and mortality data downloaded on March 31, 2023 (see further details in the main text). As shown in Fig 8, COVID-19 mortality data in some states (e.g., Wyoming) were highly irregular during the forecast period, likely an artifact of reporting. Due to these potential data inaccuracies, the mortality-related log score and point prediction accuracy for these states are likely lower than the true values (to be obtained once more complete mortality data are available).

| State         | target         | Log score |        | Accuracy |        |
|---------------|----------------|-----------|--------|----------|--------|
|               |                | Cases     | Deaths | Cases    | Deaths |
| All           | all            | -0.45     | -0.2   | 56%      | 23%    |
| All           | 1-8wk ahead    | -0.31     | -0.06  | 56%      | 22%    |
| All           | 9-16wk ahead   | -0.71     | -0.17  | 46%      | 20%    |
| All           | 17-26wk ahead  | -0.25     | -0.12  | 64%      | 28%    |
| All           | peak intensity | -0.84     | -0.32  | 48%      | 6%     |
| All           | peak week      | -1.21     | -2.3   | 52%      | 41%    |
| All           | total          | -0.21     | -0.13  | 78%      | 7%     |
| California    | all            | -0.52     | -0.1   | 60%      | 52%    |
| California    | 1-8wk ahead    | -0.31     | -0.04  | 55%      | 32%    |
| California    | 9-16wk ahead   | -0.99     | -0.11  | 41%      | 74%    |
| California    | 17-26wk ahead  | -0.24     | -0.06  | 73%      | 43%    |
| California    | peak intensity | -1.39     | -0.1   | 90%      | 60%    |
| California    | peak week      | -0.72     | -0.86  | 100%     | 100%   |
| California    | total          | -0.24     | -0.1   | 60%      | 60%    |
| Florida       | all            | -0.38     | -0.19  | 28%      | 8%     |
| Florida       | 1-8wk ahead    | -0.06     | -0.02  | 5%       | 0%     |
| Florida       | 9-16wk ahead   | -0.66     | -0.2   | 9%       | 14%    |
| Florida       | 17-26wk ahead  | -0.31     | -0.16  | 56%      | 13%    |
| Florida       | peak intensity | -1.2      | -0.54  | 0%       | 0%     |
| Florida       | peak week      | -0.74     | -1.6   | 90%      | 0%     |
| Florida       | total          | -0.16     | -0.05  | 50%      | 0%     |
| Iowa          | all            | -0.37     | -0.12  | 53%      | 29%    |
| Iowa          | 1-8wk ahead    | -0.2      | -0.05  | 86%      | 12%    |
| Iowa          | 9-16wk ahead   | -0.59     | -0.09  | 42%      | 24%    |
| Iowa          | 17-26wk ahead  | -0.2      | -0.07  | 29%      | 49%    |
| Iowa          | peak intensity | -0.71     | -0.11  | 80%      | 0%     |
| Iowa          | peak week      | -1.37     | -1.38  | 60%      | 70%    |
| Iowa          | total          | -0.26     | -0.05  | 70%      | 0%     |
| Massachusetts | all            | -0.64     | -0.31  | 61%      | 9%     |
| Massachusetts | 1-8wk ahead    | -0.7      | -0.06  | 41%      | 18%    |
| Massachusetts | 9-16wk ahead   | -0.86     | -0.46  | 72%      | 6%     |

|               |                |       |       |      |     |
|---------------|----------------|-------|-------|------|-----|
| Massachusetts | 17-26wk ahead  | -0.36 | -0.2  | 78%  | 0%  |
| Massachusetts | peak intensity | -1.33 | -0.61 | 0%   | 0%  |
| Massachusetts | peak week      | -0.95 | -1.62 | 0%   | 70% |
| Massachusetts | total          | -0.26 | -0.7  | 80%  | 0%  |
| Michigan      | all            | -0.32 | -0.32 | 51%  | 17% |
| Michigan      | 1-8wk ahead    | -0.3  | -0.2  | 45%  | 25% |
| Michigan      | 9-16wk ahead   | -0.46 | -0.21 | 64%  | 12% |
| Michigan      | 17-26wk ahead  | -0.11 | -0.22 | 41%  | 19% |
| Michigan      | peak intensity | -0.35 | -0.12 | 100% | 0%  |
| Michigan      | peak week      | -1.81 | -3.59 | 0%   | 0%  |
| Michigan      | total          | -0.06 | -0.05 | 90%  | 0%  |
| New York      | all            | -0.76 | -0.14 | 66%  | 17% |
| New York      | 1-8wk ahead    | -0.68 | -0.07 | 52%  | 14% |
| New York      | 9-16wk ahead   | -1.27 | -0.05 | 48%  | 0%  |
| New York      | 17-26wk ahead  | -0.34 | -0.05 | 98%  | 37% |
| New York      | peak intensity | -0.97 | -0.11 | 30%  | 0%  |
| New York      | peak week      | -1.76 | -2.31 | 10%  | 0%  |
| New York      | total          | -0.24 | -0.06 | 90%  | 0%  |
| Pennsylvania  | all            | -0.49 | -0.12 | 59%  | 37% |
| Pennsylvania  | 1-8wk ahead    | -0.33 | -0.05 | 81%  | 25% |
| Pennsylvania  | 9-16wk ahead   | -0.75 | -0.1  | 34%  | 30% |
| Pennsylvania  | 17-26wk ahead  | -0.34 | -0.08 | 62%  | 53% |
| Pennsylvania  | peak intensity | -0.73 | -0.16 | 0%   | 0%  |
| Pennsylvania  | peak week      | -1.09 | -1.33 | 100% | 90% |
| Pennsylvania  | total          | -0.21 | -0.08 | 80%  | 0%  |
| Texas         | all            | -0.37 | -0.08 | 64%  | 10% |
| Texas         | 1-8wk ahead    | -0.22 | -0.03 | 78%  | 4%  |
| Texas         | 9-16wk ahead   | -0.67 | -0.05 | 60%  | 19% |
| Texas         | 17-26wk ahead  | -0.18 | -0.04 | 50%  | 3%  |
| Texas         | peak intensity | -0.75 | -0.09 | 70%  | 0%  |
| Texas         | peak week      | -0.83 | -1.22 | 100% | 70% |
| Texas         | total          | -0.26 | -0.05 | 80%  | 0%  |
| Washington    | all            | -0.26 | -0.3  | 78%  | 31% |
| Washington    | 1-8wk ahead    | -0.21 | -0.04 | 75%  | 65% |
| Washington    | 9-16wk ahead   | -0.35 | -0.1  | 62%  | 12% |
| Washington    | 17-26wk ahead  | -0.15 | -0.07 | 92%  | 26% |
| Washington    | peak intensity | -0.52 | -0.08 | 90%  | 0%  |
| Washington    | peak week      | -0.76 | -6.85 | 60%  | 0%  |
| Washington    | total          | -0.22 | -0.06 | 90%  | 10% |
| Wyoming       | all            | -0.35 | -0.29 | 44%  | 21% |



---

|         |                |       |       |     |     |
|---------|----------------|-------|-------|-----|-----|
| Wyoming | 1-8wk ahead    | -0.14 | -0.03 | 40% | 25% |
| Wyoming | 9-16wk ahead   | -0.47 | -0.3  | 29% | 9%  |
| Wyoming | 17-26wk ahead  | -0.27 | -0.21 | 63% | 33% |
| Wyoming | peak intensity | -0.42 | -1.29 | 20% | 0%  |
| Wyoming | peak week      | -2.1  | -2.23 | 0%  | 10% |
| Wyoming | total          | -0.21 | -0.04 | 90% | 0%  |

---

**Table S8.** Prior ranges for the parameters and variables used in the model-inference system. Parameters/state variables are initialized by drawing from uniform distributions specified in the rows labeled “Initialization”. During the filtering process, space-reprobing is applied to explore the state space, i.e., a small fraction of the ensemble members are randomly replaced with values drawn from the uniform distributions specified in the rows labeled with “Space-reprobing”.

| Type           | Parameters/ variables                       | Symbol   | Range                                                                                                                                    | Note                                                                          |
|----------------|---------------------------------------------|----------|------------------------------------------------------------------------------------------------------------------------------------------|-------------------------------------------------------------------------------|
| Initialization | Initial susceptible                         | S(t=0)   | All locations: non-Omicron period, U[99%, 100%] population; Omicron period, U[50%, 90%] population                                       | n/a                                                                           |
| Initialization | Initial exposed                             | E(t=0)   | All locations: U[5, 50] × no. cases during 1st week                                                                                      | n/a                                                                           |
| Initialization | Initial infectious                          | I(t=0)   | All locations: U[5,50] × no. cases during 1st week                                                                                       | n/a                                                                           |
| Initialization | Infectious period                           | D        | All locations: U[2, 5] days                                                                                                              | n/a                                                                           |
| Initialization | Latency period                              | Z        | All locations: U[2, 5] days                                                                                                              | n/a                                                                           |
| Initialization | Duration of immunity (from prior infection) | L        | All locations: non-Omicron period, U[2, 3] years; Omicron period: U[1, 3] years                                                          | n/a                                                                           |
| Initialization | Time-to-detection, mean                     | Td, mean | All locations: U[5, 8] days                                                                                                              | n/a                                                                           |
| Initialization | Time-to-detection, sd                       | Td, sd   | All locations: U[1, 3] days                                                                                                              | To allow variation in time to diagnosis/reporting                             |
| Initialization | Scaling of NPI effectiveness                | e        | All locations: U[0.5, 1.5]                                                                                                               | Around 1, with a large bound to be flexible                                   |
| Initialization | Vaccine efficacy (VE)                       | n/a      | All locations: before Delta, VE1=85%, VE2 = 95%; Delta, VE1 = 50%, VE2 = 80%; Omicron, VE1 = 10%, VE2 (combined 2nd and 3rd doses) = 70% | Used higher VE values, as the observations included both cases/infections and |

---

|                 |                          |         |                                                                                                                                                                                                                                                                                                                                                                                                                                                                                                                                                                                                                                                                                                                                                                                                                                                                                                                                                                                                                                                                                                                                                                                                                                                                                                                   |                                                                    |
|-----------------|--------------------------|---------|-------------------------------------------------------------------------------------------------------------------------------------------------------------------------------------------------------------------------------------------------------------------------------------------------------------------------------------------------------------------------------------------------------------------------------------------------------------------------------------------------------------------------------------------------------------------------------------------------------------------------------------------------------------------------------------------------------------------------------------------------------------------------------------------------------------------------------------------------------------------------------------------------------------------------------------------------------------------------------------------------------------------------------------------------------------------------------------------------------------------------------------------------------------------------------------------------------------------------------------------------------------------------------------------------------------------|--------------------------------------------------------------------|
|                 |                          |         |                                                                                                                                                                                                                                                                                                                                                                                                                                                                                                                                                                                                                                                                                                                                                                                                                                                                                                                                                                                                                                                                                                                                                                                                                                                                                                                   | deaths; i.e., here VE is for both infections and mortality         |
| Initialization  | VE waning                | $\rho$  | $\rho(t) = 1/(1+\exp(-k * (t - tm.imm/2)))$ ; for wildtype: $k = 0.026$ ; $tm.imm = 322$ ; for Delta: $k = 0.025$ ; $tm.imm = 280$ ; for Omicron: $k = 0.024$ ; $tm.imm = 256$                                                                                                                                                                                                                                                                                                                                                                                                                                                                                                                                                                                                                                                                                                                                                                                                                                                                                                                                                                                                                                                                                                                                    | Parameter in the logistic function fitted based on data from UKHSA |
| Initialization  | Infection-detection rate | $r$     | all locations: U [0.01, 0.05]                                                                                                                                                                                                                                                                                                                                                                                                                                                                                                                                                                                                                                                                                                                                                                                                                                                                                                                                                                                                                                                                                                                                                                                                                                                                                     | n/a                                                                |
| Initialization  | Infection-fatality risk  | IFR     | all locations: U [0.005, 0.015]                                                                                                                                                                                                                                                                                                                                                                                                                                                                                                                                                                                                                                                                                                                                                                                                                                                                                                                                                                                                                                                                                                                                                                                                                                                                                   | n/a                                                                |
| Initialization  | Transmission rate        | $\beta$ | Wyoming: U [0.41, 0.6]; Iowa, Texas, Washington: U [0.44, 0.75]; California, Florida, Massachusetts, Michigan, New York, Pennsylvania: U [0.45, 0.75]                                                                                                                                                                                                                                                                                                                                                                                                                                                                                                                                                                                                                                                                                                                                                                                                                                                                                                                                                                                                                                                                                                                                                             | n/a                                                                |
| Space-reprobing | Transmission rate        | $\beta$ | Alpha (2021-02-14 to 2021-06-19): Wyoming, U [0.54, 0.9]; Iowa, Texas, Washington, U [0.57, 1.12]; California, Florida, Massachusetts, Michigan, New York, Pennsylvania, U [0.585, 1.125];<br>Delta (2021-06-06 to 2021-12-18): Wyoming, U [0.5, 1.02]; Iowa, Texas, U [0.52, 1.27]; Washington, U [0.53, 1.27]; California, Florida, Michigan, New York, Pennsylvania, U [0.54, 1.275];<br>Delta_holiday (2021-07-04 to 2021-07-31): Massachusetts, U [0.855, 1.275];<br>Delta1 (2021-06-13 to 2021-07-03): Massachusetts, U [0.54, 1.275];<br>Delta2 (2021-08-01 to 2021-08-21): Massachusetts, U [0.54, 1.02];<br>Delta3 (2021-08-22 to 2021-12-18): Massachusetts, U [0.54, 1.275];<br>Omicron_BA.1 (2021-12-05 to 2022-03-26): Wyoming, U [0.62, 1.2]; Texas, U [0.65, 1.5]; Iowa, Washington, U [0.66, 1.5]; California, Florida, Massachusetts, Michigan, New York, Pennsylvania, U [0.675, 1.5];<br>Omicron_BA.2 (2022-03-06 to 2022-05-07): Wyoming, U [0.75, 1.68]; Iowa, Texas, Washington, U [0.79, 2.1]; California, Florida, Massachusetts, Michigan, New York, Pennsylvania, U [0.81, 2.1];<br>Omicron_BA.2.12.1 (2022-04-03 to 2022-06-18): Wyoming, U [0.75, 1.68]; Iowa, Texas, Washington, U [0.79, 2.1]; California, Florida, Massachusetts, Michigan, New York, Pennsylvania, U [0.81, 2.1]; | n/a                                                                |

---

---

|                 |                          |          |                                                                                                                                                                                                                                                                                                                                                                                                                                                                                                                                                                                                                                                                                                                                                                                                                                                                                                                                                                                                                                                                                                                                                                                                                                                                                                                                                                                                                                                                                                                                                                                                                                                                                                                                                                                                                                                                                                                                                                                                                                                                                                                                                                                                                                                                                                                                                                                                                           |
|-----------------|--------------------------|----------|---------------------------------------------------------------------------------------------------------------------------------------------------------------------------------------------------------------------------------------------------------------------------------------------------------------------------------------------------------------------------------------------------------------------------------------------------------------------------------------------------------------------------------------------------------------------------------------------------------------------------------------------------------------------------------------------------------------------------------------------------------------------------------------------------------------------------------------------------------------------------------------------------------------------------------------------------------------------------------------------------------------------------------------------------------------------------------------------------------------------------------------------------------------------------------------------------------------------------------------------------------------------------------------------------------------------------------------------------------------------------------------------------------------------------------------------------------------------------------------------------------------------------------------------------------------------------------------------------------------------------------------------------------------------------------------------------------------------------------------------------------------------------------------------------------------------------------------------------------------------------------------------------------------------------------------------------------------------------------------------------------------------------------------------------------------------------------------------------------------------------------------------------------------------------------------------------------------------------------------------------------------------------------------------------------------------------------------------------------------------------------------------------------------------------|
| Space-reprobing | Infection-detection rate | <i>r</i> | <p>Omicron_nonBA.1o2 (2022-06-05 to 2022-12-31): Wyoming, U [0.75, 1.68]; Iowa, Texas, Washington, U [0.79, 2.1]; California, Florida, Massachusetts, Michigan, New York, Pennsylvania, U [0.81, 2.1];</p> <p>wave1 (2020-01-01 to 2020-09-30): Wyoming, U [0.41, 0.6]; Iowa, Texas, Washington, U [0.44, 0.75]; California, Florida, Massachusetts, Michigan, New York, Pennsylvania, U [0.45, 0.75];</p> <p>wave2 (2020-10-01 to 2021-03-20): Wyoming, U [0.41, 0.66]; Iowa, Texas, Washington, U [0.44, 0.83]; California, Florida, Massachusetts, Michigan, New York, Pennsylvania, U [0.45, 0.825]</p> <p>2020summer (2020-06-01 to 2020-10-03): Massachusetts, New York, Wyoming, U [0.05, n/a 0.25]; Michigan, Pennsylvania, U [0.05, 0.3125]; California, Florida, Iowa, Texas, Washington, U [0.05, 0.375];</p> <p>2021summer (2021-06-01 to 2021-06-30): California, Iowa, Massachusetts, Michigan, New York, Pennsylvania, U [0.02, 0.1]; California, Florida, Iowa, Massachusetts, Michigan, New York, Pennsylvania, Texas, Washington, U [0.03, 0.25];</p> <p>Alpha (2021-02-14 to 2021-05-31): Florida, Iowa, Massachusetts, Michigan, Pennsylvania, Texas, U [0.2, 0.4]; California, New York, Washington, Wyoming, U [0.2, 0.48];</p> <p>Delta (2021-05-31 to 2022-01-01): Florida, Texas, Washington, Wyoming, U [0.1, 0.5];</p> <p>Delta1 (2021-06-21 to 2021-07-17): California, Iowa, Massachusetts, Michigan, New York, Pennsylvania, U [0.1, 0.5];</p> <p>Delta2 (2021-06-27 to 2021-08-08): California, Iowa, Massachusetts, Michigan, New York, Pennsylvania, U [0.3, 0.5];</p> <p>Delta3 (2021-07-19 to 2022-01-08): California, Iowa, Massachusetts, Michigan, New York, Pennsylvania, U [0.1, 0.5];</p> <p>massvax (2021-05-14 to 2021-05-31): California, Iowa, Massachusetts, Michigan, New York, Pennsylvania, Washington, U [0.05, 0.3];</p> <p>Omicron0 (2021-10-15 to 2021-12-11): all locations, U [0.001, 0.05];</p> <p>Omicron1a (2021-12-05 to 2021-12-18): all locations, U [0.1, 0.5];</p> <p>Omicron1b (2021-12-05 to 2021-12-25): all locations, U [0.1, 0.6];</p> <p>Omicron2 (2021-12-26 to 2022-06-18): all locations, U [0.05, 0.2];</p> <p>Omicron3 (2022-06-05 to 2022-12-31): all locations, U [0.02, 0.18];</p> <p>wave1 (2020-03-08 to 2020-05-31): all locations, U [0.08, 0.35];</p> <p>wave2 (2020-09-06 to 2021-03-20): Florida, Iowa, Massachusetts, Michigan,</p> |
|-----------------|--------------------------|----------|---------------------------------------------------------------------------------------------------------------------------------------------------------------------------------------------------------------------------------------------------------------------------------------------------------------------------------------------------------------------------------------------------------------------------------------------------------------------------------------------------------------------------------------------------------------------------------------------------------------------------------------------------------------------------------------------------------------------------------------------------------------------------------------------------------------------------------------------------------------------------------------------------------------------------------------------------------------------------------------------------------------------------------------------------------------------------------------------------------------------------------------------------------------------------------------------------------------------------------------------------------------------------------------------------------------------------------------------------------------------------------------------------------------------------------------------------------------------------------------------------------------------------------------------------------------------------------------------------------------------------------------------------------------------------------------------------------------------------------------------------------------------------------------------------------------------------------------------------------------------------------------------------------------------------------------------------------------------------------------------------------------------------------------------------------------------------------------------------------------------------------------------------------------------------------------------------------------------------------------------------------------------------------------------------------------------------------------------------------------------------------------------------------------------------|

---

---

|                 |                         |     |                                                                                                                                                                                                                                                                                                                                                                                                                                                                                                                                                                                                                                                                                                                                                                                                                                                                                              |     |
|-----------------|-------------------------|-----|----------------------------------------------------------------------------------------------------------------------------------------------------------------------------------------------------------------------------------------------------------------------------------------------------------------------------------------------------------------------------------------------------------------------------------------------------------------------------------------------------------------------------------------------------------------------------------------------------------------------------------------------------------------------------------------------------------------------------------------------------------------------------------------------------------------------------------------------------------------------------------------------|-----|
| Space-reprobing | Infection-fatality risk | IFR | Pennsylvania, Texas, U [0.12, 0.4]; New York, Washington, Wyoming, U [0.144, 0.48];<br>California, U [0.144, 0.54]<br>2020summer (2020-06-01 to 2020-09-30): all locations, U [1e-04, 0.005];<br>Alpha (2021-03-07 to 2021-06-19): all locations, U [1e-04, 0.015];<br>Delta (2021-06-13 to 2022-01-01): all locations, U [1e-04, 0.015];<br>massvax (2021-05-14 to 2021-06-26): California, Florida, Iowa, Massachusetts,<br>Michigan, New York, Pennsylvania, Texas, Washington, U [1e-04, 0.01];<br>Omicron_BA.1 (2021-12-12 to 2022-06-18): all locations, U [4e-05, 0.004];<br>Omicron_nonBA.1 (2022-06-05 to 2022-12-31): all locations, U [8e-06, 0.0032];<br>wave1early (2020-03-16 to 2020-04-15): all locations, U [0.005, 0.025];<br>wave1late (2020-04-16 to 2020-05-31): all locations, U [0.001, 0.015];<br>wave2 (2020-10-01 to 2021-04-24): all locations, U [2e-04, 0.0125] | n/a |
|-----------------|-------------------------|-----|----------------------------------------------------------------------------------------------------------------------------------------------------------------------------------------------------------------------------------------------------------------------------------------------------------------------------------------------------------------------------------------------------------------------------------------------------------------------------------------------------------------------------------------------------------------------------------------------------------------------------------------------------------------------------------------------------------------------------------------------------------------------------------------------------------------------------------------------------------------------------------------------|-----|

---
